# Supplementary material for: Association of type 2 Diabetes Mellitus and bone mineral density: a two-sample Mendelian randomization study
Source: BMC Musculoskelet Disord. 2024 Feb 12;25:130. doi: 10.1186/s12891-024-07195-6 (PMC10860277; doi:10.1186/s12891-024-07195-6)
Supplement: Supplementary file 1 — Supplementary Material 1 [file 12891_2024_7195_MOESM1_ESM.xlsx]

## Sheet: S1
Table S1. Mendelian randomization (MR) analysis of DM2 and TB-BMD
SNP	effect_allele.exposure	other_allele.exposure	effect_allele.outcome	other_allele.outcome	beta.exposure	beta.outcome	eaf.exposure	eaf.outcome	remove	palindromic	ambiguous	id.outcome	chr	pos	se.outcome	samplesize.outcome	pval.outcome	outcome	originalname.outcome	outcome.deprecated	mr_keep.outcome	data_source.outcome	se.exposure	samplesize.exposure	pval.exposure	pos.exposure	chr.exposure	id.exposure	exposure	mr_keep.exposure	pval_origin.exposure	data_source.exposure	action	mr_keep
rs10077431	A	C	A	C	-0.0487	-0.0044	0.214668	0.2115	FALSE	FALSE	FALSE	ebi-a-GCST005348	5	112927686	0.007	56284	0.5339	Total body bone mineral density || id:ebi-a-GCST005348	Total body bone mineral density	Total body bone mineral density || ||	TRUE	igd	0.0089	62892	4.75499e-08	112927686	5	ebi-a-GCST006867	Type 2 diabetes || id:ebi-a-GCST006867	TRUE	reported	igd	1	TRUE
rs10087241	A	G	A	G	-0.0475	0.0065	0.594893	0.595	FALSE	FALSE	FALSE	ebi-a-GCST005348	8	30863722	0.0058	56284	0.2623	Total body bone mineral density || id:ebi-a-GCST005348	Total body bone mineral density	Total body bone mineral density || ||	TRUE	igd	0.008	62892	2.79602e-09	30863722	8	ebi-a-GCST006867	Type 2 diabetes || id:ebi-a-GCST006867	TRUE	reported	igd	1	TRUE
rs10100265	C	A	C	A	-0.0491	-0.0047	0.61049	0.6093	FALSE	FALSE	FALSE	ebi-a-GCST005348	8	10633159	0.006	56284	0.4258	Total body bone mineral density || id:ebi-a-GCST005348	Total body bone mineral density	Total body bone mineral density || ||	TRUE	igd	0.0079	62892	6.28796e-10	10633159	8	ebi-a-GCST006867	Type 2 diabetes || id:ebi-a-GCST006867	TRUE	reported	igd	1	TRUE
rs10114341	C	T	C	T	-0.0409	-0.0121	0.440754	0.432	FALSE	FALSE	FALSE	ebi-a-GCST005348	9	96919182	0.0057	56284	0.0332101	Total body bone mineral density || id:ebi-a-GCST005348	Total body bone mineral density	Total body bone mineral density || ||	TRUE	igd	0.0072	62892	1.15101e-08	96919182	9	ebi-a-GCST006867	Type 2 diabetes || id:ebi-a-GCST006867	TRUE	reported	igd	1	TRUE
rs10401969	C	T	C	T	0.0921	0.0124	0.0765858	0.0855	FALSE	FALSE	FALSE	ebi-a-GCST005348	19	19407718	0.0106	56284	0.2427	Total body bone mineral density || id:ebi-a-GCST005348	Total body bone mineral density	Total body bone mineral density || ||	TRUE	igd	0.0133	62892	4.13143e-12	19407718	19	ebi-a-GCST006867	Type 2 diabetes || id:ebi-a-GCST006867	TRUE	reported	igd	1	TRUE
rs1050226	G	A	G	A	-0.0491	-0.0038	0.406792	0.3949	FALSE	FALSE	FALSE	ebi-a-GCST005348	6	7281654	0.0058	56284	0.5139	Total body bone mineral density || id:ebi-a-GCST005348	Total body bone mineral density	Total body bone mineral density || ||	TRUE	igd	0.0074	62892	3.34195e-11	7281654	6	ebi-a-GCST006867	Type 2 diabetes || id:ebi-a-GCST006867	TRUE	reported	igd	1	TRUE
rs1061813	A	G	A	G	-0.0429	-0.0033	0.537119	0.5437	FALSE	FALSE	FALSE	ebi-a-GCST005348	5	14847331	0.0058	56284	0.576901	Total body bone mineral density || id:ebi-a-GCST005348	Total body bone mineral density	Total body bone mineral density || ||	TRUE	igd	0.0073	62892	3.37202e-09	14847331	5	ebi-a-GCST006867	Type 2 diabetes || id:ebi-a-GCST006867	TRUE	reported	igd	1	TRUE
rs1063355	G	T	G	T	0.0709	0.0146	0.602436	0.5802	FALSE	FALSE	FALSE	ebi-a-GCST005348	6	32627714	0.0064	56284	0.0229699	Total body bone mineral density || id:ebi-a-GCST005348	Total body bone mineral density	Total body bone mineral density || ||	TRUE	igd	0.0079	62892	3.71535e-19	32627714	6	ebi-a-GCST006867	Type 2 diabetes || id:ebi-a-GCST006867	TRUE	reported	igd	1	TRUE
rs10740322	A	G	A	G	0.0477	-0.0018	0.687104	0.663	FALSE	FALSE	FALSE	ebi-a-GCST005348	10	71485458	0.006	56284	0.770201	Total body bone mineral density || id:ebi-a-GCST005348	Total body bone mineral density	Total body bone mineral density || ||	TRUE	igd	0.0085	62892	2.10902e-08	71485458	10	ebi-a-GCST006867	Type 2 diabetes || id:ebi-a-GCST006867	TRUE	reported	igd	1	TRUE
rs10811661	C	T	C	T	-0.1569	0.0143	0.173605	0.177	FALSE	FALSE	FALSE	ebi-a-GCST005348	9	22134094	0.0076	56284	0.0580604	Total body bone mineral density || id:ebi-a-GCST005348	Total body bone mineral density	Total body bone mineral density || ||	TRUE	igd	0.0098	62892	4.13238e-58	22134094	9	ebi-a-GCST006867	Type 2 diabetes || id:ebi-a-GCST006867	TRUE	reported	igd	1	TRUE
rs10830963	G	C	G	C	0.0909	0.003	0.275768	0.2616	FALSE	TRUE	FALSE	ebi-a-GCST005348	11	92708710	0.0069	56284	0.666099	Total body bone mineral density || id:ebi-a-GCST005348	Total body bone mineral density	Total body bone mineral density || ||	TRUE	igd	0.008	62892	5.84655e-30	92708710	11	ebi-a-GCST006867	Type 2 diabetes || id:ebi-a-GCST006867	TRUE	reported	igd	1	TRUE
rs10842994	T	C	T	C	-0.0755	0.0117	0.197025	0.1878	FALSE	FALSE	FALSE	ebi-a-GCST005348	12	27965150	0.0074	56284	0.1146	Total body bone mineral density || id:ebi-a-GCST005348	Total body bone mineral density	Total body bone mineral density || ||	TRUE	igd	0.0091	62892	1.01508e-16	27965150	12	ebi-a-GCST006867	Type 2 diabetes || id:ebi-a-GCST006867	TRUE	reported	igd	1	TRUE
rs10974438	C	A	C	A	0.0591	0.0043	0.351215	0.3423	FALSE	FALSE	FALSE	ebi-a-GCST005348	9	4291928	0.0061	56284	0.4813	Total body bone mineral density || id:ebi-a-GCST005348	Total body bone mineral density	Total body bone mineral density || ||	TRUE	igd	0.0075	62892	3.01301e-15	4291928	9	ebi-a-GCST006867	Type 2 diabetes || id:ebi-a-GCST006867	TRUE	reported	igd	1	TRUE
rs11098676	C	T	C	T	0.054	-0.0051	0.787639	0.7575	FALSE	FALSE	FALSE	ebi-a-GCST005348	4	123833154	0.0067	56284	0.4425	Total body bone mineral density || id:ebi-a-GCST005348	Total body bone mineral density	Total body bone mineral density || ||	TRUE	igd	0.0096	62892	2.02698e-08	123833154	4	ebi-a-GCST006867	Type 2 diabetes || id:ebi-a-GCST006867	TRUE	reported	igd	1	TRUE
rs11107116	T	G	T	G	0.0467	0.0131	0.219714	0.2167	FALSE	FALSE	FALSE	ebi-a-GCST005348	12	93978504	0.0068	56284	0.0548504	Total body bone mineral density || id:ebi-a-GCST005348	Total body bone mineral density	Total body bone mineral density || ||	TRUE	igd	0.0085	62892	3.74999e-08	93978504	12	ebi-a-GCST006867	Type 2 diabetes || id:ebi-a-GCST006867	TRUE	reported	igd	1	TRUE
rs1111875	T	C	T	C	-0.0948	0.0118	0.408262	0.408	FALSE	FALSE	FALSE	ebi-a-GCST005348	10	94462882	0.0058	56284	0.0417503	Total body bone mineral density || id:ebi-a-GCST005348	Total body bone mineral density	Total body bone mineral density || ||	TRUE	igd	0.0072	62892	3.61493e-39	94462882	10	ebi-a-GCST006867	Type 2 diabetes || id:ebi-a-GCST006867	TRUE	reported	igd	1	TRUE
rs11257655	T	C	T	C	0.0737	0.0007	0.206773	0.2216	FALSE	FALSE	FALSE	ebi-a-GCST005348	10	12307894	0.0069	56284	0.9166	Total body bone mineral density || id:ebi-a-GCST005348	Total body bone mineral density	Total body bone mineral density || ||	TRUE	igd	0.0087	62892	1.96607e-17	12307894	10	ebi-a-GCST006867	Type 2 diabetes || id:ebi-a-GCST006867	TRUE	reported	igd	1	TRUE
rs1127655	T	C	T	C	-0.0438	-0.0059	0.529064	0.5319	FALSE	FALSE	FALSE	ebi-a-GCST005348	1	117530507	0.0056	56284	0.2934	Total body bone mineral density || id:ebi-a-GCST005348	Total body bone mineral density	Total body bone mineral density || ||	TRUE	igd	0.0079	62892	2.47098e-08	117530507	1	ebi-a-GCST006867	Type 2 diabetes || id:ebi-a-GCST006867	TRUE	reported	igd	1	TRUE
rs11708067	G	A	G	A	-0.0965	-0.0031	0.23899	0.2257	FALSE	FALSE	FALSE	ebi-a-GCST005348	3	123065778	0.0067	56284	0.640801	Total body bone mineral density || id:ebi-a-GCST005348	Total body bone mineral density	Total body bone mineral density || ||	TRUE	igd	0.0086	62892	5.93335e-29	123065778	3	ebi-a-GCST006867	Type 2 diabetes || id:ebi-a-GCST006867	TRUE	reported	igd	1	TRUE
rs11925227	A	G	A	G	-0.0534	0.0061	0.183439	0.1819	FALSE	FALSE	FALSE	ebi-a-GCST005348	3	170766618	0.0078	56284	0.4325	Total body bone mineral density || id:ebi-a-GCST005348	Total body bone mineral density	Total body bone mineral density || ||	TRUE	igd	0.0095	62892	2.24999e-08	170766618	3	ebi-a-GCST006867	Type 2 diabetes || id:ebi-a-GCST006867	TRUE	reported	igd	1	TRUE
rs11926707	C	T	C	T	0.0463	-0.0049	0.625556	0.6094	FALSE	FALSE	FALSE	ebi-a-GCST005348	3	46925539	0.0061	56284	0.4168	Total body bone mineral density || id:ebi-a-GCST005348	Total body bone mineral density	Total body bone mineral density || ||	TRUE	igd	0.0082	62892	1.68601e-08	46925539	3	ebi-a-GCST006867	Type 2 diabetes || id:ebi-a-GCST006867	TRUE	reported	igd	1	TRUE
rs12088739	G	A	G	A	-0.0884	-0.0203	0.0898481	0.102	FALSE	FALSE	FALSE	ebi-a-GCST005348	1	51506886	0.0097	56284	0.0359302	Total body bone mineral density || id:ebi-a-GCST005348	Total body bone mineral density	Total body bone mineral density || ||	TRUE	igd	0.013	62892	9.79264e-12	51506886	1	ebi-a-GCST006867	Type 2 diabetes || id:ebi-a-GCST006867	TRUE	reported	igd	1	TRUE
rs12299509	G	A	G	A	0.0467	-0.0009	0.478622	0.4532	FALSE	FALSE	FALSE	ebi-a-GCST005348	12	4406281	0.0061	56284	0.878	Total body bone mineral density || id:ebi-a-GCST005348	Total body bone mineral density	Total body bone mineral density || ||	TRUE	igd	0.0073	62892	2.08699e-10	4406281	12	ebi-a-GCST006867	Type 2 diabetes || id:ebi-a-GCST006867	TRUE	reported	igd	1	TRUE
rs12617659	T	C	T	C	-0.0685	-0.0109	0.147238	0.1446	FALSE	FALSE	FALSE	ebi-a-GCST005348	2	121309759	0.0081	56284	0.1802	Total body bone mineral density || id:ebi-a-GCST005348	Total body bone mineral density	Total body bone mineral density || ||	TRUE	igd	0.0103	62892	2.82683e-11	121309759	2	ebi-a-GCST006867	Type 2 diabetes || id:ebi-a-GCST006867	TRUE	reported	igd	1	TRUE
rs12910825	G	A	G	A	0.0517	0.001	0.360391	0.4178	FALSE	FALSE	FALSE	ebi-a-GCST005348	15	91511260	0.0059	56284	0.8639	Total body bone mineral density || id:ebi-a-GCST005348	Total body bone mineral density	Total body bone mineral density || ||	TRUE	igd	0.0074	62892	2.16421e-12	91511260	15	ebi-a-GCST006867	Type 2 diabetes || id:ebi-a-GCST006867	TRUE	reported	igd	1	TRUE
rs12945601	C	T	C	T	-0.048	-0.0249	0.613603	0.5603	FALSE	FALSE	FALSE	ebi-a-GCST005348	17	17653411	0.0058	56284	1.80601e-05	Total body bone mineral density || id:ebi-a-GCST005348	Total body bone mineral density	Total body bone mineral density || ||	TRUE	igd	0.008	62892	1.71799e-09	17653411	17	ebi-a-GCST006867	Type 2 diabetes || id:ebi-a-GCST006867	TRUE	reported	igd	1	TRUE
rs12970134	A	G	A	G	0.0555	0.0164	0.26512	0.2615	FALSE	FALSE	FALSE	ebi-a-GCST005348	18	57884750	0.0065	56284	0.01126	Total body bone mineral density || id:ebi-a-GCST005348	Total body bone mineral density	Total body bone mineral density || ||	TRUE	igd	0.008	62892	5.30884e-12	57884750	18	ebi-a-GCST006867	Type 2 diabetes || id:ebi-a-GCST006867	TRUE	reported	igd	1	TRUE
rs13234269	A	T	A	T	-0.0583	-0.0051	0.492515	0.4698	FALSE	TRUE	TRUE	ebi-a-GCST005348	7	130429186	0.0057	56284	0.3739	Total body bone mineral density || id:ebi-a-GCST005348	Total body bone mineral density	Total body bone mineral density || ||	TRUE	igd	0.0078	62892	6.9775e-14	130429186	7	ebi-a-GCST006867	Type 2 diabetes || id:ebi-a-GCST006867	TRUE	reported	igd	1	TRUE
rs13239186	T	C	T	C	0.0539	-0.0094	0.302029	0.293	FALSE	FALSE	FALSE	ebi-a-GCST005348	7	117510621	0.0064	56284	0.1371	Total body bone mineral density || id:ebi-a-GCST005348	Total body bone mineral density	Total body bone mineral density || ||	TRUE	igd	0.0085	62892	2.70402e-10	117510621	7	ebi-a-GCST006867	Type 2 diabetes || id:ebi-a-GCST006867	TRUE	reported	igd	1	TRUE
rs13330951	G	A	G	A	-0.0456	0.0085	0.488314	0.4769	FALSE	FALSE	FALSE	ebi-a-GCST005348	16	69563842	0.0058	56284	0.1419	Total body bone mineral density || id:ebi-a-GCST005348	Total body bone mineral density	Total body bone mineral density || ||	TRUE	igd	0.0081	62892	1.53801e-08	69563842	16	ebi-a-GCST006867	Type 2 diabetes || id:ebi-a-GCST006867	TRUE	reported	igd	1	TRUE
rs13389219	T	C	T	C	-0.0722	-0.0018	0.394368	0.4181	FALSE	FALSE	FALSE	ebi-a-GCST005348	2	165528876	0.0058	56284	0.7535	Total body bone mineral density || id:ebi-a-GCST005348	Total body bone mineral density	Total body bone mineral density || ||	TRUE	igd	0.0074	62892	2.1062e-22	165528876	2	ebi-a-GCST006867	Type 2 diabetes || id:ebi-a-GCST006867	TRUE	reported	igd	1	TRUE
rs1359790	A	G	A	G	-0.0796	-0.0109	0.2867	0.2716	FALSE	FALSE	FALSE	ebi-a-GCST005348	13	80717156	0.0064	56284	0.0893696	Total body bone mineral density || id:ebi-a-GCST005348	Total body bone mineral density	Total body bone mineral density || ||	TRUE	igd	0.008	62892	2.79512e-23	80717156	13	ebi-a-GCST006867	Type 2 diabetes || id:ebi-a-GCST006867	TRUE	reported	igd	1	TRUE
rs1496653	G	A	G	A	-0.0769	-0.0033	0.204782	0.2179	FALSE	FALSE	FALSE	ebi-a-GCST005348	3	23454790	0.0069	56284	0.630001	Total body bone mineral density || id:ebi-a-GCST005348	Total body bone mineral density	Total body bone mineral density || ||	TRUE	igd	0.0088	62892	2.57217e-18	23454790	3	ebi-a-GCST006867	Type 2 diabetes || id:ebi-a-GCST006867	TRUE	reported	igd	1	TRUE
rs1552224	C	A	C	A	-0.1034	-0.0105	0.15421	0.1547	FALSE	FALSE	FALSE	ebi-a-GCST005348	11	72433098	0.0079	56284	0.1842	Total body bone mineral density || id:ebi-a-GCST005348	Total body bone mineral density	Total body bone mineral density || ||	TRUE	igd	0.0101	62892	8.63575e-25	72433098	11	ebi-a-GCST006867	Type 2 diabetes || id:ebi-a-GCST006867	TRUE	reported	igd	1	TRUE
rs16988333	G	A	G	A	-0.0745	0.0258	0.0904035	0.0819	FALSE	FALSE	FALSE	ebi-a-GCST005348	22	30552813	0.0102	56284	0.01181	Total body bone mineral density || id:ebi-a-GCST005348	Total body bone mineral density	Total body bone mineral density || ||	TRUE	igd	0.013	62892	9.16896e-09	30552813	22	ebi-a-GCST006867	Type 2 diabetes || id:ebi-a-GCST006867	TRUE	reported	igd	1	TRUE
rs17086692	T	G	T	G	-0.0467	0.0055	0.313426	0.3096	FALSE	FALSE	FALSE	ebi-a-GCST005348	4	53134293	0.0061	56284	0.374	Total body bone mineral density || id:ebi-a-GCST005348	Total body bone mineral density	Total body bone mineral density || ||	TRUE	igd	0.0084	62892	2.48102e-08	53134293	4	ebi-a-GCST006867	Type 2 diabetes || id:ebi-a-GCST006867	TRUE	reported	igd	1	TRUE
rs17168486	T	C	T	C	0.0742	0.0079	0.173603	0.1842	FALSE	FALSE	FALSE	ebi-a-GCST005348	7	14898282	0.0074	56284	0.285	Total body bone mineral density || id:ebi-a-GCST005348	Total body bone mineral density	Total body bone mineral density || ||	TRUE	igd	0.0094	62892	2.17721e-15	14898282	7	ebi-a-GCST006867	Type 2 diabetes || id:ebi-a-GCST006867	TRUE	reported	igd	1	TRUE
rs17405722	A	G	A	G	0.087	-0.0171	0.0741526	0.0732	FALSE	FALSE	FALSE	ebi-a-GCST005348	17	40542501	0.0108	56284	0.1128	Total body bone mineral density || id:ebi-a-GCST005348	Total body bone mineral density	Total body bone mineral density || ||	TRUE	igd	0.0146	62892	2.27798e-09	40542501	17	ebi-a-GCST006867	Type 2 diabetes || id:ebi-a-GCST006867	TRUE	reported	igd	1	TRUE
rs17411031	G	C	G	C	-0.045	-0.0058	0.261729	0.2696	FALSE	TRUE	FALSE	ebi-a-GCST005348	8	19852310	0.0064	56284	0.3665	Total body bone mineral density || id:ebi-a-GCST005348	Total body bone mineral density	Total body bone mineral density || ||	TRUE	igd	0.0081	62892	3.03501e-08	19852310	8	ebi-a-GCST006867	Type 2 diabetes || id:ebi-a-GCST006867	TRUE	reported	igd	1	TRUE
rs1758632	G	C	G	C	0.0491	-0.0057	0.623407	0.6241	FALSE	TRUE	FALSE	ebi-a-GCST005348	9	34025640	0.0059	56284	0.3322	Total body bone mineral density || id:ebi-a-GCST005348	Total body bone mineral density	Total body bone mineral density || ||	TRUE	igd	0.0081	62892	1.36e-09	34025640	9	ebi-a-GCST006867	Type 2 diabetes || id:ebi-a-GCST006867	TRUE	reported	igd	1	TRUE
rs17631783	T	C	T	C	-0.0487	-0.0053	0.26346	0.2558	FALSE	FALSE	FALSE	ebi-a-GCST005348	17	61687600	0.0067	56284	0.4286	Total body bone mineral density || id:ebi-a-GCST005348	Total body bone mineral density	Total body bone mineral density || ||	TRUE	igd	0.0089	62892	3.94903e-08	61687600	17	ebi-a-GCST006867	Type 2 diabetes || id:ebi-a-GCST006867	TRUE	reported	igd	1	TRUE
rs17791513	G	A	G	A	-0.1027	-0.0045	0.0605985	0.0661	FALSE	FALSE	FALSE	ebi-a-GCST005348	9	81905590	0.0116	56284	0.6987	Total body bone mineral density || id:ebi-a-GCST005348	Total body bone mineral density	Total body bone mineral density || ||	TRUE	igd	0.0148	62892	4.61424e-12	81905590	9	ebi-a-GCST006867	Type 2 diabetes || id:ebi-a-GCST006867	TRUE	reported	igd	1	TRUE
rs1801214	T	C	T	C	0.0903	-0.001	0.599585	0.6128	FALSE	FALSE	FALSE	ebi-a-GCST005348	4	6303022	0.0058	56284	0.8642	Total body bone mineral density || id:ebi-a-GCST005348	Total body bone mineral density	Total body bone mineral density || ||	TRUE	igd	0.0074	62892	5.51569e-34	6303022	4	ebi-a-GCST006867	Type 2 diabetes || id:ebi-a-GCST006867	TRUE	reported	igd	1	TRUE
rs1899951	T	C	T	C	-0.1118	-0.0137	0.123288	0.1595	FALSE	FALSE	FALSE	ebi-a-GCST005348	3	12394840	0.0082	56284	0.0968389	Total body bone mineral density || id:ebi-a-GCST005348	Total body bone mineral density	Total body bone mineral density || ||	TRUE	igd	0.0109	62892	1.63682e-24	12394840	3	ebi-a-GCST006867	Type 2 diabetes || id:ebi-a-GCST006867	TRUE	reported	igd	1	TRUE
rs2058913	T	A	T	A	-0.0491	-0.0007	0.565008	0.5403	FALSE	TRUE	TRUE	ebi-a-GCST005348	15	63831869	0.0058	56284	0.8981	Total body bone mineral density || id:ebi-a-GCST005348	Total body bone mineral density	Total body bone mineral density || ||	TRUE	igd	0.0078	62892	3.26099e-10	63831869	15	ebi-a-GCST006867	Type 2 diabetes || id:ebi-a-GCST006867	TRUE	reported	igd	1	TRUE
rs2237892	T	C	T	C	-0.096	-0.0189	0.0624896	0.0712	FALSE	FALSE	FALSE	ebi-a-GCST005348	11	2839751	0.0117	56284	0.1073	Total body bone mineral density || id:ebi-a-GCST005348	Total body bone mineral density	Total body bone mineral density || ||	TRUE	igd	0.0157	62892	8.74601e-10	2839751	11	ebi-a-GCST006867	Type 2 diabetes || id:ebi-a-GCST006867	TRUE	reported	igd	1	TRUE
rs2246618	T	C	T	C	0.0513	0.0032	0.307253	0.3166	FALSE	FALSE	FALSE	ebi-a-GCST005348	6	31478986	0.0067	56284	0.6349	Total body bone mineral density || id:ebi-a-GCST005348	Total body bone mineral density	Total body bone mineral density || ||	TRUE	igd	0.0084	62892	1.20301e-09	31478986	6	ebi-a-GCST006867	Type 2 diabetes || id:ebi-a-GCST006867	TRUE	reported	igd	1	TRUE
rs2261181	T	C	T	C	0.0985	0.0056	0.09647	0.1089	FALSE	FALSE	FALSE	ebi-a-GCST005348	12	66212318	0.0093	56284	0.5455	Total body bone mineral density || id:ebi-a-GCST005348	Total body bone mineral density	Total body bone mineral density || ||	TRUE	igd	0.0118	62892	9.1791e-17	66212318	12	ebi-a-GCST006867	Type 2 diabetes || id:ebi-a-GCST006867	TRUE	reported	igd	1	TRUE
rs2294120	G	A	G	A	-0.0443	0.0063	0.455879	0.4528	FALSE	FALSE	FALSE	ebi-a-GCST005348	8	146003567	0.0058	56284	0.2759	Total body bone mineral density || id:ebi-a-GCST005348	Total body bone mineral density	Total body bone mineral density || ||	TRUE	igd	0.0079	62892	1.61801e-08	146003567	8	ebi-a-GCST006867	Type 2 diabetes || id:ebi-a-GCST006867	TRUE	reported	igd	1	TRUE
rs2296173	G	A	G	A	0.065	0.0159	0.212011	0.2044	FALSE	FALSE	FALSE	ebi-a-GCST005348	1	39913351	0.007	56284	0.0240902	Total body bone mineral density || id:ebi-a-GCST005348	Total body bone mineral density	Total body bone mineral density || ||	TRUE	igd	0.0087	62892	7.65773e-14	39913351	1	ebi-a-GCST006867	Type 2 diabetes || id:ebi-a-GCST006867	TRUE	reported	igd	1	TRUE
rs2299383	T	C	T	C	0.0412	0.0075	0.423455	0.4295	FALSE	FALSE	FALSE	ebi-a-GCST005348	7	103418846	0.0057	56284	0.1876	Total body bone mineral density || id:ebi-a-GCST005348	Total body bone mineral density	Total body bone mineral density || ||	TRUE	igd	0.0073	62892	1.49001e-08	103418846	7	ebi-a-GCST006867	Type 2 diabetes || id:ebi-a-GCST006867	TRUE	reported	igd	1	TRUE
rs243019	C	T	C	T	0.0566	0.0023	0.455831	0.4673	FALSE	FALSE	FALSE	ebi-a-GCST005348	2	60585806	0.0057	56284	0.6842	Total body bone mineral density || id:ebi-a-GCST005348	Total body bone mineral density	Total body bone mineral density || ||	TRUE	igd	0.0071	62892	2.28981e-15	60585806	2	ebi-a-GCST006867	Type 2 diabetes || id:ebi-a-GCST006867	TRUE	reported	igd	1	TRUE
rs2493394	G	A	G	A	0.073	-0.0122	0.107338	0.1276	FALSE	FALSE	FALSE	ebi-a-GCST005348	1	120471224	0.0088	56284	0.1663	Total body bone mineral density || id:ebi-a-GCST005348	Total body bone mineral density	Total body bone mineral density || ||	TRUE	igd	0.0113	62892	1.15101e-10	120471224	1	ebi-a-GCST006867	Type 2 diabetes || id:ebi-a-GCST006867	TRUE	reported	igd	1	TRUE
rs2796441	A	G	A	G	-0.0715	0.0042	0.416458	0.4037	FALSE	FALSE	FALSE	ebi-a-GCST005348	9	84308948	0.006	56284	0.4771	Total body bone mineral density || id:ebi-a-GCST005348	Total body bone mineral density	Total body bone mineral density || ||	TRUE	igd	0.0073	62892	1.962e-22	84308948	9	ebi-a-GCST006867	Type 2 diabetes || id:ebi-a-GCST006867	TRUE	reported	igd	1	TRUE
rs2820426	G	A	G	A	0.0521	0.0095	0.610058	0.5916	FALSE	FALSE	FALSE	ebi-a-GCST005348	1	219660535	0.0058	56284	0.1031	Total body bone mineral density || id:ebi-a-GCST005348	Total body bone mineral density	Total body bone mineral density || ||	TRUE	igd	0.0073	62892	1.30197e-12	219660535	1	ebi-a-GCST006867	Type 2 diabetes || id:ebi-a-GCST006867	TRUE	reported	igd	1	TRUE
rs2867125	C	T	C	T	0.0601	0.0211	0.827825	0.8362	FALSE	FALSE	FALSE	ebi-a-GCST005348	2	622827	0.0077	56284	0.00580698	Total body bone mineral density || id:ebi-a-GCST005348	Total body bone mineral density	Total body bone mineral density || ||	TRUE	igd	0.0096	62892	4.32504e-10	622827	2	ebi-a-GCST006867	Type 2 diabetes || id:ebi-a-GCST006867	TRUE	reported	igd	1	TRUE
rs2908282	A	G	A	G	0.0552	0.0006	0.177395	0.1858	FALSE	FALSE	FALSE	ebi-a-GCST005348	7	44248828	0.0074	56284	0.9397	Total body bone mineral density || id:ebi-a-GCST005348	Total body bone mineral density	Total body bone mineral density || ||	TRUE	igd	0.0094	62892	4.25001e-09	44248828	7	ebi-a-GCST006867	Type 2 diabetes || id:ebi-a-GCST006867	TRUE	reported	igd	1	TRUE
rs2925979	C	T	C	T	-0.0534	-0.0091	0.70085	0.6985	FALSE	FALSE	FALSE	ebi-a-GCST005348	16	81534790	0.0063	56284	0.1474	Total body bone mineral density || id:ebi-a-GCST005348	Total body bone mineral density	Total body bone mineral density || ||	TRUE	igd	0.0078	62892	9.0615e-12	81534790	16	ebi-a-GCST006867	Type 2 diabetes || id:ebi-a-GCST006867	TRUE	reported	igd	1	TRUE
rs2943656	G	A	G	A	0.0902	0.0131	0.635133	0.6343	FALSE	FALSE	FALSE	ebi-a-GCST005348	2	227121918	0.0059	56284	0.0257602	Total body bone mineral density || id:ebi-a-GCST005348	Total body bone mineral density	Total body bone mineral density || ||	TRUE	igd	0.0074	62892	6.6973e-34	227121918	2	ebi-a-GCST006867	Type 2 diabetes || id:ebi-a-GCST006867	TRUE	reported	igd	1	TRUE
rs3217992	T	C	T	C	0.0527	0.0034	0.369901	0.3653	FALSE	FALSE	FALSE	ebi-a-GCST005348	9	22003223	0.0059	56284	0.559399	Total body bone mineral density || id:ebi-a-GCST005348	Total body bone mineral density	Total body bone mineral density || ||	TRUE	igd	0.0073	62892	7.2277e-13	22003223	9	ebi-a-GCST006867	Type 2 diabetes || id:ebi-a-GCST006867	TRUE	reported	igd	1	TRUE
rs340874	C	T	C	T	0.0626	0.0028	0.563904	0.5311	FALSE	FALSE	FALSE	ebi-a-GCST005348	1	214159256	0.0057	56284	0.6214	Total body bone mineral density || id:ebi-a-GCST005348	Total body bone mineral density	Total body bone mineral density || ||	TRUE	igd	0.0073	62892	8.40621e-18	214159256	1	ebi-a-GCST006867	Type 2 diabetes || id:ebi-a-GCST006867	TRUE	reported	igd	1	TRUE
rs348330	A	G	A	G	-0.0487	0.0113	0.633451	0.6009	FALSE	FALSE	FALSE	ebi-a-GCST005348	1	229672955	0.0061	56284	0.0613098	Total body bone mineral density || id:ebi-a-GCST005348	Total body bone mineral density	Total body bone mineral density || ||	TRUE	igd	0.0081	62892	1.86402e-09	229672955	1	ebi-a-GCST006867	Type 2 diabetes || id:ebi-a-GCST006867	TRUE	reported	igd	1	TRUE
rs3756784	G	T	G	T	0.0505	0.0104	0.185838	0.2373	FALSE	FALSE	FALSE	ebi-a-GCST005348	6	131950233	0.0071	56284	0.14	Total body bone mineral density || id:ebi-a-GCST005348	Total body bone mineral density	Total body bone mineral density || ||	TRUE	igd	0.0091	62892	2.58899e-08	131950233	6	ebi-a-GCST006867	Type 2 diabetes || id:ebi-a-GCST006867	TRUE	reported	igd	1	TRUE
rs3802177	A	G	A	G	-0.1217	-0.0012	0.311281	0.3026	FALSE	FALSE	FALSE	ebi-a-GCST005348	8	118185025	0.0063	56284	0.8473	Total body bone mineral density || id:ebi-a-GCST005348	Total body bone mineral density	Total body bone mineral density || ||	TRUE	igd	0.008	62892	2.32113e-52	118185025	8	ebi-a-GCST006867	Type 2 diabetes || id:ebi-a-GCST006867	TRUE	reported	igd	1	TRUE
rs459193	G	A	G	A	0.0711	0.0058	0.745338	0.7285	FALSE	FALSE	FALSE	ebi-a-GCST005348	5	55806751	0.0065	56284	0.3737	Total body bone mineral density || id:ebi-a-GCST005348	Total body bone mineral density	Total body bone mineral density || ||	TRUE	igd	0.0083	62892	8.80846e-18	55806751	5	ebi-a-GCST006867	Type 2 diabetes || id:ebi-a-GCST006867	TRUE	reported	igd	1	TRUE
rs4622883	G	A	G	A	-0.0435	-0.0112	0.508544	0.5078	FALSE	FALSE	FALSE	ebi-a-GCST005348	3	152188290	0.0057	56284	0.0475094	Total body bone mineral density || id:ebi-a-GCST005348	Total body bone mineral density	Total body bone mineral density || ||	TRUE	igd	0.0078	62892	3.01599e-08	152188290	3	ebi-a-GCST006867	Type 2 diabetes || id:ebi-a-GCST006867	TRUE	reported	igd	1	TRUE
rs4686471	C	T	C	T	0.0534	-0.002	0.609775	0.6216	FALSE	FALSE	FALSE	ebi-a-GCST005348	3	187740899	0.0058	56284	0.7294	Total body bone mineral density || id:ebi-a-GCST005348	Total body bone mineral density	Total body bone mineral density || ||	TRUE	igd	0.0081	62892	4.28154e-11	187740899	3	ebi-a-GCST006867	Type 2 diabetes || id:ebi-a-GCST006867	TRUE	reported	igd	1	TRUE
rs4812829	A	G	A	G	0.0532	0.0093	0.160871	0.1773	FALSE	FALSE	FALSE	ebi-a-GCST005348	20	42989267	0.0076	56284	0.2172	Total body bone mineral density || id:ebi-a-GCST005348	Total body bone mineral density	Total body bone mineral density || ||	TRUE	igd	0.0095	62892	2.44298e-08	42989267	20	ebi-a-GCST006867	Type 2 diabetes || id:ebi-a-GCST006867	TRUE	reported	igd	1	TRUE
rs4823182	G	A	G	A	0.0482	-0.0004	0.335748	0.3631	FALSE	FALSE	FALSE	ebi-a-GCST005348	22	44377442	0.006	56284	0.945	Total body bone mineral density || id:ebi-a-GCST005348	Total body bone mineral density	Total body bone mineral density || ||	TRUE	igd	0.0077	62892	3.35799e-10	44377442	22	ebi-a-GCST006867	Type 2 diabetes || id:ebi-a-GCST006867	TRUE	reported	igd	1	TRUE
rs4865796	A	G	A	G	0.053	-0.0026	0.69309	0.7	FALSE	FALSE	FALSE	ebi-a-GCST005348	5	53272664	0.0062	56284	0.674099	Total body bone mineral density || id:ebi-a-GCST005348	Total body bone mineral density	Total body bone mineral density || ||	TRUE	igd	0.0078	62892	1.32892e-11	53272664	5	ebi-a-GCST006867	Type 2 diabetes || id:ebi-a-GCST006867	TRUE	reported	igd	1	TRUE
rs516946	C	T	C	T	0.0824	0.004	0.760633	0.7668	FALSE	FALSE	FALSE	ebi-a-GCST005348	8	41519248	0.0067	56284	0.5566	Total body bone mineral density || id:ebi-a-GCST005348	Total body bone mineral density	Total body bone mineral density || ||	TRUE	igd	0.0085	62892	3.15864e-22	41519248	8	ebi-a-GCST006867	Type 2 diabetes || id:ebi-a-GCST006867	TRUE	reported	igd	1	TRUE
rs5215	T	C	T	C	-0.0678	-0.0035	0.639941	0.6509	FALSE	FALSE	FALSE	ebi-a-GCST005348	11	17408630	0.0059	56284	0.5551	Total body bone mineral density || id:ebi-a-GCST005348	Total body bone mineral density	Total body bone mineral density || ||	TRUE	igd	0.0073	62892	2.08882e-20	17408630	11	ebi-a-GCST006867	Type 2 diabetes || id:ebi-a-GCST006867	TRUE	reported	igd	1	TRUE
rs55966194	G	C	G	C	-0.0526	-0.0077	0.281312	0.2624	FALSE	TRUE	FALSE	ebi-a-GCST005348	20	45599090	0.0064	56284	0.2256	Total body bone mineral density || id:ebi-a-GCST005348	Total body bone mineral density	Total body bone mineral density || ||	TRUE	igd	0.0088	62892	2.25398e-09	45599090	20	ebi-a-GCST006867	Type 2 diabetes || id:ebi-a-GCST006867	TRUE	reported	igd	1	TRUE
rs576674	A	G	A	G	-0.0654	0.0096	0.832515	0.7992	FALSE	FALSE	FALSE	ebi-a-GCST005348	13	33554302	0.0075	56284	0.1999	Total body bone mineral density || id:ebi-a-GCST005348	Total body bone mineral density	Total body bone mineral density || ||	TRUE	igd	0.0097	62892	1.79184e-11	33554302	13	ebi-a-GCST006867	Type 2 diabetes || id:ebi-a-GCST006867	TRUE	reported	igd	1	TRUE
rs6059662	G	A	G	A	0.0446	0.0191	0.663176	0.6994	FALSE	FALSE	FALSE	ebi-a-GCST005348	20	32675727	0.0064	56284	0.002862	Total body bone mineral density || id:ebi-a-GCST005348	Total body bone mineral density	Total body bone mineral density || ||	TRUE	igd	0.0079	62892	1.51199e-08	32675727	20	ebi-a-GCST006867	Type 2 diabetes || id:ebi-a-GCST006867	TRUE	reported	igd	1	TRUE
rs61953351	T	G	T	G	-0.07	0.0113	0.249902	0.2535	FALSE	FALSE	FALSE	ebi-a-GCST005348	12	121456616	0.0065	56284	0.0829201	Total body bone mineral density || id:ebi-a-GCST005348	Total body bone mineral density	Total body bone mineral density || ||	TRUE	igd	0.0091	62892	1.97606e-14	121456616	12	ebi-a-GCST006867	Type 2 diabetes || id:ebi-a-GCST006867	TRUE	reported	igd	1	TRUE
rs622217	C	T	C	T	-0.0485	0.0049	0.483932	0.4826	FALSE	FALSE	FALSE	ebi-a-GCST005348	6	160766770	0.0058	56284	0.3952	Total body bone mineral density || id:ebi-a-GCST005348	Total body bone mineral density	Total body bone mineral density || ||	TRUE	igd	0.0077	62892	3.12903e-10	160766770	6	ebi-a-GCST006867	Type 2 diabetes || id:ebi-a-GCST006867	TRUE	reported	igd	1	TRUE
rs6494307	G	C	G	C	-0.0443	0.0061	0.426225	0.4426	FALSE	TRUE	TRUE	ebi-a-GCST005348	15	62394690	0.0057	56284	0.288	Total body bone mineral density || id:ebi-a-GCST005348	Total body bone mineral density	Total body bone mineral density || ||	TRUE	igd	0.0078	62892	1.66802e-08	62394690	15	ebi-a-GCST006867	Type 2 diabetes || id:ebi-a-GCST006867	TRUE	reported	igd	1	TRUE
rs6515236	C	A	C	A	-0.0504	0.0026	0.24933	0.2828	FALSE	FALSE	FALSE	ebi-a-GCST005348	20	22435749	0.0065	56284	0.6901	Total body bone mineral density || id:ebi-a-GCST005348	Total body bone mineral density	Total body bone mineral density || ||	TRUE	igd	0.0091	62892	3.34303e-08	22435749	20	ebi-a-GCST006867	Type 2 diabetes || id:ebi-a-GCST006867	TRUE	reported	igd	1	TRUE
rs67232546	T	C	T	C	0.0596	0.0031	0.209222	0.2041	FALSE	FALSE	FALSE	ebi-a-GCST005348	11	128398938	0.0071	56284	0.6615	Total body bone mineral density || id:ebi-a-GCST005348	Total body bone mineral density	Total body bone mineral density || ||	TRUE	igd	0.0096	62892	4.66101e-10	128398938	11	ebi-a-GCST006867	Type 2 diabetes || id:ebi-a-GCST006867	TRUE	reported	igd	1	TRUE
rs6767484	G	A	G	A	0.1209	0.0129	0.312261	0.3156	FALSE	FALSE	FALSE	ebi-a-GCST005348	3	185520578	0.0061	56284	0.0353297	Total body bone mineral density || id:ebi-a-GCST005348	Total body bone mineral density	Total body bone mineral density || ||	TRUE	igd	0.0076	62892	2.70085e-56	185520578	3	ebi-a-GCST006867	Type 2 diabetes || id:ebi-a-GCST006867	TRUE	reported	igd	1	TRUE
rs6785040	C	T	C	T	-0.0633	0.0059	0.15066	0.159	FALSE	FALSE	FALSE	ebi-a-GCST005348	3	63897915	0.008	56284	0.4632	Total body bone mineral density || id:ebi-a-GCST005348	Total body bone mineral density	Total body bone mineral density || ||	TRUE	igd	0.0111	62892	1.26401e-08	63897915	3	ebi-a-GCST006867	Type 2 diabetes || id:ebi-a-GCST006867	TRUE	reported	igd	1	TRUE
rs6795735	T	C	T	C	-0.0558	-0.0017	0.410912	0.4542	FALSE	FALSE	FALSE	ebi-a-GCST005348	3	64705365	0.0057	56284	0.7637	Total body bone mineral density || id:ebi-a-GCST005348	Total body bone mineral density	Total body bone mineral density || ||	TRUE	igd	0.0073	62892	1.63005e-14	64705365	3	ebi-a-GCST006867	Type 2 diabetes || id:ebi-a-GCST006867	TRUE	reported	igd	1	TRUE
rs6878122	A	G	A	G	-0.0564	-0.0038	0.681791	0.7148	FALSE	FALSE	FALSE	ebi-a-GCST005348	5	76427311	0.0062	56284	0.5399	Total body bone mineral density || id:ebi-a-GCST005348	Total body bone mineral density	Total body bone mineral density || ||	TRUE	igd	0.0079	62892	1.18796e-12	76427311	5	ebi-a-GCST006867	Type 2 diabetes || id:ebi-a-GCST006867	TRUE	reported	igd	1	TRUE
rs6960043	C	T	C	T	0.064	-0.003	0.521837	0.4899	FALSE	FALSE	FALSE	ebi-a-GCST005348	7	15052860	0.0057	56284	0.598199	Total body bone mineral density || id:ebi-a-GCST005348	Total body bone mineral density	Total body bone mineral density || ||	TRUE	igd	0.0071	62892	3.61077e-19	15052860	7	ebi-a-GCST006867	Type 2 diabetes || id:ebi-a-GCST006867	TRUE	reported	igd	1	TRUE
rs7144011	T	G	T	G	0.0482	-0.0105	0.221063	0.2059	FALSE	FALSE	FALSE	ebi-a-GCST005348	14	79940383	0.007	56284	0.1314	Total body bone mineral density || id:ebi-a-GCST005348	Total body bone mineral density	Total body bone mineral density || ||	TRUE	igd	0.0085	62892	1.63599e-08	79940383	14	ebi-a-GCST006867	Type 2 diabetes || id:ebi-a-GCST006867	TRUE	reported	igd	1	TRUE
rs7177055	A	G	A	G	0.0647	0.0015	0.718289	0.6829	FALSE	FALSE	FALSE	ebi-a-GCST005348	15	77832762	0.0062	56284	0.8116	Total body bone mineral density || id:ebi-a-GCST005348	Total body bone mineral density	Total body bone mineral density || ||	TRUE	igd	0.0079	62892	2.746e-16	77832762	15	ebi-a-GCST006867	Type 2 diabetes || id:ebi-a-GCST006867	TRUE	reported	igd	1	TRUE
rs7240767	C	T	C	T	0.0451	-0.0042	0.383677	0.4047	FALSE	FALSE	FALSE	ebi-a-GCST005348	18	7070642	0.0059	56284	0.477	Total body bone mineral density || id:ebi-a-GCST005348	Total body bone mineral density	Total body bone mineral density || ||	TRUE	igd	0.0081	62892	2.157e-08	7070642	18	ebi-a-GCST006867	Type 2 diabetes || id:ebi-a-GCST006867	TRUE	reported	igd	1	TRUE
rs72802358	C	G	C	G	-0.1168	-0.0136	0.101594	0.1175	FALSE	TRUE	FALSE	ebi-a-GCST005348	16	75243657	0.0095	56284	0.1547	Total body bone mineral density || id:ebi-a-GCST005348	Total body bone mineral density	Total body bone mineral density || ||	TRUE	igd	0.0133	62892	1.97015e-18	75243657	16	ebi-a-GCST006867	Type 2 diabetes || id:ebi-a-GCST006867	TRUE	reported	igd	1	TRUE
rs72892910	T	G	T	G	0.0648	-0.0121	0.172394	0.1725	FALSE	FALSE	FALSE	ebi-a-GCST005348	6	50816887	0.0076	56284	0.1106	Total body bone mineral density || id:ebi-a-GCST005348	Total body bone mineral density	Total body bone mineral density || ||	TRUE	igd	0.0099	62892	6.42836e-11	50816887	6	ebi-a-GCST006867	Type 2 diabetes || id:ebi-a-GCST006867	TRUE	reported	igd	1	TRUE
rs735949	C	T	C	T	-0.0711	0.003	0.14115	0.1351	FALSE	FALSE	FALSE	ebi-a-GCST005348	4	185716232	0.0083	56284	0.721499	Total body bone mineral density || id:ebi-a-GCST005348	Total body bone mineral density	Total body bone mineral density || ||	TRUE	igd	0.0106	62892	1.94581e-11	185716232	4	ebi-a-GCST006867	Type 2 diabetes || id:ebi-a-GCST006867	TRUE	reported	igd	1	TRUE
rs753270	C	T	C	T	0.0528	0.0055	0.583535	0.5811	FALSE	FALSE	FALSE	ebi-a-GCST005348	10	80964975	0.0058	56284	0.3364	Total body bone mineral density || id:ebi-a-GCST005348	Total body bone mineral density	Total body bone mineral density || ||	TRUE	igd	0.0079	62892	2.70209e-11	80964975	10	ebi-a-GCST006867	Type 2 diabetes || id:ebi-a-GCST006867	TRUE	reported	igd	1	TRUE
rs7561798	G	A	G	A	0.04	-0.0052	0.482171	0.4854	FALSE	FALSE	FALSE	ebi-a-GCST005348	2	228973660	0.0057	56284	0.3611	Total body bone mineral density || id:ebi-a-GCST005348	Total body bone mineral density	Total body bone mineral density || ||	TRUE	igd	0.0072	62892	2.79402e-08	228973660	2	ebi-a-GCST006867	Type 2 diabetes || id:ebi-a-GCST006867	TRUE	reported	igd	1	TRUE
rs7572970	G	A	G	A	0.059	-0.0099	0.722047	0.7247	FALSE	FALSE	FALSE	ebi-a-GCST005348	2	161136656	0.0063	56284	0.1163	Total body bone mineral density || id:ebi-a-GCST005348	Total body bone mineral density	Total body bone mineral density || ||	TRUE	igd	0.0087	62892	1.39091e-11	161136656	2	ebi-a-GCST006867	Type 2 diabetes || id:ebi-a-GCST006867	TRUE	reported	igd	1	TRUE
rs7607777	T	G	T	G	-0.137	0.0279	0.105906	0.0981	FALSE	FALSE	FALSE	ebi-a-GCST005348	2	43629931	0.0095	56284	0.003304	Total body bone mineral density || id:ebi-a-GCST005348	Total body bone mineral density	Total body bone mineral density || ||	TRUE	igd	0.0125	62892	9.39723e-28	43629931	2	ebi-a-GCST006867	Type 2 diabetes || id:ebi-a-GCST006867	TRUE	reported	igd	1	TRUE
rs7674212	T	G	T	G	-0.0465	-0.0097	0.408864	0.438	FALSE	FALSE	FALSE	ebi-a-GCST005348	4	103988899	0.0059	56284	0.0999908	Total body bone mineral density || id:ebi-a-GCST005348	Total body bone mineral density	Total body bone mineral density || ||	TRUE	igd	0.0075	62892	6.18201e-10	103988899	4	ebi-a-GCST006867	Type 2 diabetes || id:ebi-a-GCST006867	TRUE	reported	igd	1	TRUE
rs7685296	T	C	T	C	-0.0511	-0.0153	0.279365	0.3029	FALSE	FALSE	FALSE	ebi-a-GCST005348	4	153254121	0.0064	56284	0.0168399	Total body bone mineral density || id:ebi-a-GCST005348	Total body bone mineral density	Total body bone mineral density || ||	TRUE	igd	0.0081	62892	2.31702e-10	153254121	4	ebi-a-GCST006867	Type 2 diabetes || id:ebi-a-GCST006867	TRUE	reported	igd	1	TRUE
rs7729395	T	C	T	C	0.1373	0.0088	0.0509409	0.0473	FALSE	FALSE	FALSE	ebi-a-GCST005348	5	102100576	0.0151	56284	0.559099	Total body bone mineral density || id:ebi-a-GCST005348	Total body bone mineral density	Total body bone mineral density || ||	TRUE	igd	0.016	62892	1.10103e-17	102100576	5	ebi-a-GCST006867	Type 2 diabetes || id:ebi-a-GCST006867	TRUE	reported	igd	1	TRUE
rs7756992	G	A	G	A	0.1297	-0.0044	0.266896	0.2955	FALSE	FALSE	FALSE	ebi-a-GCST005348	6	20679709	0.0063	56284	0.4821	Total body bone mineral density || id:ebi-a-GCST005348	Total body bone mineral density	Total body bone mineral density || ||	TRUE	igd	0.0078	62892	5.99929e-62	20679709	6	ebi-a-GCST006867	Type 2 diabetes || id:ebi-a-GCST006867	TRUE	reported	igd	1	TRUE
rs7786095	G	A	G	A	-0.0743	-0.0107	0.10386	0.1028	FALSE	FALSE	FALSE	ebi-a-GCST005348	7	156983847	0.0092	56284	0.2463	Total body bone mineral density || id:ebi-a-GCST005348	Total body bone mineral density	Total body bone mineral density || ||	TRUE	igd	0.0129	62892	9.64295e-09	156983847	7	ebi-a-GCST006867	Type 2 diabetes || id:ebi-a-GCST006867	TRUE	reported	igd	1	TRUE
rs780094	C	T	C	T	0.0692	0.0301	0.612845	0.6228	FALSE	FALSE	FALSE	ebi-a-GCST005348	2	27741237	0.0058	56284	2.54203e-07	Total body bone mineral density || id:ebi-a-GCST005348	Total body bone mineral density	Total body bone mineral density || ||	TRUE	igd	0.0074	62892	5.15941e-21	27741237	2	ebi-a-GCST006867	Type 2 diabetes || id:ebi-a-GCST006867	TRUE	reported	igd	1	TRUE
rs7845219	C	T	C	T	-0.0422	0.0073	0.492786	0.4817	FALSE	FALSE	FALSE	ebi-a-GCST005348	8	95937502	0.0057	56284	0.2013	Total body bone mineral density || id:ebi-a-GCST005348	Total body bone mineral density	Total body bone mineral density || ||	TRUE	igd	0.0072	62892	4.54496e-09	95937502	8	ebi-a-GCST006867	Type 2 diabetes || id:ebi-a-GCST006867	TRUE	reported	igd	1	TRUE
rs7903146	T	C	T	C	0.3059	0.0167	0.291585	0.2861	FALSE	FALSE	FALSE	ebi-a-GCST005348	10	114758349	0.0063	56284	0.00795207	Total body bone mineral density || id:ebi-a-GCST005348	Total body bone mineral density	Total body bone mineral density || ||	TRUE	igd	0.0077	62892	1e-200	114758349	10	ebi-a-GCST006867	Type 2 diabetes || id:ebi-a-GCST006867	TRUE	reported	igd	1	TRUE
rs7929543	C	A	C	A	0.0828	0.014	0.0831599	0.1015	FALSE	FALSE	FALSE	ebi-a-GCST005348	11	49351026	0.01	56284	0.1634	Total body bone mineral density || id:ebi-a-GCST005348	Total body bone mineral density	Total body bone mineral density || ||	TRUE	igd	0.0138	62892	2.19902e-09	49351026	11	ebi-a-GCST006867	Type 2 diabetes || id:ebi-a-GCST006867	TRUE	reported	igd	1	TRUE
rs7955901	T	C	T	C	-0.0444	-0.004	0.556668	0.5473	FALSE	FALSE	FALSE	ebi-a-GCST005348	12	71433293	0.0057	56284	0.4841	Total body bone mineral density || id:ebi-a-GCST005348	Total body bone mineral density	Total body bone mineral density || ||	TRUE	igd	0.0072	62892	7.16094e-10	71433293	12	ebi-a-GCST006867	Type 2 diabetes || id:ebi-a-GCST006867	TRUE	reported	igd	1	TRUE
rs8068804	A	G	A	G	0.0587	0.0122	0.325097	0.3235	FALSE	FALSE	FALSE	ebi-a-GCST005348	17	3985864	0.0061	56284	0.0469602	Total body bone mineral density || id:ebi-a-GCST005348	Total body bone mineral density	Total body bone mineral density || ||	TRUE	igd	0.0078	62892	4.41062e-14	3985864	17	ebi-a-GCST006867	Type 2 diabetes || id:ebi-a-GCST006867	TRUE	reported	igd	1	TRUE
rs8108269	G	T	G	T	0.0644	0.0057	0.281015	0.2997	FALSE	FALSE	FALSE	ebi-a-GCST005348	19	46158513	0.0064	56284	0.3698	Total body bone mineral density || id:ebi-a-GCST005348	Total body bone mineral density	Total body bone mineral density || ||	TRUE	igd	0.0079	62892	3.11387e-16	46158513	19	ebi-a-GCST006867	Type 2 diabetes || id:ebi-a-GCST006867	TRUE	reported	igd	1	TRUE
rs825476	T	C	T	C	0.0524	-0.0021	0.580549	0.5687	FALSE	FALSE	FALSE	ebi-a-GCST005348	12	124568456	0.0057	56284	0.7076	Total body bone mineral density || id:ebi-a-GCST005348	Total body bone mineral density	Total body bone mineral density || ||	TRUE	igd	0.0073	62892	6.80456e-13	124568456	12	ebi-a-GCST006867	Type 2 diabetes || id:ebi-a-GCST006867	TRUE	reported	igd	1	TRUE
rs840967	A	C	A	C	-0.0497	-0.0109	0.605922	0.6134	FALSE	FALSE	FALSE	ebi-a-GCST005348	2	65701757	0.0058	56284	0.0592994	Total body bone mineral density || id:ebi-a-GCST005348	Total body bone mineral density	Total body bone mineral density || ||	TRUE	igd	0.008	62892	5.44202e-10	65701757	2	ebi-a-GCST006867	Type 2 diabetes || id:ebi-a-GCST006867	TRUE	reported	igd	1	TRUE
rs849135	A	G	A	G	-0.0999	-0.0209	0.499052	0.4625	FALSE	FALSE	FALSE	ebi-a-GCST005348	7	28196413	0.0057	56284	0.0002117	Total body bone mineral density || id:ebi-a-GCST005348	Total body bone mineral density	Total body bone mineral density || ||	TRUE	igd	0.0072	62892	1.04112e-43	28196413	7	ebi-a-GCST006867	Type 2 diabetes || id:ebi-a-GCST006867	TRUE	reported	igd	1	TRUE
rs853974	C	T	C	T	-0.0601	-0.0279	0.737586	0.7326	FALSE	FALSE	FALSE	ebi-a-GCST005348	6	127068983	0.0064	56284	1.39801e-05	Total body bone mineral density || id:ebi-a-GCST005348	Total body bone mineral density	Total body bone mineral density || ||	TRUE	igd	0.0088	62892	7.85778e-12	127068983	6	ebi-a-GCST006867	Type 2 diabetes || id:ebi-a-GCST006867	TRUE	reported	igd	1	TRUE
rs9369425	A	G	A	G	-0.0546	0.0021	0.708185	0.7089	FALSE	FALSE	FALSE	ebi-a-GCST005348	6	43810974	0.0064	56284	0.7437	Total body bone mineral density || id:ebi-a-GCST005348	Total body bone mineral density	Total body bone mineral density || ||	TRUE	igd	0.0085	62892	1.12899e-10	43810974	6	ebi-a-GCST006867	Type 2 diabetes || id:ebi-a-GCST006867	TRUE	reported	igd	1	TRUE
rs963740	T	A	T	A	-0.0479	-0.0026	0.294299	0.3012	FALSE	TRUE	FALSE	ebi-a-GCST005348	13	51096095	0.0062	56284	0.674899	Total body bone mineral density || id:ebi-a-GCST005348	Total body bone mineral density	Total body bone mineral density || ||	TRUE	igd	0.0086	62892	2.23198e-08	51096095	13	ebi-a-GCST006867	Type 2 diabetes || id:ebi-a-GCST006867	TRUE	reported	igd	1	TRUE
rs9844972	C	G	C	G	0.0956	-0.0062	0.0697229	0.0676	FALSE	TRUE	FALSE	ebi-a-GCST005348	3	150097635	0.0118	56284	0.5988	Total body bone mineral density || id:ebi-a-GCST005348	Total body bone mineral density	Total body bone mineral density || ||	TRUE	igd	0.0148	62892	1.02601e-10	150097635	3	ebi-a-GCST006867	Type 2 diabetes || id:ebi-a-GCST006867	TRUE	reported	igd	1	TRUE
rs9894220	G	A	G	A	-0.0585	0.0085	0.43374	0.4202	FALSE	FALSE	FALSE	ebi-a-GCST005348	17	46989154	0.0058	56284	0.1422	Total body bone mineral density || id:ebi-a-GCST005348	Total body bone mineral density	Total body bone mineral density || ||	TRUE	igd	0.0079	62892	1.51705e-13	46989154	17	ebi-a-GCST006867	Type 2 diabetes || id:ebi-a-GCST006867	TRUE	reported	igd	1	TRUE
rs9928094	G	A	G	A	0.1045	-0.0121	0.42602	0.4189	FALSE	FALSE	FALSE	ebi-a-GCST005348	16	53799905	0.0058	56284	0.0354903	Total body bone mineral density || id:ebi-a-GCST005348	Total body bone mineral density	Total body bone mineral density || ||	TRUE	igd	0.0072	62892	3.58922e-47	53799905	16	ebi-a-GCST006867	Type 2 diabetes || id:ebi-a-GCST006867	TRUE	reported	igd	1	TRUE
rs993380	G	A	G	A	-0.0507	0.0034	0.66555	0.6537	FALSE	FALSE	FALSE	ebi-a-GCST005348	4	83584496	0.0059	56284	0.5701	Total body bone mineral density || id:ebi-a-GCST005348	Total body bone mineral density	Total body bone mineral density || ||	TRUE	igd	0.0081	62892	4.58701e-10	83584496	4	ebi-a-GCST006867	Type 2 diabetes || id:ebi-a-GCST006867	TRUE	reported	igd	1	TRUE
rs9940149	A	G	A	G	-0.058	0.0034	0.178556	0.2233	FALSE	FALSE	FALSE	ebi-a-GCST005348	16	300641	0.0074	56284	0.6468	Total body bone mineral density || id:ebi-a-GCST005348	Total body bone mineral density	Total body bone mineral density || ||	TRUE	igd	0.0095	62892	9.29095e-10	300641	16	ebi-a-GCST006867	Type 2 diabetes || id:ebi-a-GCST006867	TRUE	reported	igd	1	TRUE

## Sheet: S2
Table S2. Mendelian randomization (MR) analysis of DM2 and FN-BMD
SNP	effect_allele.exposure	other_allele.exposure	effect_allele.outcome	other_allele.outcome	beta.exposure	beta.outcome	eaf.exposure	eaf.outcome	remove	palindromic	ambiguous	id.outcome	chr	pos	se.outcome	samplesize.outcome	pval.outcome	outcome	originalname.outcome	outcome.deprecated	mr_keep.outcome	data_source.outcome	se.exposure	samplesize.exposure	pval.exposure	pos.exposure	chr.exposure	id.exposure	exposure	mr_keep.exposure	pval_origin.exposure	data_source.exposure	action	mr_keep
rs10087241	A	G	A	G	-0.0475	0.003625	0.594893	0.609944	FALSE	FALSE	FALSE	ieu-a-980	8	30863722	0.007615	49988	0.641353	Femoral neck bone mineral density || id:ieu-a-980	Femoral neck bone mineral density	Femoral neck bone mineral density || ||	TRUE	igd	0.008	62892	2.79602e-09	30863722	8	ebi-a-GCST006867	Type 2 diabetes || id:ebi-a-GCST006867	TRUE	reported	igd	1	TRUE
rs1050226	G	A	G	A	-0.0491	0.007085	0.406792	0.381782	FALSE	FALSE	FALSE	ieu-a-980	6	7281654	0.007618	49988	0.362753	Femoral neck bone mineral density || id:ieu-a-980	Femoral neck bone mineral density	Femoral neck bone mineral density || ||	TRUE	igd	0.0074	62892	3.34195e-11	7281654	6	ebi-a-GCST006867	Type 2 diabetes || id:ebi-a-GCST006867	TRUE	reported	igd	1	TRUE
rs1063355	G	T	G	T	0.0709	-0.006962	0.602436	0.779395	FALSE	FALSE	FALSE	ieu-a-980	6	32627714	0.011119	49988	0.54013	Femoral neck bone mineral density || id:ieu-a-980	Femoral neck bone mineral density	Femoral neck bone mineral density || ||	TRUE	igd	0.0079	62892	3.71535e-19	32627714	6	ebi-a-GCST006867	Type 2 diabetes || id:ebi-a-GCST006867	TRUE	reported	igd	1	TRUE
rs10740322	A	G	A	G	0.0477	0.003764	0.687104	0.648449	FALSE	FALSE	FALSE	ieu-a-980	10	71485458	0.008051	49988	0.647336	Femoral neck bone mineral density || id:ieu-a-980	Femoral neck bone mineral density	Femoral neck bone mineral density || ||	TRUE	igd	0.0085	62892	2.10902e-08	71485458	10	ebi-a-GCST006867	Type 2 diabetes || id:ebi-a-GCST006867	TRUE	reported	igd	1	TRUE
rs10830963	G	C	G	C	0.0909	0.004925	0.275768	0.275338	FALSE	TRUE	FALSE	ieu-a-980	11	92708710	0.008534	49988	0.572325	Femoral neck bone mineral density || id:ieu-a-980	Femoral neck bone mineral density	Femoral neck bone mineral density || ||	TRUE	igd	0.008	62892	5.84655e-30	92708710	11	ebi-a-GCST006867	Type 2 diabetes || id:ebi-a-GCST006867	TRUE	reported	igd	1	TRUE
rs11098676	C	T	C	T	0.054	0.000287	0.787639	0.738345	FALSE	FALSE	FALSE	ieu-a-980	4	123833154	0.009602	49988	0.976624	Femoral neck bone mineral density || id:ieu-a-980	Femoral neck bone mineral density	Femoral neck bone mineral density || ||	TRUE	igd	0.0096	62892	2.02698e-08	123833154	4	ebi-a-GCST006867	Type 2 diabetes || id:ebi-a-GCST006867	TRUE	reported	igd	1	TRUE
rs11107116	T	G	T	G	0.0467	0.002919	0.219714	0.205648	FALSE	FALSE	FALSE	ieu-a-980	12	93978504	0.008967	49988	0.750069	Femoral neck bone mineral density || id:ieu-a-980	Femoral neck bone mineral density	Femoral neck bone mineral density || ||	TRUE	igd	0.0085	62892	3.74999e-08	93978504	12	ebi-a-GCST006867	Type 2 diabetes || id:ebi-a-GCST006867	TRUE	reported	igd	1	TRUE
rs11257655	T	C	T	C	0.0737	0.008228	0.206773	0.247733	FALSE	FALSE	FALSE	ieu-a-980	10	12307894	0.009221	49988	0.382606	Femoral neck bone mineral density || id:ieu-a-980	Femoral neck bone mineral density	Femoral neck bone mineral density || ||	TRUE	igd	0.0087	62892	1.96607e-17	12307894	10	ebi-a-GCST006867	Type 2 diabetes || id:ebi-a-GCST006867	TRUE	reported	igd	1	TRUE
rs1127655	T	C	T	C	-0.0438	-0.004087	0.529064	0.547017	FALSE	FALSE	FALSE	ieu-a-980	1	117530507	0.007476	49988	0.592736	Femoral neck bone mineral density || id:ieu-a-980	Femoral neck bone mineral density	Femoral neck bone mineral density || ||	TRUE	igd	0.0079	62892	2.47098e-08	117530507	1	ebi-a-GCST006867	Type 2 diabetes || id:ebi-a-GCST006867	TRUE	reported	igd	1	TRUE
rs11925227	A	G	A	G	-0.0534	0.004826	0.183439	0.168099	FALSE	FALSE	FALSE	ieu-a-980	3	170766618	0.009814	49988	0.630427	Femoral neck bone mineral density || id:ieu-a-980	Femoral neck bone mineral density	Femoral neck bone mineral density || ||	TRUE	igd	0.0095	62892	2.24999e-08	170766618	3	ebi-a-GCST006867	Type 2 diabetes || id:ebi-a-GCST006867	TRUE	reported	igd	1	TRUE
rs11926707	C	T	C	T	0.0463	-0.001571	0.625556	0.570963	FALSE	FALSE	FALSE	ieu-a-980	3	46925539	0.007896	49988	0.845671	Femoral neck bone mineral density || id:ieu-a-980	Femoral neck bone mineral density	Femoral neck bone mineral density || ||	TRUE	igd	0.0082	62892	1.68601e-08	46925539	3	ebi-a-GCST006867	Type 2 diabetes || id:ebi-a-GCST006867	TRUE	reported	igd	1	TRUE
rs12088739	G	A	G	A	-0.0884	0.02507	0.0898481	0.103739	FALSE	FALSE	FALSE	ieu-a-980	1	51506886	0.013085	49988	0.0608387	Femoral neck bone mineral density || id:ieu-a-980	Femoral neck bone mineral density	Femoral neck bone mineral density || ||	TRUE	igd	0.013	62892	9.79264e-12	51506886	1	ebi-a-GCST006867	Type 2 diabetes || id:ebi-a-GCST006867	TRUE	reported	igd	1	TRUE
rs12299509	G	A	G	A	0.0467	-0.004024	0.478622	0.445505	FALSE	FALSE	FALSE	ieu-a-980	12	4406281	0.007814	49988	0.614371	Femoral neck bone mineral density || id:ieu-a-980	Femoral neck bone mineral density	Femoral neck bone mineral density || ||	TRUE	igd	0.0073	62892	2.08699e-10	4406281	12	ebi-a-GCST006867	Type 2 diabetes || id:ebi-a-GCST006867	TRUE	reported	igd	1	TRUE
rs12617659	T	C	T	C	-0.0685	-0.010339	0.147238	0.143596	FALSE	FALSE	FALSE	ieu-a-980	2	121309759	0.010764	49988	0.347291	Femoral neck bone mineral density || id:ieu-a-980	Femoral neck bone mineral density	Femoral neck bone mineral density || ||	TRUE	igd	0.0103	62892	2.82683e-11	121309759	2	ebi-a-GCST006867	Type 2 diabetes || id:ebi-a-GCST006867	TRUE	reported	igd	1	TRUE
rs12910825	G	A	G	A	0.0517	-0.007322	0.360391	0.514161	FALSE	FALSE	FALSE	ieu-a-980	15	91511260	0.008258	49988	0.385646	Femoral neck bone mineral density || id:ieu-a-980	Femoral neck bone mineral density	Femoral neck bone mineral density || ||	TRUE	igd	0.0074	62892	2.16421e-12	91511260	15	ebi-a-GCST006867	Type 2 diabetes || id:ebi-a-GCST006867	TRUE	reported	igd	1	TRUE
rs12945601	C	T	C	T	-0.048	-0.009454	0.613603	0.460302	FALSE	FALSE	FALSE	ieu-a-980	17	17653411	0.007704	49988	0.229867	Femoral neck bone mineral density || id:ieu-a-980	Femoral neck bone mineral density	Femoral neck bone mineral density || ||	TRUE	igd	0.008	62892	1.71799e-09	17653411	17	ebi-a-GCST006867	Type 2 diabetes || id:ebi-a-GCST006867	TRUE	reported	igd	1	TRUE
rs12970134	A	G	A	G	0.0555	0.010563	0.26512	0.242641	FALSE	FALSE	FALSE	ieu-a-980	18	57884750	0.008668	49988	0.233099	Femoral neck bone mineral density || id:ieu-a-980	Femoral neck bone mineral density	Femoral neck bone mineral density || ||	TRUE	igd	0.008	62892	5.30884e-12	57884750	18	ebi-a-GCST006867	Type 2 diabetes || id:ebi-a-GCST006867	TRUE	reported	igd	1	TRUE
rs13234269	A	T	A	T	-0.0583	-0.008224	0.492515	0.424582	FALSE	TRUE	TRUE	ieu-a-980	7	130429186	0.007498	49988	0.283176	Femoral neck bone mineral density || id:ieu-a-980	Femoral neck bone mineral density	Femoral neck bone mineral density || ||	TRUE	igd	0.0078	62892	6.9775e-14	130429186	7	ebi-a-GCST006867	Type 2 diabetes || id:ebi-a-GCST006867	TRUE	reported	igd	1	TRUE
rs13239186	T	C	T	C	0.0539	0.001383	0.302029	0.253381	FALSE	FALSE	FALSE	ieu-a-980	7	117510621	0.00823	49988	0.869384	Femoral neck bone mineral density || id:ieu-a-980	Femoral neck bone mineral density	Femoral neck bone mineral density || ||	TRUE	igd	0.0085	62892	2.70402e-10	117510621	7	ebi-a-GCST006867	Type 2 diabetes || id:ebi-a-GCST006867	TRUE	reported	igd	1	TRUE
rs13330951	G	A	G	A	-0.0456	0.001659	0.488314	0.412092	FALSE	FALSE	FALSE	ieu-a-980	16	69563842	0.007483	49988	0.828301	Femoral neck bone mineral density || id:ieu-a-980	Femoral neck bone mineral density	Femoral neck bone mineral density || ||	TRUE	igd	0.0081	62892	1.53801e-08	69563842	16	ebi-a-GCST006867	Type 2 diabetes || id:ebi-a-GCST006867	TRUE	reported	igd	1	TRUE
rs1496653	G	A	G	A	-0.0769	0.003215	0.204782	0.229356	FALSE	FALSE	FALSE	ieu-a-980	3	23454790	0.009297	49988	0.735077	Femoral neck bone mineral density || id:ieu-a-980	Femoral neck bone mineral density	Femoral neck bone mineral density || ||	TRUE	igd	0.0088	62892	2.57217e-18	23454790	3	ebi-a-GCST006867	Type 2 diabetes || id:ebi-a-GCST006867	TRUE	reported	igd	1	TRUE
rs1552224	C	A	C	A	-0.1034	-0.003231	0.15421	0.129515	FALSE	FALSE	FALSE	ieu-a-980	11	72433098	0.010436	49988	0.761967	Femoral neck bone mineral density || id:ieu-a-980	Femoral neck bone mineral density	Femoral neck bone mineral density || ||	TRUE	igd	0.0101	62892	8.63575e-25	72433098	11	ebi-a-GCST006867	Type 2 diabetes || id:ebi-a-GCST006867	TRUE	reported	igd	1	TRUE
rs16988333	G	A	G	A	-0.0745	-0.010055	0.0904035	0.0688942	FALSE	FALSE	FALSE	ieu-a-980	22	30552813	0.013418	49988	0.463426	Femoral neck bone mineral density || id:ieu-a-980	Femoral neck bone mineral density	Femoral neck bone mineral density || ||	TRUE	igd	0.013	62892	9.16896e-09	30552813	22	ebi-a-GCST006867	Type 2 diabetes || id:ebi-a-GCST006867	TRUE	reported	igd	1	TRUE
rs17086692	T	G	T	G	-0.0467	0.00401	0.313426	0.294193	FALSE	FALSE	FALSE	ieu-a-980	4	53134293	0.008055	49988	0.626173	Femoral neck bone mineral density || id:ieu-a-980	Femoral neck bone mineral density	Femoral neck bone mineral density || ||	TRUE	igd	0.0084	62892	2.48102e-08	53134293	4	ebi-a-GCST006867	Type 2 diabetes || id:ebi-a-GCST006867	TRUE	reported	igd	1	TRUE
rs17405722	A	G	A	G	0.087	0.017466	0.0741526	0.0658711	FALSE	FALSE	FALSE	ieu-a-980	17	40542501	0.015024	49988	0.255291	Femoral neck bone mineral density || id:ieu-a-980	Femoral neck bone mineral density	Femoral neck bone mineral density || ||	TRUE	igd	0.0146	62892	2.27798e-09	40542501	17	ebi-a-GCST006867	Type 2 diabetes || id:ebi-a-GCST006867	TRUE	reported	igd	1	TRUE
rs17411031	G	C	G	C	-0.045	-0.008399	0.261729	0.257518	FALSE	TRUE	FALSE	ieu-a-980	8	19852310	0.008507	49988	0.333977	Femoral neck bone mineral density || id:ieu-a-980	Femoral neck bone mineral density	Femoral neck bone mineral density || ||	TRUE	igd	0.0081	62892	3.03501e-08	19852310	8	ebi-a-GCST006867	Type 2 diabetes || id:ebi-a-GCST006867	TRUE	reported	igd	1	TRUE
rs1758632	G	C	G	C	0.0491	0.002008	0.623407	0.62864	FALSE	TRUE	FALSE	ieu-a-980	9	34025640	0.007785	49988	0.800694	Femoral neck bone mineral density || id:ieu-a-980	Femoral neck bone mineral density	Femoral neck bone mineral density || ||	TRUE	igd	0.0081	62892	1.36e-09	34025640	9	ebi-a-GCST006867	Type 2 diabetes || id:ebi-a-GCST006867	TRUE	reported	igd	1	TRUE
rs17631783	T	C	T	C	-0.0487	-0.006922	0.26346	0.223787	FALSE	FALSE	FALSE	ieu-a-980	17	61687600	0.008593	49988	0.430617	Femoral neck bone mineral density || id:ieu-a-980	Femoral neck bone mineral density	Femoral neck bone mineral density || ||	TRUE	igd	0.0089	62892	3.94903e-08	61687600	17	ebi-a-GCST006867	Type 2 diabetes || id:ebi-a-GCST006867	TRUE	reported	igd	1	TRUE
rs17791513	G	A	G	A	-0.1027	-0.009798	0.0605985	0.0711217	FALSE	FALSE	FALSE	ieu-a-980	9	81905590	0.015629	49988	0.539635	Femoral neck bone mineral density || id:ieu-a-980	Femoral neck bone mineral density	Femoral neck bone mineral density || ||	TRUE	igd	0.0148	62892	4.61424e-12	81905590	9	ebi-a-GCST006867	Type 2 diabetes || id:ebi-a-GCST006867	TRUE	reported	igd	1	TRUE
rs1899951	T	C	T	C	-0.1118	0.010293	0.123288	0.172076	FALSE	FALSE	FALSE	ieu-a-980	3	12394840	0.011839	49988	0.394939	Femoral neck bone mineral density || id:ieu-a-980	Femoral neck bone mineral density	Femoral neck bone mineral density || ||	TRUE	igd	0.0109	62892	1.63682e-24	12394840	3	ebi-a-GCST006867	Type 2 diabetes || id:ebi-a-GCST006867	TRUE	reported	igd	1	TRUE
rs2058913	T	A	T	A	-0.0491	0.016321	0.565008	0.486078	FALSE	TRUE	TRUE	ieu-a-980	15	63831869	0.007615	49988	0.0360006	Femoral neck bone mineral density || id:ieu-a-980	Femoral neck bone mineral density	Femoral neck bone mineral density || ||	TRUE	igd	0.0078	62892	3.26099e-10	63831869	15	ebi-a-GCST006867	Type 2 diabetes || id:ebi-a-GCST006867	TRUE	reported	igd	1	TRUE
rs2237892	T	C	T	C	-0.096	0.025018	0.0624896	0.0950676	FALSE	FALSE	FALSE	ieu-a-980	11	2839751	0.015757	49988	0.120298	Femoral neck bone mineral density || id:ieu-a-980	Femoral neck bone mineral density	Femoral neck bone mineral density || ||	TRUE	igd	0.0157	62892	8.74601e-10	2839751	11	ebi-a-GCST006867	Type 2 diabetes || id:ebi-a-GCST006867	TRUE	reported	igd	1	TRUE
rs2246618	T	C	T	C	0.0513	0.002683	0.307253	0.30008	FALSE	FALSE	FALSE	ieu-a-980	6	31478986	0.008336	49988	0.752861	Femoral neck bone mineral density || id:ieu-a-980	Femoral neck bone mineral density	Femoral neck bone mineral density || ||	TRUE	igd	0.0084	62892	1.20301e-09	31478986	6	ebi-a-GCST006867	Type 2 diabetes || id:ebi-a-GCST006867	TRUE	reported	igd	1	TRUE
rs2299383	T	C	T	C	0.0412	0.010609	0.423455	0.421082	FALSE	FALSE	FALSE	ieu-a-980	7	103418846	0.007551	49988	0.169219	Femoral neck bone mineral density || id:ieu-a-980	Femoral neck bone mineral density	Femoral neck bone mineral density || ||	TRUE	igd	0.0073	62892	1.49001e-08	103418846	7	ebi-a-GCST006867	Type 2 diabetes || id:ebi-a-GCST006867	TRUE	reported	igd	1	TRUE
rs243019	C	T	C	T	0.0566	0.004923	0.455831	0.474224	FALSE	FALSE	FALSE	ieu-a-980	2	60585806	0.007525	49988	0.522134	Femoral neck bone mineral density || id:ieu-a-980	Femoral neck bone mineral density	Femoral neck bone mineral density || ||	TRUE	igd	0.0071	62892	2.28981e-15	60585806	2	ebi-a-GCST006867	Type 2 diabetes || id:ebi-a-GCST006867	TRUE	reported	igd	1	TRUE
rs2493394	G	A	G	A	0.073	0.009691	0.107338	0.139777	FALSE	FALSE	FALSE	ieu-a-980	1	120471224	0.012088	49988	0.432802	Femoral neck bone mineral density || id:ieu-a-980	Femoral neck bone mineral density	Femoral neck bone mineral density || ||	TRUE	igd	0.0113	62892	1.15101e-10	120471224	1	ebi-a-GCST006867	Type 2 diabetes || id:ebi-a-GCST006867	TRUE	reported	igd	1	TRUE
rs2796441	A	G	A	G	-0.0715	0.008296	0.416458	0.41066	FALSE	FALSE	FALSE	ieu-a-980	9	84308948	0.007726	49988	0.293395	Femoral neck bone mineral density || id:ieu-a-980	Femoral neck bone mineral density	Femoral neck bone mineral density || ||	TRUE	igd	0.0073	62892	1.962e-22	84308948	9	ebi-a-GCST006867	Type 2 diabetes || id:ebi-a-GCST006867	TRUE	reported	igd	1	TRUE
rs2820426	G	A	G	A	0.0521	0.000814	0.610058	0.557279	FALSE	FALSE	FALSE	ieu-a-980	1	219660535	0.007765	49988	0.918331	Femoral neck bone mineral density || id:ieu-a-980	Femoral neck bone mineral density	Femoral neck bone mineral density || ||	TRUE	igd	0.0073	62892	1.30197e-12	219660535	1	ebi-a-GCST006867	Type 2 diabetes || id:ebi-a-GCST006867	TRUE	reported	igd	1	TRUE
rs2867125	C	T	C	T	0.0601	0.001929	0.827825	0.841687	FALSE	FALSE	FALSE	ieu-a-980	2	622827	0.010051	49988	0.851037	Femoral neck bone mineral density || id:ieu-a-980	Femoral neck bone mineral density	Femoral neck bone mineral density || ||	TRUE	igd	0.0096	62892	4.32504e-10	622827	2	ebi-a-GCST006867	Type 2 diabetes || id:ebi-a-GCST006867	TRUE	reported	igd	1	TRUE
rs2908282	A	G	A	G	0.0552	0.018607	0.177395	0.187828	FALSE	FALSE	FALSE	ieu-a-980	7	44248828	0.010941	49988	0.0961059	Femoral neck bone mineral density || id:ieu-a-980	Femoral neck bone mineral density	Femoral neck bone mineral density || ||	TRUE	igd	0.0094	62892	4.25001e-09	44248828	7	ebi-a-GCST006867	Type 2 diabetes || id:ebi-a-GCST006867	TRUE	reported	igd	1	TRUE
rs2925979	C	T	C	T	-0.0534	-0.020241	0.70085	0.701114	FALSE	FALSE	FALSE	ieu-a-980	16	81534790	0.008172	49988	0.01539	Femoral neck bone mineral density || id:ieu-a-980	Femoral neck bone mineral density	Femoral neck bone mineral density || ||	TRUE	igd	0.0078	62892	9.0615e-12	81534790	16	ebi-a-GCST006867	Type 2 diabetes || id:ebi-a-GCST006867	TRUE	reported	igd	1	TRUE
rs2943656	G	A	G	A	0.0902	-0.009988	0.635133	0.670485	FALSE	FALSE	FALSE	ieu-a-980	2	227121918	0.007768	49988	0.208306	Femoral neck bone mineral density || id:ieu-a-980	Femoral neck bone mineral density	Femoral neck bone mineral density || ||	TRUE	igd	0.0074	62892	6.6973e-34	227121918	2	ebi-a-GCST006867	Type 2 diabetes || id:ebi-a-GCST006867	TRUE	reported	igd	1	TRUE
rs3217992	T	C	T	C	0.0527	-0.001161	0.369901	0.359427	FALSE	FALSE	FALSE	ieu-a-980	9	22003223	0.007752	49988	0.883471	Femoral neck bone mineral density || id:ieu-a-980	Femoral neck bone mineral density	Femoral neck bone mineral density || ||	TRUE	igd	0.0073	62892	7.2277e-13	22003223	9	ebi-a-GCST006867	Type 2 diabetes || id:ebi-a-GCST006867	TRUE	reported	igd	1	TRUE
rs340874	C	T	C	T	0.0626	0.009602	0.563904	0.492124	FALSE	FALSE	FALSE	ieu-a-980	1	214159256	0.007554	49988	0.213558	Femoral neck bone mineral density || id:ieu-a-980	Femoral neck bone mineral density	Femoral neck bone mineral density || ||	TRUE	igd	0.0073	62892	8.40621e-18	214159256	1	ebi-a-GCST006867	Type 2 diabetes || id:ebi-a-GCST006867	TRUE	reported	igd	1	TRUE
rs348330	A	G	A	G	-0.0487	0.001445	0.633451	0.537072	FALSE	FALSE	FALSE	ieu-a-980	1	229672955	0.008376	49988	0.865905	Femoral neck bone mineral density || id:ieu-a-980	Femoral neck bone mineral density	Femoral neck bone mineral density || ||	TRUE	igd	0.0081	62892	1.86402e-09	229672955	1	ebi-a-GCST006867	Type 2 diabetes || id:ebi-a-GCST006867	TRUE	reported	igd	1	TRUE
rs3756784	G	T	G	T	0.0505	-0.006149	0.185838	0.278282	FALSE	FALSE	FALSE	ieu-a-980	6	131950233	0.009683	49988	0.534411	Femoral neck bone mineral density || id:ieu-a-980	Femoral neck bone mineral density	Femoral neck bone mineral density || ||	TRUE	igd	0.0091	62892	2.58899e-08	131950233	6	ebi-a-GCST006867	Type 2 diabetes || id:ebi-a-GCST006867	TRUE	reported	igd	1	TRUE
rs459193	G	A	G	A	0.0711	0.011425	0.745338	0.692761	FALSE	FALSE	FALSE	ieu-a-980	5	55806751	0.008583	49988	0.192738	Femoral neck bone mineral density || id:ieu-a-980	Femoral neck bone mineral density	Femoral neck bone mineral density || ||	TRUE	igd	0.0083	62892	8.80846e-18	55806751	5	ebi-a-GCST006867	Type 2 diabetes || id:ebi-a-GCST006867	TRUE	reported	igd	1	TRUE
rs4622883	G	A	G	A	-0.0435	0.00754	0.508544	0.480191	FALSE	FALSE	FALSE	ieu-a-980	3	152188290	0.007531	49988	0.327294	Femoral neck bone mineral density || id:ieu-a-980	Femoral neck bone mineral density	Femoral neck bone mineral density || ||	TRUE	igd	0.0078	62892	3.01599e-08	152188290	3	ebi-a-GCST006867	Type 2 diabetes || id:ebi-a-GCST006867	TRUE	reported	igd	1	TRUE
rs4686471	C	T	C	T	0.0534	0.009218	0.609775	0.681623	FALSE	FALSE	FALSE	ieu-a-980	3	187740899	0.007664	49988	0.239259	Femoral neck bone mineral density || id:ieu-a-980	Femoral neck bone mineral density	Femoral neck bone mineral density || ||	TRUE	igd	0.0081	62892	4.28154e-11	187740899	3	ebi-a-GCST006867	Type 2 diabetes || id:ebi-a-GCST006867	TRUE	reported	igd	1	TRUE
rs4812829	A	G	A	G	0.0532	0.004062	0.160871	0.193954	FALSE	FALSE	FALSE	ieu-a-980	20	42989267	0.010066	49988	0.692961	Femoral neck bone mineral density || id:ieu-a-980	Femoral neck bone mineral density	Femoral neck bone mineral density || ||	TRUE	igd	0.0095	62892	2.44298e-08	42989267	20	ebi-a-GCST006867	Type 2 diabetes || id:ebi-a-GCST006867	TRUE	reported	igd	1	TRUE
rs55966194	G	C	G	C	-0.0526	-0.002033	0.281312	0.235959	FALSE	TRUE	FALSE	ieu-a-980	20	45599090	0.00829	49988	0.810346	Femoral neck bone mineral density || id:ieu-a-980	Femoral neck bone mineral density	Femoral neck bone mineral density || ||	TRUE	igd	0.0088	62892	2.25398e-09	45599090	20	ebi-a-GCST006867	Type 2 diabetes || id:ebi-a-GCST006867	TRUE	reported	igd	1	TRUE
rs576674	A	G	A	G	-0.0654	-0.003552	0.832515	0.772633	FALSE	FALSE	FALSE	ieu-a-980	13	33554302	0.01032	49988	0.736265	Femoral neck bone mineral density || id:ieu-a-980	Femoral neck bone mineral density	Femoral neck bone mineral density || ||	TRUE	igd	0.0097	62892	1.79184e-11	33554302	13	ebi-a-GCST006867	Type 2 diabetes || id:ebi-a-GCST006867	TRUE	reported	igd	1	TRUE
rs6059662	G	A	G	A	0.0446	0.00062	0.663176	0.722514	FALSE	FALSE	FALSE	ieu-a-980	20	32675727	0.009168	49988	0.947212	Femoral neck bone mineral density || id:ieu-a-980	Femoral neck bone mineral density	Femoral neck bone mineral density || ||	TRUE	igd	0.0079	62892	1.51199e-08	32675727	20	ebi-a-GCST006867	Type 2 diabetes || id:ebi-a-GCST006867	TRUE	reported	igd	1	TRUE
rs61953351	T	G	T	G	-0.07	-0.000973	0.249902	0.221877	FALSE	FALSE	FALSE	ieu-a-980	12	121456616	0.008663	49988	0.912493	Femoral neck bone mineral density || id:ieu-a-980	Femoral neck bone mineral density	Femoral neck bone mineral density || ||	TRUE	igd	0.0091	62892	1.97606e-14	121456616	12	ebi-a-GCST006867	Type 2 diabetes || id:ebi-a-GCST006867	TRUE	reported	igd	1	TRUE
rs6494307	G	C	G	C	-0.0443	0.008531	0.426225	0.446858	FALSE	TRUE	TRUE	ieu-a-980	15	62394690	0.007613	49988	0.272825	Femoral neck bone mineral density || id:ieu-a-980	Femoral neck bone mineral density	Femoral neck bone mineral density || ||	TRUE	igd	0.0078	62892	1.66802e-08	62394690	15	ebi-a-GCST006867	Type 2 diabetes || id:ebi-a-GCST006867	TRUE	reported	igd	1	TRUE
rs6515236	C	A	C	A	-0.0504	-0.008326	0.24933	0.337152	FALSE	FALSE	FALSE	ieu-a-980	20	22435749	0.008582	49988	0.342426	Femoral neck bone mineral density || id:ieu-a-980	Femoral neck bone mineral density	Femoral neck bone mineral density || ||	TRUE	igd	0.0091	62892	3.34303e-08	22435749	20	ebi-a-GCST006867	Type 2 diabetes || id:ebi-a-GCST006867	TRUE	reported	igd	1	TRUE
rs67232546	T	C	T	C	0.0596	0.000599	0.209222	0.196977	FALSE	FALSE	FALSE	ieu-a-980	11	128398938	0.009235	49988	0.949418	Femoral neck bone mineral density || id:ieu-a-980	Femoral neck bone mineral density	Femoral neck bone mineral density || ||	TRUE	igd	0.0096	62892	4.66101e-10	128398938	11	ebi-a-GCST006867	Type 2 diabetes || id:ebi-a-GCST006867	TRUE	reported	igd	1	TRUE
rs6767484	G	A	G	A	0.1209	0.008937	0.312261	0.349085	FALSE	FALSE	FALSE	ieu-a-980	3	185520578	0.009075	49988	0.335252	Femoral neck bone mineral density || id:ieu-a-980	Femoral neck bone mineral density	Femoral neck bone mineral density || ||	TRUE	igd	0.0076	62892	2.70085e-56	185520578	3	ebi-a-GCST006867	Type 2 diabetes || id:ebi-a-GCST006867	TRUE	reported	igd	1	TRUE
rs6785040	C	T	C	T	-0.0633	-0.009563	0.15066	0.189499	FALSE	FALSE	FALSE	ieu-a-980	3	63897915	0.010257	49988	0.361651	Femoral neck bone mineral density || id:ieu-a-980	Femoral neck bone mineral density	Femoral neck bone mineral density || ||	TRUE	igd	0.0111	62892	1.26401e-08	63897915	3	ebi-a-GCST006867	Type 2 diabetes || id:ebi-a-GCST006867	TRUE	reported	igd	1	TRUE
rs6795735	T	C	T	C	-0.0558	-0.01006	0.410912	0.528719	FALSE	FALSE	FALSE	ieu-a-980	3	64705365	0.008171	49988	0.228307	Femoral neck bone mineral density || id:ieu-a-980	Femoral neck bone mineral density	Femoral neck bone mineral density || ||	TRUE	igd	0.0073	62892	1.63005e-14	64705365	3	ebi-a-GCST006867	Type 2 diabetes || id:ebi-a-GCST006867	TRUE	reported	igd	1	TRUE
rs6960043	C	T	C	T	0.064	0.001523	0.521837	0.46786	FALSE	FALSE	FALSE	ieu-a-980	7	15052860	0.007499	49988	0.842523	Femoral neck bone mineral density || id:ieu-a-980	Femoral neck bone mineral density	Femoral neck bone mineral density || ||	TRUE	igd	0.0071	62892	3.61077e-19	15052860	7	ebi-a-GCST006867	Type 2 diabetes || id:ebi-a-GCST006867	TRUE	reported	igd	1	TRUE
rs7177055	A	G	A	G	0.0647	-0.002892	0.718289	0.618616	FALSE	FALSE	FALSE	ieu-a-980	15	77832762	0.008276	49988	0.732416	Femoral neck bone mineral density || id:ieu-a-980	Femoral neck bone mineral density	Femoral neck bone mineral density || ||	TRUE	igd	0.0079	62892	2.746e-16	77832762	15	ebi-a-GCST006867	Type 2 diabetes || id:ebi-a-GCST006867	TRUE	reported	igd	1	TRUE
rs7240767	C	T	C	T	0.0451	-0.007358	0.383677	0.469292	FALSE	FALSE	FALSE	ieu-a-980	18	7070642	0.007755	49988	0.353181	Femoral neck bone mineral density || id:ieu-a-980	Femoral neck bone mineral density	Femoral neck bone mineral density || ||	TRUE	igd	0.0081	62892	2.157e-08	7070642	18	ebi-a-GCST006867	Type 2 diabetes || id:ebi-a-GCST006867	TRUE	reported	igd	1	TRUE
rs72802358	C	G	C	G	-0.1168	-0.010972	0.101594	0.121082	FALSE	TRUE	FALSE	ieu-a-980	16	75243657	0.012116	49988	0.375595	Femoral neck bone mineral density || id:ieu-a-980	Femoral neck bone mineral density	Femoral neck bone mineral density || ||	TRUE	igd	0.0133	62892	1.97015e-18	75243657	16	ebi-a-GCST006867	Type 2 diabetes || id:ebi-a-GCST006867	TRUE	reported	igd	1	TRUE
rs753270	C	T	C	T	0.0528	0.000189	0.583535	0.605489	FALSE	FALSE	FALSE	ieu-a-980	10	80964975	0.007611	49988	0.980608	Femoral neck bone mineral density || id:ieu-a-980	Femoral neck bone mineral density	Femoral neck bone mineral density || ||	TRUE	igd	0.0079	62892	2.70209e-11	80964975	10	ebi-a-GCST006867	Type 2 diabetes || id:ebi-a-GCST006867	TRUE	reported	igd	1	TRUE
rs7572970	G	A	G	A	0.059	0.000616	0.722047	0.718218	FALSE	FALSE	FALSE	ieu-a-980	2	161136656	0.008322	49988	0.942251	Femoral neck bone mineral density || id:ieu-a-980	Femoral neck bone mineral density	Femoral neck bone mineral density || ||	TRUE	igd	0.0087	62892	1.39091e-11	161136656	2	ebi-a-GCST006867	Type 2 diabetes || id:ebi-a-GCST006867	TRUE	reported	igd	1	TRUE
rs7756992	G	A	G	A	0.1297	0.012955	0.266896	0.326253	FALSE	FALSE	FALSE	ieu-a-980	6	20679709	0.008773	49988	0.148496	Femoral neck bone mineral density || id:ieu-a-980	Femoral neck bone mineral density	Femoral neck bone mineral density || ||	TRUE	igd	0.0078	62892	5.99929e-62	20679709	6	ebi-a-GCST006867	Type 2 diabetes || id:ebi-a-GCST006867	TRUE	reported	igd	1	TRUE
rs7786095	G	A	G	A	-0.0743	-0.020491	0.10386	0.0983294	FALSE	FALSE	FALSE	ieu-a-980	7	156983847	0.012132	49988	0.0984011	Femoral neck bone mineral density || id:ieu-a-980	Femoral neck bone mineral density	Femoral neck bone mineral density || ||	TRUE	igd	0.0129	62892	9.64295e-09	156983847	7	ebi-a-GCST006867	Type 2 diabetes || id:ebi-a-GCST006867	TRUE	reported	igd	1	TRUE
rs780094	C	T	C	T	0.0692	0.015042	0.612845	0.647255	FALSE	FALSE	FALSE	ieu-a-980	2	27741237	0.007663	49988	0.0548025	Femoral neck bone mineral density || id:ieu-a-980	Femoral neck bone mineral density	Femoral neck bone mineral density || ||	TRUE	igd	0.0074	62892	5.15941e-21	27741237	2	ebi-a-GCST006867	Type 2 diabetes || id:ebi-a-GCST006867	TRUE	reported	igd	1	TRUE
rs7903146	T	C	T	C	0.3059	0.012597	0.291585	0.26611	FALSE	FALSE	FALSE	ieu-a-980	10	114758349	0.008559	49988	0.149857	Femoral neck bone mineral density || id:ieu-a-980	Femoral neck bone mineral density	Femoral neck bone mineral density || ||	TRUE	igd	0.0077	62892	1e-200	114758349	10	ebi-a-GCST006867	Type 2 diabetes || id:ebi-a-GCST006867	TRUE	reported	igd	1	TRUE
rs7929543	C	A	C	A	0.0828	0.012089	0.0831599	0.121798	FALSE	FALSE	FALSE	ieu-a-980	11	49351026	0.013762	49988	0.390052	Femoral neck bone mineral density || id:ieu-a-980	Femoral neck bone mineral density	Femoral neck bone mineral density || ||	TRUE	igd	0.0138	62892	2.19902e-09	49351026	11	ebi-a-GCST006867	Type 2 diabetes || id:ebi-a-GCST006867	TRUE	reported	igd	1	TRUE
rs7955901	T	C	T	C	-0.0444	-0.012182	0.556668	0.558075	FALSE	FALSE	FALSE	ieu-a-980	12	71433293	0.007584	49988	0.116042	Femoral neck bone mineral density || id:ieu-a-980	Femoral neck bone mineral density	Femoral neck bone mineral density || ||	TRUE	igd	0.0072	62892	7.16094e-10	71433293	12	ebi-a-GCST006867	Type 2 diabetes || id:ebi-a-GCST006867	TRUE	reported	igd	1	TRUE
rs8108269	G	T	G	T	0.0644	0.002087	0.281015	0.327049	FALSE	FALSE	FALSE	ieu-a-980	19	46158513	0.008259	49988	0.804673	Femoral neck bone mineral density || id:ieu-a-980	Femoral neck bone mineral density	Femoral neck bone mineral density || ||	TRUE	igd	0.0079	62892	3.11387e-16	46158513	19	ebi-a-GCST006867	Type 2 diabetes || id:ebi-a-GCST006867	TRUE	reported	igd	1	TRUE
rs840967	A	C	A	C	-0.0497	-0.00763	0.605922	0.631106	FALSE	FALSE	FALSE	ieu-a-980	2	65701757	0.007714	49988	0.333169	Femoral neck bone mineral density || id:ieu-a-980	Femoral neck bone mineral density	Femoral neck bone mineral density || ||	TRUE	igd	0.008	62892	5.44202e-10	65701757	2	ebi-a-GCST006867	Type 2 diabetes || id:ebi-a-GCST006867	TRUE	reported	igd	1	TRUE
rs849135	A	G	A	G	-0.0999	-0.004411	0.499052	0.406126	FALSE	FALSE	FALSE	ieu-a-980	7	28196413	0.008418	49988	0.608169	Femoral neck bone mineral density || id:ieu-a-980	Femoral neck bone mineral density	Femoral neck bone mineral density || ||	TRUE	igd	0.0072	62892	1.04112e-43	28196413	7	ebi-a-GCST006867	Type 2 diabetes || id:ebi-a-GCST006867	TRUE	reported	igd	1	TRUE
rs853974	C	T	C	T	-0.0601	-0.032487	0.737586	0.724264	FALSE	FALSE	FALSE	ieu-a-980	6	127068983	0.00847	49988	0.000175999	Femoral neck bone mineral density || id:ieu-a-980	Femoral neck bone mineral density	Femoral neck bone mineral density || ||	TRUE	igd	0.0088	62892	7.85778e-12	127068983	6	ebi-a-GCST006867	Type 2 diabetes || id:ebi-a-GCST006867	TRUE	reported	igd	1	TRUE
rs9369425	A	G	A	G	-0.0546	0.010923	0.708185	0.708115	FALSE	FALSE	FALSE	ieu-a-980	6	43810974	0.008229	49988	0.194017	Femoral neck bone mineral density || id:ieu-a-980	Femoral neck bone mineral density	Femoral neck bone mineral density || ||	TRUE	igd	0.0085	62892	1.12899e-10	43810974	6	ebi-a-GCST006867	Type 2 diabetes || id:ebi-a-GCST006867	TRUE	reported	igd	1	TRUE
rs963740	T	A	T	A	-0.0479	0.004503	0.294299	0.308751	FALSE	TRUE	FALSE	ieu-a-980	13	51096095	0.008121	49988	0.587447	Femoral neck bone mineral density || id:ieu-a-980	Femoral neck bone mineral density	Femoral neck bone mineral density || ||	TRUE	igd	0.0086	62892	2.23198e-08	51096095	13	ebi-a-GCST006867	Type 2 diabetes || id:ebi-a-GCST006867	TRUE	reported	igd	1	TRUE
rs9844972	C	G	C	G	0.0956	0.044654	0.0697229	0.0498807	FALSE	TRUE	FALSE	ieu-a-980	3	150097635	0.015001	49988	0.00359501	Femoral neck bone mineral density || id:ieu-a-980	Femoral neck bone mineral density	Femoral neck bone mineral density || ||	TRUE	igd	0.0148	62892	1.02601e-10	150097635	3	ebi-a-GCST006867	Type 2 diabetes || id:ebi-a-GCST006867	TRUE	reported	igd	1	TRUE
rs9894220	G	A	G	A	-0.0585	0.007177	0.43374	0.400796	FALSE	FALSE	FALSE	ieu-a-980	17	46989154	0.007587	49988	0.354653	Femoral neck bone mineral density || id:ieu-a-980	Femoral neck bone mineral density	Femoral neck bone mineral density || ||	TRUE	igd	0.0079	62892	1.51705e-13	46989154	17	ebi-a-GCST006867	Type 2 diabetes || id:ebi-a-GCST006867	TRUE	reported	igd	1	TRUE
rs993380	G	A	G	A	-0.0507	-0.016697	0.66555	0.639857	FALSE	FALSE	FALSE	ieu-a-980	4	83584496	0.007868	49988	0.0378669	Femoral neck bone mineral density || id:ieu-a-980	Femoral neck bone mineral density	Femoral neck bone mineral density || ||	TRUE	igd	0.0081	62892	4.58701e-10	83584496	4	ebi-a-GCST006867	Type 2 diabetes || id:ebi-a-GCST006867	TRUE	reported	igd	1	TRUE
rs9940149	A	G	A	G	-0.058	0.013312	0.178556	0.263246	FALSE	FALSE	FALSE	ieu-a-980	16	300641	0.009686	49988	0.17869	Femoral neck bone mineral density || id:ieu-a-980	Femoral neck bone mineral density	Femoral neck bone mineral density || ||	TRUE	igd	0.0095	62892	9.29095e-10	300641	16	ebi-a-GCST006867	Type 2 diabetes || id:ebi-a-GCST006867	TRUE	reported	igd	1	TRUE

## Sheet: S3
Table S3. Mendelian randomization (MR) analysis of DM2 and UF-BMD
SNP	effect_allele.exposure	other_allele.exposure	effect_allele.outcome	other_allele.outcome	beta.exposure	beta.outcome	eaf.exposure	eaf.outcome	remove	palindromic	ambiguous	id.outcome	chr	pos	se.outcome	samplesize.outcome	pval.outcome	outcome	originalname.outcome	outcome.deprecated	mr_keep.outcome	data_source.outcome	se.exposure	samplesize.exposure	pval.exposure	pos.exposure	chr.exposure	id.exposure	exposure	mr_keep.exposure
rs10077431	A	C	A	C	-0.0487	-0.0049171	0.214668	0.225123	FALSE	FALSE	FALSE	ebi-a-GCST90013422	5	112927686	0.0127493	21907	0.699737	Ultradistal forearm bone mineral density || id:ebi-a-GCST90013422	Ultradistal forearm bone mineral density	Ultradistal forearm bone mineral density || ||	TRUE	igd	0.0089	62892	4.75499e-08	112927686	5	ebi-a-GCST006867	Type 2 diabetes || id:ebi-a-GCST006867	TRUE
rs10087241	A	G	A	G	-0.0475	0.00446192	0.594893	0.624707	FALSE	FALSE	FALSE	ebi-a-GCST90013422	8	30863722	0.0109301	21907	0.683111	Ultradistal forearm bone mineral density || id:ebi-a-GCST90013422	Ultradistal forearm bone mineral density	Ultradistal forearm bone mineral density || ||	TRUE	igd	0.008	62892	2.79602e-09	30863722	8	ebi-a-GCST006867	Type 2 diabetes || id:ebi-a-GCST006867	TRUE
rs10100265	C	A	C	A	-0.0491	0.00564961	0.61049	0.587647	FALSE	FALSE	FALSE	ebi-a-GCST90013422	8	10633159	0.0110445	21907	0.608979	Ultradistal forearm bone mineral density || id:ebi-a-GCST90013422	Ultradistal forearm bone mineral density	Ultradistal forearm bone mineral density || ||	TRUE	igd	0.0079	62892	6.28796e-10	10633159	8	ebi-a-GCST006867	Type 2 diabetes || id:ebi-a-GCST006867	TRUE
rs10114341	C	T	C	T	-0.0409	-0.0183693	0.440754	0.456574	FALSE	FALSE	FALSE	ebi-a-GCST90013422	9	96919182	0.010678	21907	0.0853788	Ultradistal forearm bone mineral density || id:ebi-a-GCST90013422	Ultradistal forearm bone mineral density	Ultradistal forearm bone mineral density || ||	TRUE	igd	0.0072	62892	1.15101e-08	96919182	9	ebi-a-GCST006867	Type 2 diabetes || id:ebi-a-GCST006867	TRUE
rs10401969	C	T	C	T	0.0921	-0.0127799	0.0765858	0.090235	FALSE	FALSE	FALSE	ebi-a-GCST90013422	19	19407718	0.018623	21907	0.492561	Ultradistal forearm bone mineral density || id:ebi-a-GCST90013422	Ultradistal forearm bone mineral density	Ultradistal forearm bone mineral density || ||	TRUE	igd	0.0133	62892	4.13143e-12	19407718	19	ebi-a-GCST006867	Type 2 diabetes || id:ebi-a-GCST006867	TRUE
rs1050226	G	A	G	A	-0.0491	0.00139576	0.406792	0.424975	FALSE	FALSE	FALSE	ebi-a-GCST90013422	6	7281654	0.010807	21907	0.897236	Ultradistal forearm bone mineral density || id:ebi-a-GCST90013422	Ultradistal forearm bone mineral density	Ultradistal forearm bone mineral density || ||	TRUE	igd	0.0074	62892	3.34195e-11	7281654	6	ebi-a-GCST006867	Type 2 diabetes || id:ebi-a-GCST006867	TRUE
rs1061813	A	G	A	G	-0.0429	-0.0106377	0.537119	0.550858	FALSE	FALSE	FALSE	ebi-a-GCST90013422	5	14847331	0.0107719	21907	0.323375	Ultradistal forearm bone mineral density || id:ebi-a-GCST90013422	Ultradistal forearm bone mineral density	Ultradistal forearm bone mineral density || ||	TRUE	igd	0.0073	62892	3.37202e-09	14847331	5	ebi-a-GCST006867	Type 2 diabetes || id:ebi-a-GCST006867	TRUE
rs10740322	A	G	A	G	0.0477	-0.0104377	0.687104	0.665256	FALSE	FALSE	FALSE	ebi-a-GCST90013422	10	71485458	0.0112462	21907	0.353352	Ultradistal forearm bone mineral density || id:ebi-a-GCST90013422	Ultradistal forearm bone mineral density	Ultradistal forearm bone mineral density || ||	TRUE	igd	0.0085	62892	2.10902e-08	71485458	10	ebi-a-GCST006867	Type 2 diabetes || id:ebi-a-GCST006867	TRUE
rs10811661	C	T	C	T	-0.1569	0.0158663	0.173605	0.168404	FALSE	FALSE	FALSE	ebi-a-GCST90013422	9	22134094	0.0141725	21907	0.262923	Ultradistal forearm bone mineral density || id:ebi-a-GCST90013422	Ultradistal forearm bone mineral density	Ultradistal forearm bone mineral density || ||	TRUE	igd	0.0098	62892	4.13238e-58	22134094	9	ebi-a-GCST006867	Type 2 diabetes || id:ebi-a-GCST006867	TRUE
rs10830963	G	C	G	C	0.0909	0.0119092	0.275768	0.267663	FALSE	TRUE	FALSE	ebi-a-GCST90013422	11	92708710	0.0119581	21907	0.319293	Ultradistal forearm bone mineral density || id:ebi-a-GCST90013422	Ultradistal forearm bone mineral density	Ultradistal forearm bone mineral density || ||	TRUE	igd	0.008	62892	5.84655e-30	92708710	11	ebi-a-GCST006867	Type 2 diabetes || id:ebi-a-GCST006867	TRUE
rs10842994	T	C	T	C	-0.0755	-0.0123576	0.197025	0.201928	FALSE	FALSE	FALSE	ebi-a-GCST90013422	12	27965150	0.013319	21907	0.353501	Ultradistal forearm bone mineral density || id:ebi-a-GCST90013422	Ultradistal forearm bone mineral density	Ultradistal forearm bone mineral density || ||	TRUE	igd	0.0091	62892	1.01508e-16	27965150	12	ebi-a-GCST006867	Type 2 diabetes || id:ebi-a-GCST006867	TRUE
rs10974438	C	A	C	A	0.0591	0.0112396	0.351215	0.347051	FALSE	FALSE	FALSE	ebi-a-GCST90013422	9	4291928	0.0112275	21907	0.316786	Ultradistal forearm bone mineral density || id:ebi-a-GCST90013422	Ultradistal forearm bone mineral density	Ultradistal forearm bone mineral density || ||	TRUE	igd	0.0075	62892	3.01301e-15	4291928	9	ebi-a-GCST006867	Type 2 diabetes || id:ebi-a-GCST006867	TRUE
rs11098676	C	T	C	T	0.054	0.0174635	0.787639	0.771484	FALSE	FALSE	FALSE	ebi-a-GCST90013422	4	123833154	0.0126581	21907	0.167701	Ultradistal forearm bone mineral density || id:ebi-a-GCST90013422	Ultradistal forearm bone mineral density	Ultradistal forearm bone mineral density || ||	TRUE	igd	0.0096	62892	2.02698e-08	123833154	4	ebi-a-GCST006867	Type 2 diabetes || id:ebi-a-GCST006867	TRUE
rs11107116	T	G	T	G	0.0467	0.0477535	0.219714	0.19562	FALSE	FALSE	FALSE	ebi-a-GCST90013422	12	93978504	0.0133829	21907	0.000359385	Ultradistal forearm bone mineral density || id:ebi-a-GCST90013422	Ultradistal forearm bone mineral density	Ultradistal forearm bone mineral density || ||	TRUE	igd	0.0085	62892	3.74999e-08	93978504	12	ebi-a-GCST006867	Type 2 diabetes || id:ebi-a-GCST006867	TRUE
rs1111875	T	C	T	C	-0.0948	-7.33397e-05	0.408262	0.43609	FALSE	FALSE	FALSE	ebi-a-GCST90013422	10	94462882	0.0107085	21907	0.994536	Ultradistal forearm bone mineral density || id:ebi-a-GCST90013422	Ultradistal forearm bone mineral density	Ultradistal forearm bone mineral density || ||	TRUE	igd	0.0072	62892	3.61493e-39	94462882	10	ebi-a-GCST006867	Type 2 diabetes || id:ebi-a-GCST006867	TRUE
rs11257655	T	C	T	C	0.0737	-0.00560115	0.206773	0.198714	FALSE	FALSE	FALSE	ebi-a-GCST90013422	10	12307894	0.0133114	21907	0.673916	Ultradistal forearm bone mineral density || id:ebi-a-GCST90013422	Ultradistal forearm bone mineral density	Ultradistal forearm bone mineral density || ||	TRUE	igd	0.0087	62892	1.96607e-17	12307894	10	ebi-a-GCST006867	Type 2 diabetes || id:ebi-a-GCST006867	TRUE
rs1127655	T	C	T	C	-0.0438	0.0239778	0.529064	0.540124	FALSE	FALSE	FALSE	ebi-a-GCST90013422	1	117530507	0.0106546	21907	0.0244197	Ultradistal forearm bone mineral density || id:ebi-a-GCST90013422	Ultradistal forearm bone mineral density	Ultradistal forearm bone mineral density || ||	TRUE	igd	0.0079	62892	2.47098e-08	117530507	1	ebi-a-GCST006867	Type 2 diabetes || id:ebi-a-GCST006867	TRUE
rs11708067	G	A	G	A	-0.0965	-0.0123599	0.23899	0.229148	FALSE	FALSE	FALSE	ebi-a-GCST90013422	3	123065778	0.0126569	21907	0.328801	Ultradistal forearm bone mineral density || id:ebi-a-GCST90013422	Ultradistal forearm bone mineral density	Ultradistal forearm bone mineral density || ||	TRUE	igd	0.0086	62892	5.93335e-29	123065778	3	ebi-a-GCST006867	Type 2 diabetes || id:ebi-a-GCST006867	TRUE
rs11925227	A	G	A	G	-0.0534	0.00964344	0.183439	0.211078	FALSE	FALSE	FALSE	ebi-a-GCST90013422	3	170766618	0.0132528	21907	0.466827	Ultradistal forearm bone mineral density || id:ebi-a-GCST90013422	Ultradistal forearm bone mineral density	Ultradistal forearm bone mineral density || ||	TRUE	igd	0.0095	62892	2.24999e-08	170766618	3	ebi-a-GCST006867	Type 2 diabetes || id:ebi-a-GCST006867	TRUE
rs11926707	C	T	C	T	0.0463	-0.00387265	0.625556	0.648879	FALSE	FALSE	FALSE	ebi-a-GCST90013422	3	46925539	0.0115652	21907	0.737736	Ultradistal forearm bone mineral density || id:ebi-a-GCST90013422	Ultradistal forearm bone mineral density	Ultradistal forearm bone mineral density || ||	TRUE	igd	0.0082	62892	1.68601e-08	46925539	3	ebi-a-GCST006867	Type 2 diabetes || id:ebi-a-GCST006867	TRUE
rs12088739	G	A	G	A	-0.0884	-0.00789898	0.0898481	0.0988373	FALSE	FALSE	FALSE	ebi-a-GCST90013422	1	51506886	0.0179516	21907	0.659926	Ultradistal forearm bone mineral density || id:ebi-a-GCST90013422	Ultradistal forearm bone mineral density	Ultradistal forearm bone mineral density || ||	TRUE	igd	0.013	62892	9.79264e-12	51506886	1	ebi-a-GCST006867	Type 2 diabetes || id:ebi-a-GCST006867	TRUE
rs12617659	T	C	T	C	-0.0685	-0.00265339	0.147238	0.147	FALSE	FALSE	FALSE	ebi-a-GCST90013422	2	121309759	0.0149469	21907	0.859099	Ultradistal forearm bone mineral density || id:ebi-a-GCST90013422	Ultradistal forearm bone mineral density	Ultradistal forearm bone mineral density || ||	TRUE	igd	0.0103	62892	2.82683e-11	121309759	2	ebi-a-GCST006867	Type 2 diabetes || id:ebi-a-GCST006867	TRUE
rs12910825	G	A	G	A	0.0517	-0.00401135	0.360391	0.338801	FALSE	FALSE	FALSE	ebi-a-GCST90013422	15	91511260	0.01142	21907	0.725396	Ultradistal forearm bone mineral density || id:ebi-a-GCST90013422	Ultradistal forearm bone mineral density	Ultradistal forearm bone mineral density || ||	TRUE	igd	0.0074	62892	2.16421e-12	91511260	15	ebi-a-GCST006867	Type 2 diabetes || id:ebi-a-GCST006867	TRUE
rs12945601	C	T	C	T	-0.048	-0.00456756	0.613603	0.633023	FALSE	FALSE	FALSE	ebi-a-GCST90013422	17	17653411	0.0109756	21907	0.677295	Ultradistal forearm bone mineral density || id:ebi-a-GCST90013422	Ultradistal forearm bone mineral density	Ultradistal forearm bone mineral density || ||	TRUE	igd	0.008	62892	1.71799e-09	17653411	17	ebi-a-GCST006867	Type 2 diabetes || id:ebi-a-GCST006867	TRUE
rs12970134	A	G	A	G	0.0555	0.0340744	0.26512	0.299417	FALSE	FALSE	FALSE	ebi-a-GCST90013422	18	57884750	0.0116309	21907	0.00339344	Ultradistal forearm bone mineral density || id:ebi-a-GCST90013422	Ultradistal forearm bone mineral density	Ultradistal forearm bone mineral density || ||	TRUE	igd	0.008	62892	5.30884e-12	57884750	18	ebi-a-GCST006867	Type 2 diabetes || id:ebi-a-GCST006867	TRUE
rs13234269	A	T	A	T	-0.0583	0.0143409	0.492515	0.506248	FALSE	TRUE	TRUE	ebi-a-GCST90013422	7	130429186	0.0106794	21907	0.179316	Ultradistal forearm bone mineral density || id:ebi-a-GCST90013422	Ultradistal forearm bone mineral density	Ultradistal forearm bone mineral density || ||	TRUE	igd	0.0078	62892	6.9775e-14	130429186	7	ebi-a-GCST006867	Type 2 diabetes || id:ebi-a-GCST006867	TRUE
rs13239186	T	C	T	C	0.0539	0.0155255	0.302029	0.341605	FALSE	FALSE	FALSE	ebi-a-GCST90013422	7	117510621	0.0113468	21907	0.171225	Ultradistal forearm bone mineral density || id:ebi-a-GCST90013422	Ultradistal forearm bone mineral density	Ultradistal forearm bone mineral density || ||	TRUE	igd	0.0085	62892	2.70402e-10	117510621	7	ebi-a-GCST006867	Type 2 diabetes || id:ebi-a-GCST006867	TRUE
rs13330951	G	A	G	A	-0.0456	0.0145856	0.488314	0.502682	FALSE	FALSE	FALSE	ebi-a-GCST90013422	16	69563842	0.0107754	21907	0.175866	Ultradistal forearm bone mineral density || id:ebi-a-GCST90013422	Ultradistal forearm bone mineral density	Ultradistal forearm bone mineral density || ||	TRUE	igd	0.0081	62892	1.53801e-08	69563842	16	ebi-a-GCST006867	Type 2 diabetes || id:ebi-a-GCST006867	TRUE
rs13389219	T	C	T	C	-0.0722	-0.0129785	0.394368	0.406912	FALSE	FALSE	FALSE	ebi-a-GCST90013422	2	165528876	0.0107725	21907	0.228288	Ultradistal forearm bone mineral density || id:ebi-a-GCST90013422	Ultradistal forearm bone mineral density	Ultradistal forearm bone mineral density || ||	TRUE	igd	0.0074	62892	2.1062e-22	165528876	2	ebi-a-GCST006867	Type 2 diabetes || id:ebi-a-GCST006867	TRUE
rs1359790	A	G	A	G	-0.0796	0.023445	0.2867	0.280382	FALSE	FALSE	FALSE	ebi-a-GCST90013422	13	80717156	0.0118117	21907	0.0471563	Ultradistal forearm bone mineral density || id:ebi-a-GCST90013422	Ultradistal forearm bone mineral density	Ultradistal forearm bone mineral density || ||	TRUE	igd	0.008	62892	2.79512e-23	80717156	13	ebi-a-GCST006867	Type 2 diabetes || id:ebi-a-GCST006867	TRUE
rs1496653	G	A	G	A	-0.0769	-0.0085838	0.204782	0.24471	FALSE	FALSE	FALSE	ebi-a-GCST90013422	3	23454790	0.0122903	21907	0.484914	Ultradistal forearm bone mineral density || id:ebi-a-GCST90013422	Ultradistal forearm bone mineral density	Ultradistal forearm bone mineral density || ||	TRUE	igd	0.0088	62892	2.57217e-18	23454790	3	ebi-a-GCST006867	Type 2 diabetes || id:ebi-a-GCST006867	TRUE
rs1552224	C	A	C	A	-0.1034	-0.0224195	0.15421	0.174366	FALSE	FALSE	FALSE	ebi-a-GCST90013422	11	72433098	0.0140715	21907	0.111104	Ultradistal forearm bone mineral density || id:ebi-a-GCST90013422	Ultradistal forearm bone mineral density	Ultradistal forearm bone mineral density || ||	TRUE	igd	0.0101	62892	8.63575e-25	72433098	11	ebi-a-GCST006867	Type 2 diabetes || id:ebi-a-GCST006867	TRUE
rs16988333	G	A	G	A	-0.0745	-0.0124613	0.0904035	0.0720532	FALSE	FALSE	FALSE	ebi-a-GCST90013422	22	30552813	0.0206085	21907	0.545399	Ultradistal forearm bone mineral density || id:ebi-a-GCST90013422	Ultradistal forearm bone mineral density	Ultradistal forearm bone mineral density || ||	TRUE	igd	0.013	62892	9.16896e-09	30552813	22	ebi-a-GCST006867	Type 2 diabetes || id:ebi-a-GCST006867	TRUE
rs17086692	T	G	T	G	-0.0467	0.0095589	0.313426	0.302514	FALSE	FALSE	FALSE	ebi-a-GCST90013422	4	53134293	0.0116195	21907	0.4107	Ultradistal forearm bone mineral density || id:ebi-a-GCST90013422	Ultradistal forearm bone mineral density	Ultradistal forearm bone mineral density || ||	TRUE	igd	0.0084	62892	2.48102e-08	53134293	4	ebi-a-GCST006867	Type 2 diabetes || id:ebi-a-GCST006867	TRUE
rs17168486	T	C	T	C	0.0742	-0.00352996	0.173603	0.170733	FALSE	FALSE	FALSE	ebi-a-GCST90013422	7	14898282	0.0141632	21907	0.803179	Ultradistal forearm bone mineral density || id:ebi-a-GCST90013422	Ultradistal forearm bone mineral density	Ultradistal forearm bone mineral density || ||	TRUE	igd	0.0094	62892	2.17721e-15	14898282	7	ebi-a-GCST006867	Type 2 diabetes || id:ebi-a-GCST006867	TRUE
rs17405722	A	G	A	G	0.087	-0.011524	0.0741526	0.0934235	FALSE	FALSE	FALSE	ebi-a-GCST90013422	17	40542501	0.0184378	21907	0.531959	Ultradistal forearm bone mineral density || id:ebi-a-GCST90013422	Ultradistal forearm bone mineral density	Ultradistal forearm bone mineral density || ||	TRUE	igd	0.0146	62892	2.27798e-09	40542501	17	ebi-a-GCST006867	Type 2 diabetes || id:ebi-a-GCST006867	TRUE
rs17411031	G	C	G	C	-0.045	-0.0202412	0.261729	0.243867	FALSE	TRUE	FALSE	ebi-a-GCST90013422	8	19852310	0.0123786	21907	0.102011	Ultradistal forearm bone mineral density || id:ebi-a-GCST90013422	Ultradistal forearm bone mineral density	Ultradistal forearm bone mineral density || ||	TRUE	igd	0.0081	62892	3.03501e-08	19852310	8	ebi-a-GCST006867	Type 2 diabetes || id:ebi-a-GCST006867	TRUE
rs1758632	G	C	G	C	0.0491	0.0168262	0.623407	0.611766	FALSE	TRUE	FALSE	ebi-a-GCST90013422	9	34025640	0.0108178	21907	0.119848	Ultradistal forearm bone mineral density || id:ebi-a-GCST90013422	Ultradistal forearm bone mineral density	Ultradistal forearm bone mineral density || ||	TRUE	igd	0.0081	62892	1.36e-09	34025640	9	ebi-a-GCST006867	Type 2 diabetes || id:ebi-a-GCST006867	TRUE
rs17631783	T	C	T	C	-0.0487	0.017387	0.26346	0.289629	FALSE	FALSE	FALSE	ebi-a-GCST90013422	17	61687600	0.0117903	21907	0.140298	Ultradistal forearm bone mineral density || id:ebi-a-GCST90013422	Ultradistal forearm bone mineral density	Ultradistal forearm bone mineral density || ||	TRUE	igd	0.0089	62892	3.94903e-08	61687600	17	ebi-a-GCST006867	Type 2 diabetes || id:ebi-a-GCST006867	TRUE
rs17791513	G	A	G	A	-0.1027	0.042359	0.0605985	0.0707134	FALSE	FALSE	FALSE	ebi-a-GCST90013422	9	81905590	0.0209232	21907	0.042919	Ultradistal forearm bone mineral density || id:ebi-a-GCST90013422	Ultradistal forearm bone mineral density	Ultradistal forearm bone mineral density || ||	TRUE	igd	0.0148	62892	4.61424e-12	81905590	9	ebi-a-GCST006867	Type 2 diabetes || id:ebi-a-GCST006867	TRUE
rs1801214	T	C	T	C	0.0903	-0.0106915	0.599585	0.589209	FALSE	FALSE	FALSE	ebi-a-GCST90013422	4	6303022	0.0108437	21907	0.324151	Ultradistal forearm bone mineral density || id:ebi-a-GCST90013422	Ultradistal forearm bone mineral density	Ultradistal forearm bone mineral density || ||	TRUE	igd	0.0074	62892	5.51569e-34	6303022	4	ebi-a-GCST006867	Type 2 diabetes || id:ebi-a-GCST006867	TRUE
rs1899951	T	C	T	C	-0.1118	-0.00415017	0.123288	0.141573	FALSE	FALSE	FALSE	ebi-a-GCST90013422	3	12394840	0.0152917	21907	0.786082	Ultradistal forearm bone mineral density || id:ebi-a-GCST90013422	Ultradistal forearm bone mineral density	Ultradistal forearm bone mineral density || ||	TRUE	igd	0.0109	62892	1.63682e-24	12394840	3	ebi-a-GCST006867	Type 2 diabetes || id:ebi-a-GCST006867	TRUE
rs2058913	T	A	T	A	-0.0491	0.00136166	0.565008	0.535787	FALSE	TRUE	TRUE	ebi-a-GCST90013422	15	63831869	0.0106802	21907	0.898549	Ultradistal forearm bone mineral density || id:ebi-a-GCST90013422	Ultradistal forearm bone mineral density	Ultradistal forearm bone mineral density || ||	TRUE	igd	0.0078	62892	3.26099e-10	63831869	15	ebi-a-GCST006867	Type 2 diabetes || id:ebi-a-GCST006867	TRUE
rs2237892	T	C	T	C	-0.096	0.0262516	0.0624896	0.0629462	FALSE	FALSE	FALSE	ebi-a-GCST90013422	11	2839751	0.0219459	21907	0.23162	Ultradistal forearm bone mineral density || id:ebi-a-GCST90013422	Ultradistal forearm bone mineral density	Ultradistal forearm bone mineral density || ||	TRUE	igd	0.0157	62892	8.74601e-10	2839751	11	ebi-a-GCST006867	Type 2 diabetes || id:ebi-a-GCST006867	TRUE
rs2261181	T	C	T	C	0.0985	0.0261956	0.09647	0.0988979	FALSE	FALSE	FALSE	ebi-a-GCST90013422	12	66212318	0.0177632	21907	0.140291	Ultradistal forearm bone mineral density || id:ebi-a-GCST90013422	Ultradistal forearm bone mineral density	Ultradistal forearm bone mineral density || ||	TRUE	igd	0.0118	62892	9.1791e-17	66212318	12	ebi-a-GCST006867	Type 2 diabetes || id:ebi-a-GCST006867	TRUE
rs2294120	G	A	G	A	-0.0443	-0.00752923	0.455879	0.44845	FALSE	FALSE	FALSE	ebi-a-GCST90013422	8	146003567	0.0109288	21907	0.490865	Ultradistal forearm bone mineral density || id:ebi-a-GCST90013422	Ultradistal forearm bone mineral density	Ultradistal forearm bone mineral density || ||	TRUE	igd	0.0079	62892	1.61801e-08	146003567	8	ebi-a-GCST006867	Type 2 diabetes || id:ebi-a-GCST006867	TRUE
rs2296173	G	A	G	A	0.065	-0.00785884	0.212011	0.193411	FALSE	FALSE	FALSE	ebi-a-GCST90013422	1	39913351	0.0133993	21907	0.557532	Ultradistal forearm bone mineral density || id:ebi-a-GCST90013422	Ultradistal forearm bone mineral density	Ultradistal forearm bone mineral density || ||	TRUE	igd	0.0087	62892	7.65773e-14	39913351	1	ebi-a-GCST006867	Type 2 diabetes || id:ebi-a-GCST006867	TRUE
rs2299383	T	C	T	C	0.0412	-0.0147931	0.423455	0.436161	FALSE	FALSE	FALSE	ebi-a-GCST90013422	7	103418846	0.0107442	21907	0.168562	Ultradistal forearm bone mineral density || id:ebi-a-GCST90013422	Ultradistal forearm bone mineral density	Ultradistal forearm bone mineral density || ||	TRUE	igd	0.0073	62892	1.49001e-08	103418846	7	ebi-a-GCST006867	Type 2 diabetes || id:ebi-a-GCST006867	TRUE
rs243019	C	T	C	T	0.0566	0.00231845	0.455831	0.447019	FALSE	FALSE	FALSE	ebi-a-GCST90013422	2	60585806	0.0107252	21907	0.828857	Ultradistal forearm bone mineral density || id:ebi-a-GCST90013422	Ultradistal forearm bone mineral density	Ultradistal forearm bone mineral density || ||	TRUE	igd	0.0071	62892	2.28981e-15	60585806	2	ebi-a-GCST006867	Type 2 diabetes || id:ebi-a-GCST006867	TRUE
rs2493394	G	A	G	A	0.073	0.0033622	0.107338	0.119863	FALSE	FALSE	FALSE	ebi-a-GCST90013422	1	120471224	0.0164466	21907	0.838017	Ultradistal forearm bone mineral density || id:ebi-a-GCST90013422	Ultradistal forearm bone mineral density	Ultradistal forearm bone mineral density || ||	TRUE	igd	0.0113	62892	1.15101e-10	120471224	1	ebi-a-GCST006867	Type 2 diabetes || id:ebi-a-GCST006867	TRUE
rs2796441	A	G	A	G	-0.0715	-0.0150707	0.416458	0.413604	FALSE	FALSE	FALSE	ebi-a-GCST90013422	9	84308948	0.0108507	21907	0.164857	Ultradistal forearm bone mineral density || id:ebi-a-GCST90013422	Ultradistal forearm bone mineral density	Ultradistal forearm bone mineral density || ||	TRUE	igd	0.0073	62892	1.962e-22	84308948	9	ebi-a-GCST006867	Type 2 diabetes || id:ebi-a-GCST006867	TRUE
rs2820426	G	A	G	A	0.0521	0.00977369	0.610058	0.57775	FALSE	FALSE	FALSE	ebi-a-GCST90013422	1	219660535	0.0108176	21907	0.366261	Ultradistal forearm bone mineral density || id:ebi-a-GCST90013422	Ultradistal forearm bone mineral density	Ultradistal forearm bone mineral density || ||	TRUE	igd	0.0073	62892	1.30197e-12	219660535	1	ebi-a-GCST006867	Type 2 diabetes || id:ebi-a-GCST006867	TRUE
rs2867125	C	T	C	T	0.0601	0.0111516	0.827825	0.836233	FALSE	FALSE	FALSE	ebi-a-GCST90013422	2	622827	0.0143348	21907	0.436606	Ultradistal forearm bone mineral density || id:ebi-a-GCST90013422	Ultradistal forearm bone mineral density	Ultradistal forearm bone mineral density || ||	TRUE	igd	0.0096	62892	4.32504e-10	622827	2	ebi-a-GCST006867	Type 2 diabetes || id:ebi-a-GCST006867	TRUE
rs2908282	A	G	A	G	0.0552	-0.0155818	0.177395	0.156562	FALSE	FALSE	FALSE	ebi-a-GCST90013422	7	44248828	0.0146787	21907	0.288454	Ultradistal forearm bone mineral density || id:ebi-a-GCST90013422	Ultradistal forearm bone mineral density	Ultradistal forearm bone mineral density || ||	TRUE	igd	0.0094	62892	4.25001e-09	44248828	7	ebi-a-GCST006867	Type 2 diabetes || id:ebi-a-GCST006867	TRUE
rs2925979	C	T	C	T	-0.0534	-0.00716755	0.70085	0.684243	FALSE	FALSE	FALSE	ebi-a-GCST90013422	16	81534790	0.011419	21907	0.530208	Ultradistal forearm bone mineral density || id:ebi-a-GCST90013422	Ultradistal forearm bone mineral density	Ultradistal forearm bone mineral density || ||	TRUE	igd	0.0078	62892	9.0615e-12	81534790	16	ebi-a-GCST006867	Type 2 diabetes || id:ebi-a-GCST006867	TRUE
rs2943656	G	A	G	A	0.0902	-0.00509028	0.635133	0.587025	FALSE	FALSE	FALSE	ebi-a-GCST90013422	2	227121918	0.0107794	21907	0.636766	Ultradistal forearm bone mineral density || id:ebi-a-GCST90013422	Ultradistal forearm bone mineral density	Ultradistal forearm bone mineral density || ||	TRUE	igd	0.0074	62892	6.6973e-34	227121918	2	ebi-a-GCST006867	Type 2 diabetes || id:ebi-a-GCST006867	TRUE
rs3217992	T	C	T	C	0.0527	-0.000683455	0.369901	0.335945	FALSE	FALSE	FALSE	ebi-a-GCST90013422	9	22003223	0.0112441	21907	0.951532	Ultradistal forearm bone mineral density || id:ebi-a-GCST90013422	Ultradistal forearm bone mineral density	Ultradistal forearm bone mineral density || ||	TRUE	igd	0.0073	62892	7.2277e-13	22003223	9	ebi-a-GCST006867	Type 2 diabetes || id:ebi-a-GCST006867	TRUE
rs340874	C	T	C	T	0.0626	0.0234194	0.563904	0.554225	FALSE	FALSE	FALSE	ebi-a-GCST90013422	1	214159256	0.0106373	21907	0.0276911	Ultradistal forearm bone mineral density || id:ebi-a-GCST90013422	Ultradistal forearm bone mineral density	Ultradistal forearm bone mineral density || ||	TRUE	igd	0.0073	62892	8.40621e-18	214159256	1	ebi-a-GCST006867	Type 2 diabetes || id:ebi-a-GCST006867	TRUE
rs348330	A	G	A	G	-0.0487	-0.0157356	0.633451	0.653244	FALSE	FALSE	FALSE	ebi-a-GCST90013422	1	229672955	0.0117255	21907	0.179599	Ultradistal forearm bone mineral density || id:ebi-a-GCST90013422	Ultradistal forearm bone mineral density	Ultradistal forearm bone mineral density || ||	TRUE	igd	0.0081	62892	1.86402e-09	229672955	1	ebi-a-GCST006867	Type 2 diabetes || id:ebi-a-GCST006867	TRUE
rs3756784	G	T	G	T	0.0505	0.0165683	0.185838	0.204993	FALSE	FALSE	FALSE	ebi-a-GCST90013422	6	131950233	0.0131273	21907	0.206901	Ultradistal forearm bone mineral density || id:ebi-a-GCST90013422	Ultradistal forearm bone mineral density	Ultradistal forearm bone mineral density || ||	TRUE	igd	0.0091	62892	2.58899e-08	131950233	6	ebi-a-GCST006867	Type 2 diabetes || id:ebi-a-GCST006867	TRUE
rs3802177	A	G	A	G	-0.1217	-0.00662916	0.311281	0.307166	FALSE	FALSE	FALSE	ebi-a-GCST90013422	8	118185025	0.011581	21907	0.56704	Ultradistal forearm bone mineral density || id:ebi-a-GCST90013422	Ultradistal forearm bone mineral density	Ultradistal forearm bone mineral density || ||	TRUE	igd	0.008	62892	2.32113e-52	118185025	8	ebi-a-GCST006867	Type 2 diabetes || id:ebi-a-GCST006867	TRUE
rs459193	G	A	G	A	0.0711	0.0109986	0.745338	0.732047	FALSE	FALSE	FALSE	ebi-a-GCST90013422	5	55806751	0.011893	21907	0.355075	Ultradistal forearm bone mineral density || id:ebi-a-GCST90013422	Ultradistal forearm bone mineral density	Ultradistal forearm bone mineral density || ||	TRUE	igd	0.0083	62892	8.80846e-18	55806751	5	ebi-a-GCST006867	Type 2 diabetes || id:ebi-a-GCST006867	TRUE
rs4622883	G	A	G	A	-0.0435	-0.0271201	0.508544	0.453545	FALSE	FALSE	FALSE	ebi-a-GCST90013422	3	152188290	0.0106914	21907	0.0111931	Ultradistal forearm bone mineral density || id:ebi-a-GCST90013422	Ultradistal forearm bone mineral density	Ultradistal forearm bone mineral density || ||	TRUE	igd	0.0078	62892	3.01599e-08	152188290	3	ebi-a-GCST006867	Type 2 diabetes || id:ebi-a-GCST006867	TRUE
rs4686471	C	T	C	T	0.0534	0.000625705	0.609775	0.61326	FALSE	FALSE	FALSE	ebi-a-GCST90013422	3	187740899	0.0109729	21907	0.954527	Ultradistal forearm bone mineral density || id:ebi-a-GCST90013422	Ultradistal forearm bone mineral density	Ultradistal forearm bone mineral density || ||	TRUE	igd	0.0081	62892	4.28154e-11	187740899	3	ebi-a-GCST006867	Type 2 diabetes || id:ebi-a-GCST006867	TRUE
rs4812829	A	G	A	G	0.0532	-0.0171543	0.160871	0.183075	FALSE	FALSE	FALSE	ebi-a-GCST90013422	20	42989267	0.0137166	21907	0.211071	Ultradistal forearm bone mineral density || id:ebi-a-GCST90013422	Ultradistal forearm bone mineral density	Ultradistal forearm bone mineral density || ||	TRUE	igd	0.0095	62892	2.44298e-08	42989267	20	ebi-a-GCST006867	Type 2 diabetes || id:ebi-a-GCST006867	TRUE
rs4823182	G	A	G	A	0.0482	-0.00222907	0.335748	0.357531	FALSE	FALSE	FALSE	ebi-a-GCST90013422	22	44377442	0.0110696	21907	0.84041	Ultradistal forearm bone mineral density || id:ebi-a-GCST90013422	Ultradistal forearm bone mineral density	Ultradistal forearm bone mineral density || ||	TRUE	igd	0.0077	62892	3.35799e-10	44377442	22	ebi-a-GCST006867	Type 2 diabetes || id:ebi-a-GCST006867	TRUE
rs4865796	A	G	A	G	0.053	-0.00645744	0.69309	0.678851	FALSE	FALSE	FALSE	ebi-a-GCST90013422	5	53272664	0.0114067	21907	0.571321	Ultradistal forearm bone mineral density || id:ebi-a-GCST90013422	Ultradistal forearm bone mineral density	Ultradistal forearm bone mineral density || ||	TRUE	igd	0.0078	62892	1.32892e-11	53272664	5	ebi-a-GCST006867	Type 2 diabetes || id:ebi-a-GCST006867	TRUE
rs516946	C	T	C	T	0.0824	0.00742359	0.760633	0.789047	FALSE	FALSE	FALSE	ebi-a-GCST90013422	8	41519248	0.0129388	21907	0.56614	Ultradistal forearm bone mineral density || id:ebi-a-GCST90013422	Ultradistal forearm bone mineral density	Ultradistal forearm bone mineral density || ||	TRUE	igd	0.0085	62892	3.15864e-22	41519248	8	ebi-a-GCST006867	Type 2 diabetes || id:ebi-a-GCST006867	TRUE
rs5215	T	C	T	C	-0.0678	-0.0135201	0.639941	0.579472	FALSE	FALSE	FALSE	ebi-a-GCST90013422	11	17408630	0.010798	21907	0.210536	Ultradistal forearm bone mineral density || id:ebi-a-GCST90013422	Ultradistal forearm bone mineral density	Ultradistal forearm bone mineral density || ||	TRUE	igd	0.0073	62892	2.08882e-20	17408630	11	ebi-a-GCST006867	Type 2 diabetes || id:ebi-a-GCST006867	TRUE
rs55966194	G	C	G	C	-0.0526	0.00401305	0.281312	0.251636	FALSE	TRUE	FALSE	ebi-a-GCST90013422	20	45599090	0.0123844	21907	0.745908	Ultradistal forearm bone mineral density || id:ebi-a-GCST90013422	Ultradistal forearm bone mineral density	Ultradistal forearm bone mineral density || ||	TRUE	igd	0.0088	62892	2.25398e-09	45599090	20	ebi-a-GCST006867	Type 2 diabetes || id:ebi-a-GCST006867	TRUE
rs576674	A	G	A	G	-0.0654	0.00894312	0.832515	0.860455	FALSE	FALSE	FALSE	ebi-a-GCST90013422	13	33554302	0.01533	21907	0.55964	Ultradistal forearm bone mineral density || id:ebi-a-GCST90013422	Ultradistal forearm bone mineral density	Ultradistal forearm bone mineral density || ||	TRUE	igd	0.0097	62892	1.79184e-11	33554302	13	ebi-a-GCST006867	Type 2 diabetes || id:ebi-a-GCST006867	TRUE
rs6059662	G	A	G	A	0.0446	0.0238513	0.663176	0.690684	FALSE	FALSE	FALSE	ebi-a-GCST90013422	20	32675727	0.0115444	21907	0.0388249	Ultradistal forearm bone mineral density || id:ebi-a-GCST90013422	Ultradistal forearm bone mineral density	Ultradistal forearm bone mineral density || ||	TRUE	igd	0.0079	62892	1.51199e-08	32675727	20	ebi-a-GCST006867	Type 2 diabetes || id:ebi-a-GCST006867	TRUE
rs61953351	T	G	T	G	-0.07	-0.00064226	0.249902	0.244161	FALSE	FALSE	FALSE	ebi-a-GCST90013422	12	121456616	0.0124206	21907	0.95876	Ultradistal forearm bone mineral density || id:ebi-a-GCST90013422	Ultradistal forearm bone mineral density	Ultradistal forearm bone mineral density || ||	TRUE	igd	0.0091	62892	1.97606e-14	121456616	12	ebi-a-GCST006867	Type 2 diabetes || id:ebi-a-GCST006867	TRUE
rs622217	C	T	C	T	-0.0485	-0.00989931	0.483932	0.481195	FALSE	FALSE	FALSE	ebi-a-GCST90013422	6	160766770	0.0106394	21907	0.352143	Ultradistal forearm bone mineral density || id:ebi-a-GCST90013422	Ultradistal forearm bone mineral density	Ultradistal forearm bone mineral density || ||	TRUE	igd	0.0077	62892	3.12903e-10	160766770	6	ebi-a-GCST006867	Type 2 diabetes || id:ebi-a-GCST006867	TRUE
rs6494307	G	C	G	C	-0.0443	-0.00497901	0.426225	0.46346	FALSE	TRUE	TRUE	ebi-a-GCST90013422	15	62394690	0.0107065	21907	0.641898	Ultradistal forearm bone mineral density || id:ebi-a-GCST90013422	Ultradistal forearm bone mineral density	Ultradistal forearm bone mineral density || ||	TRUE	igd	0.0078	62892	1.66802e-08	62394690	15	ebi-a-GCST006867	Type 2 diabetes || id:ebi-a-GCST006867	TRUE
rs6515236	C	A	C	A	-0.0504	0.0110466	0.24933	0.266966	FALSE	FALSE	FALSE	ebi-a-GCST90013422	20	22435749	0.0120118	21907	0.357759	Ultradistal forearm bone mineral density || id:ebi-a-GCST90013422	Ultradistal forearm bone mineral density	Ultradistal forearm bone mineral density || ||	TRUE	igd	0.0091	62892	3.34303e-08	22435749	20	ebi-a-GCST006867	Type 2 diabetes || id:ebi-a-GCST006867	TRUE
rs67232546	T	C	T	C	0.0596	0.00215325	0.209222	0.177102	FALSE	FALSE	FALSE	ebi-a-GCST90013422	11	128398938	0.0139203	21907	0.877071	Ultradistal forearm bone mineral density || id:ebi-a-GCST90013422	Ultradistal forearm bone mineral density	Ultradistal forearm bone mineral density || ||	TRUE	igd	0.0096	62892	4.66101e-10	128398938	11	ebi-a-GCST006867	Type 2 diabetes || id:ebi-a-GCST006867	TRUE
rs6767484	G	A	G	A	0.1209	0.0260711	0.312261	0.287874	FALSE	FALSE	FALSE	ebi-a-GCST90013422	3	185520578	0.0117443	21907	0.0264259	Ultradistal forearm bone mineral density || id:ebi-a-GCST90013422	Ultradistal forearm bone mineral density	Ultradistal forearm bone mineral density || ||	TRUE	igd	0.0076	62892	2.70085e-56	185520578	3	ebi-a-GCST006867	Type 2 diabetes || id:ebi-a-GCST006867	TRUE
rs6785040	C	T	C	T	-0.0633	-0.0142668	0.15066	0.152453	FALSE	FALSE	FALSE	ebi-a-GCST90013422	3	63897915	0.0147273	21907	0.33268	Ultradistal forearm bone mineral density || id:ebi-a-GCST90013422	Ultradistal forearm bone mineral density	Ultradistal forearm bone mineral density || ||	TRUE	igd	0.0111	62892	1.26401e-08	63897915	3	ebi-a-GCST006867	Type 2 diabetes || id:ebi-a-GCST006867	TRUE
rs6795735	T	C	T	C	-0.0558	-0.00812874	0.410912	0.389124	FALSE	FALSE	FALSE	ebi-a-GCST90013422	3	64705365	0.0109262	21907	0.456897	Ultradistal forearm bone mineral density || id:ebi-a-GCST90013422	Ultradistal forearm bone mineral density	Ultradistal forearm bone mineral density || ||	TRUE	igd	0.0073	62892	1.63005e-14	64705365	3	ebi-a-GCST006867	Type 2 diabetes || id:ebi-a-GCST006867	TRUE
rs6878122	A	G	A	G	-0.0564	0.00819165	0.681791	0.714963	FALSE	FALSE	FALSE	ebi-a-GCST90013422	5	76427311	0.0117774	21907	0.486718	Ultradistal forearm bone mineral density || id:ebi-a-GCST90013422	Ultradistal forearm bone mineral density	Ultradistal forearm bone mineral density || ||	TRUE	igd	0.0079	62892	1.18796e-12	76427311	5	ebi-a-GCST006867	Type 2 diabetes || id:ebi-a-GCST006867	TRUE
rs6960043	C	T	C	T	0.064	-0.025333	0.521837	0.501926	FALSE	FALSE	FALSE	ebi-a-GCST90013422	7	15052860	0.0106058	21907	0.0169134	Ultradistal forearm bone mineral density || id:ebi-a-GCST90013422	Ultradistal forearm bone mineral density	Ultradistal forearm bone mineral density || ||	TRUE	igd	0.0071	62892	3.61077e-19	15052860	7	ebi-a-GCST006867	Type 2 diabetes || id:ebi-a-GCST006867	TRUE
rs7144011	T	G	T	G	0.0482	0.0209439	0.221063	0.18751	FALSE	FALSE	FALSE	ebi-a-GCST90013422	14	79940383	0.0135451	21907	0.122048	Ultradistal forearm bone mineral density || id:ebi-a-GCST90013422	Ultradistal forearm bone mineral density	Ultradistal forearm bone mineral density || ||	TRUE	igd	0.0085	62892	1.63599e-08	79940383	14	ebi-a-GCST006867	Type 2 diabetes || id:ebi-a-GCST006867	TRUE
rs7177055	A	G	A	G	0.0647	-0.00678315	0.718289	0.70954	FALSE	FALSE	FALSE	ebi-a-GCST90013422	15	77832762	0.0116732	21907	0.561181	Ultradistal forearm bone mineral density || id:ebi-a-GCST90013422	Ultradistal forearm bone mineral density	Ultradistal forearm bone mineral density || ||	TRUE	igd	0.0079	62892	2.746e-16	77832762	15	ebi-a-GCST006867	Type 2 diabetes || id:ebi-a-GCST006867	TRUE
rs7240767	C	T	C	T	0.0451	0.00928411	0.383677	0.387983	FALSE	FALSE	FALSE	ebi-a-GCST90013422	18	7070642	0.0109877	21907	0.398136	Ultradistal forearm bone mineral density || id:ebi-a-GCST90013422	Ultradistal forearm bone mineral density	Ultradistal forearm bone mineral density || ||	TRUE	igd	0.0081	62892	2.157e-08	7070642	18	ebi-a-GCST006867	Type 2 diabetes || id:ebi-a-GCST006867	TRUE
rs72802358	C	G	C	G	-0.1168	-0.00682698	0.101594	0.0910251	FALSE	TRUE	FALSE	ebi-a-GCST90013422	16	75243657	0.0186165	21907	0.71383	Ultradistal forearm bone mineral density || id:ebi-a-GCST90013422	Ultradistal forearm bone mineral density	Ultradistal forearm bone mineral density || ||	TRUE	igd	0.0133	62892	1.97015e-18	75243657	16	ebi-a-GCST006867	Type 2 diabetes || id:ebi-a-GCST006867	TRUE
rs72892910	T	G	T	G	0.0648	0.00676244	0.172394	0.171796	FALSE	FALSE	FALSE	ebi-a-GCST90013422	6	50816887	0.0141233	21907	0.632071	Ultradistal forearm bone mineral density || id:ebi-a-GCST90013422	Ultradistal forearm bone mineral density	Ultradistal forearm bone mineral density || ||	TRUE	igd	0.0099	62892	6.42836e-11	50816887	6	ebi-a-GCST006867	Type 2 diabetes || id:ebi-a-GCST006867	TRUE
rs735949	C	T	C	T	-0.0711	-0.0145475	0.14115	0.145121	FALSE	FALSE	FALSE	ebi-a-GCST90013422	4	185716232	0.0150484	21907	0.33369	Ultradistal forearm bone mineral density || id:ebi-a-GCST90013422	Ultradistal forearm bone mineral density	Ultradistal forearm bone mineral density || ||	TRUE	igd	0.0106	62892	1.94581e-11	185716232	4	ebi-a-GCST006867	Type 2 diabetes || id:ebi-a-GCST006867	TRUE
rs753270	C	T	C	T	0.0528	0.0182581	0.583535	0.593495	FALSE	FALSE	FALSE	ebi-a-GCST90013422	10	80964975	0.0108739	21907	0.0931365	Ultradistal forearm bone mineral density || id:ebi-a-GCST90013422	Ultradistal forearm bone mineral density	Ultradistal forearm bone mineral density || ||	TRUE	igd	0.0079	62892	2.70209e-11	80964975	10	ebi-a-GCST006867	Type 2 diabetes || id:ebi-a-GCST006867	TRUE
rs7561798	G	A	G	A	0.04	-0.00410925	0.482171	0.501955	FALSE	FALSE	FALSE	ebi-a-GCST90013422	2	228973660	0.0106598	21907	0.699873	Ultradistal forearm bone mineral density || id:ebi-a-GCST90013422	Ultradistal forearm bone mineral density	Ultradistal forearm bone mineral density || ||	TRUE	igd	0.0072	62892	2.79402e-08	228973660	2	ebi-a-GCST006867	Type 2 diabetes || id:ebi-a-GCST006867	TRUE
rs7572970	G	A	G	A	0.059	-0.0267487	0.722047	0.738164	FALSE	FALSE	FALSE	ebi-a-GCST90013422	2	161136656	0.0121414	21907	0.0275874	Ultradistal forearm bone mineral density || id:ebi-a-GCST90013422	Ultradistal forearm bone mineral density	Ultradistal forearm bone mineral density || ||	TRUE	igd	0.0087	62892	1.39091e-11	161136656	2	ebi-a-GCST006867	Type 2 diabetes || id:ebi-a-GCST006867	TRUE
rs7607777	T	G	T	G	-0.137	0.0316345	0.105906	0.078227	FALSE	FALSE	FALSE	ebi-a-GCST90013422	2	43629931	0.019726	21907	0.108782	Ultradistal forearm bone mineral density || id:ebi-a-GCST90013422	Ultradistal forearm bone mineral density	Ultradistal forearm bone mineral density || ||	TRUE	igd	0.0125	62892	9.39723e-28	43629931	2	ebi-a-GCST006867	Type 2 diabetes || id:ebi-a-GCST006867	TRUE
rs7674212	T	G	T	G	-0.0465	-0.0137836	0.408864	0.416941	FALSE	FALSE	FALSE	ebi-a-GCST90013422	4	103988899	0.0108197	21907	0.202688	Ultradistal forearm bone mineral density || id:ebi-a-GCST90013422	Ultradistal forearm bone mineral density	Ultradistal forearm bone mineral density || ||	TRUE	igd	0.0075	62892	6.18201e-10	103988899	4	ebi-a-GCST006867	Type 2 diabetes || id:ebi-a-GCST006867	TRUE
rs7685296	T	C	T	C	-0.0511	0.0133938	0.279365	0.265344	FALSE	FALSE	FALSE	ebi-a-GCST90013422	4	153254121	0.0124846	21907	0.283349	Ultradistal forearm bone mineral density || id:ebi-a-GCST90013422	Ultradistal forearm bone mineral density	Ultradistal forearm bone mineral density || ||	TRUE	igd	0.0081	62892	2.31702e-10	153254121	4	ebi-a-GCST006867	Type 2 diabetes || id:ebi-a-GCST006867	TRUE
rs7729395	T	C	T	C	0.1373	-0.00993186	0.0509409	0.0405465	FALSE	FALSE	FALSE	ebi-a-GCST90013422	5	102100576	0.0277889	21907	0.72079	Ultradistal forearm bone mineral density || id:ebi-a-GCST90013422	Ultradistal forearm bone mineral density	Ultradistal forearm bone mineral density || ||	TRUE	igd	0.016	62892	1.10103e-17	102100576	5	ebi-a-GCST006867	Type 2 diabetes || id:ebi-a-GCST006867	TRUE
rs7756992	G	A	G	A	0.1297	0.000969965	0.266896	0.268105	FALSE	FALSE	FALSE	ebi-a-GCST90013422	6	20679709	0.0119459	21907	0.935286	Ultradistal forearm bone mineral density || id:ebi-a-GCST90013422	Ultradistal forearm bone mineral density	Ultradistal forearm bone mineral density || ||	TRUE	igd	0.0078	62892	5.99929e-62	20679709	6	ebi-a-GCST006867	Type 2 diabetes || id:ebi-a-GCST006867	TRUE
rs7786095	G	A	G	A	-0.0743	-0.00667771	0.10386	0.0836356	FALSE	FALSE	FALSE	ebi-a-GCST90013422	7	156983847	0.0192887	21907	0.729194	Ultradistal forearm bone mineral density || id:ebi-a-GCST90013422	Ultradistal forearm bone mineral density	Ultradistal forearm bone mineral density || ||	TRUE	igd	0.0129	62892	9.64295e-09	156983847	7	ebi-a-GCST006867	Type 2 diabetes || id:ebi-a-GCST006867	TRUE
rs780094	C	T	C	T	0.0692	0.0180488	0.612845	0.689444	FALSE	FALSE	FALSE	ebi-a-GCST90013422	2	27741237	0.0114913	21907	0.116265	Ultradistal forearm bone mineral density || id:ebi-a-GCST90013422	Ultradistal forearm bone mineral density	Ultradistal forearm bone mineral density || ||	TRUE	igd	0.0074	62892	5.15941e-21	27741237	2	ebi-a-GCST006867	Type 2 diabetes || id:ebi-a-GCST006867	TRUE
rs7845219	C	T	C	T	-0.0422	0.0145903	0.492786	0.445299	FALSE	FALSE	FALSE	ebi-a-GCST90013422	8	95937502	0.0107639	21907	0.175263	Ultradistal forearm bone mineral density || id:ebi-a-GCST90013422	Ultradistal forearm bone mineral density	Ultradistal forearm bone mineral density || ||	TRUE	igd	0.0072	62892	4.54496e-09	95937502	8	ebi-a-GCST006867	Type 2 diabetes || id:ebi-a-GCST006867	TRUE
rs7903146	T	C	T	C	0.3059	0.0186208	0.291585	0.256548	FALSE	FALSE	FALSE	ebi-a-GCST90013422	10	114758349	0.0121689	21907	0.125969	Ultradistal forearm bone mineral density || id:ebi-a-GCST90013422	Ultradistal forearm bone mineral density	Ultradistal forearm bone mineral density || ||	TRUE	igd	0.0077	62892	1e-200	114758349	10	ebi-a-GCST006867	Type 2 diabetes || id:ebi-a-GCST006867	TRUE
rs7929543	C	A	C	A	0.0828	-0.0175962	0.0831599	0.0955876	FALSE	FALSE	FALSE	ebi-a-GCST90013422	11	49351026	0.0186678	21907	0.345888	Ultradistal forearm bone mineral density || id:ebi-a-GCST90013422	Ultradistal forearm bone mineral density	Ultradistal forearm bone mineral density || ||	TRUE	igd	0.0138	62892	2.19902e-09	49351026	11	ebi-a-GCST006867	Type 2 diabetes || id:ebi-a-GCST006867	TRUE
rs7955901	T	C	T	C	-0.0444	-0.0124805	0.556668	0.583459	FALSE	FALSE	FALSE	ebi-a-GCST90013422	12	71433293	0.0108637	21907	0.250629	Ultradistal forearm bone mineral density || id:ebi-a-GCST90013422	Ultradistal forearm bone mineral density	Ultradistal forearm bone mineral density || ||	TRUE	igd	0.0072	62892	7.16094e-10	71433293	12	ebi-a-GCST006867	Type 2 diabetes || id:ebi-a-GCST006867	TRUE
rs8068804	A	G	A	G	0.0587	0.0117199	0.325097	0.296967	FALSE	FALSE	FALSE	ebi-a-GCST90013422	17	3985864	0.0116925	21907	0.316178	Ultradistal forearm bone mineral density || id:ebi-a-GCST90013422	Ultradistal forearm bone mineral density	Ultradistal forearm bone mineral density || ||	TRUE	igd	0.0078	62892	4.41062e-14	3985864	17	ebi-a-GCST006867	Type 2 diabetes || id:ebi-a-GCST006867	TRUE
rs8108269	G	T	G	T	0.0644	-0.00974503	0.281015	0.297922	FALSE	FALSE	FALSE	ebi-a-GCST90013422	19	46158513	0.01165	21907	0.402884	Ultradistal forearm bone mineral density || id:ebi-a-GCST90013422	Ultradistal forearm bone mineral density	Ultradistal forearm bone mineral density || ||	TRUE	igd	0.0079	62892	3.11387e-16	46158513	19	ebi-a-GCST006867	Type 2 diabetes || id:ebi-a-GCST006867	TRUE
rs825476	T	C	T	C	0.0524	-0.00807014	0.580549	0.613554	FALSE	FALSE	FALSE	ebi-a-GCST90013422	12	124568456	0.0109627	21907	0.461641	Ultradistal forearm bone mineral density || id:ebi-a-GCST90013422	Ultradistal forearm bone mineral density	Ultradistal forearm bone mineral density || ||	TRUE	igd	0.0073	62892	6.80456e-13	124568456	12	ebi-a-GCST006867	Type 2 diabetes || id:ebi-a-GCST006867	TRUE
rs840967	A	C	A	C	-0.0497	-0.00444568	0.605922	0.558918	FALSE	FALSE	FALSE	ebi-a-GCST90013422	2	65701757	0.0106789	21907	0.677188	Ultradistal forearm bone mineral density || id:ebi-a-GCST90013422	Ultradistal forearm bone mineral density	Ultradistal forearm bone mineral density || ||	TRUE	igd	0.008	62892	5.44202e-10	65701757	2	ebi-a-GCST006867	Type 2 diabetes || id:ebi-a-GCST006867	TRUE
rs849135	A	G	A	G	-0.0999	-0.0258225	0.499052	0.450724	FALSE	FALSE	FALSE	ebi-a-GCST90013422	7	28196413	0.0107478	21907	0.0162798	Ultradistal forearm bone mineral density || id:ebi-a-GCST90013422	Ultradistal forearm bone mineral density	Ultradistal forearm bone mineral density || ||	TRUE	igd	0.0072	62892	1.04112e-43	28196413	7	ebi-a-GCST006867	Type 2 diabetes || id:ebi-a-GCST006867	TRUE
rs853974	C	T	C	T	-0.0601	-0.0393616	0.737586	0.723395	FALSE	FALSE	FALSE	ebi-a-GCST90013422	6	127068983	0.0119284	21907	0.000967453	Ultradistal forearm bone mineral density || id:ebi-a-GCST90013422	Ultradistal forearm bone mineral density	Ultradistal forearm bone mineral density || ||	TRUE	igd	0.0088	62892	7.85778e-12	127068983	6	ebi-a-GCST006867	Type 2 diabetes || id:ebi-a-GCST006867	TRUE
rs9369425	A	G	A	G	-0.0546	-0.0045437	0.708185	0.699544	FALSE	FALSE	FALSE	ebi-a-GCST90013422	6	43810974	0.011615	21907	0.695657	Ultradistal forearm bone mineral density || id:ebi-a-GCST90013422	Ultradistal forearm bone mineral density	Ultradistal forearm bone mineral density || ||	TRUE	igd	0.0085	62892	1.12899e-10	43810974	6	ebi-a-GCST006867	Type 2 diabetes || id:ebi-a-GCST006867	TRUE
rs963740	T	A	T	A	-0.0479	0.0126195	0.294299	0.246307	FALSE	TRUE	FALSE	ebi-a-GCST90013422	13	51096095	0.0124434	21907	0.31051	Ultradistal forearm bone mineral density || id:ebi-a-GCST90013422	Ultradistal forearm bone mineral density	Ultradistal forearm bone mineral density || ||	TRUE	igd	0.0086	62892	2.23198e-08	51096095	13	ebi-a-GCST006867	Type 2 diabetes || id:ebi-a-GCST006867	TRUE
rs9844972	C	G	C	G	0.0956	-0.0395607	0.0697229	0.0663264	FALSE	TRUE	FALSE	ebi-a-GCST90013422	3	150097635	0.021656	21907	0.0677345	Ultradistal forearm bone mineral density || id:ebi-a-GCST90013422	Ultradistal forearm bone mineral density	Ultradistal forearm bone mineral density || ||	TRUE	igd	0.0148	62892	1.02601e-10	150097635	3	ebi-a-GCST006867	Type 2 diabetes || id:ebi-a-GCST006867	TRUE
rs9894220	G	A	G	A	-0.0585	-0.0013718	0.43374	0.421923	FALSE	FALSE	FALSE	ebi-a-GCST90013422	17	46989154	0.0107441	21907	0.898403	Ultradistal forearm bone mineral density || id:ebi-a-GCST90013422	Ultradistal forearm bone mineral density	Ultradistal forearm bone mineral density || ||	TRUE	igd	0.0079	62892	1.51705e-13	46989154	17	ebi-a-GCST006867	Type 2 diabetes || id:ebi-a-GCST006867	TRUE
rs9928094	G	A	G	A	0.1045	0.0287768	0.42602	0.450144	FALSE	FALSE	FALSE	ebi-a-GCST90013422	16	53799905	0.0106323	21907	0.00679876	Ultradistal forearm bone mineral density || id:ebi-a-GCST90013422	Ultradistal forearm bone mineral density	Ultradistal forearm bone mineral density || ||	TRUE	igd	0.0072	62892	3.58922e-47	53799905	16	ebi-a-GCST006867	Type 2 diabetes || id:ebi-a-GCST006867	TRUE
rs993380	G	A	G	A	-0.0507	-0.00167307	0.66555	0.666882	FALSE	FALSE	FALSE	ebi-a-GCST90013422	4	83584496	0.0112255	21907	0.881521	Ultradistal forearm bone mineral density || id:ebi-a-GCST90013422	Ultradistal forearm bone mineral density	Ultradistal forearm bone mineral density || ||	TRUE	igd	0.0081	62892	4.58701e-10	83584496	4	ebi-a-GCST006867	Type 2 diabetes || id:ebi-a-GCST006867	TRUE
rs9940149	A	G	A	G	-0.058	-0.00587621	0.178556	0.159186	FALSE	FALSE	FALSE	ebi-a-GCST90013422	16	300641	0.0145697	21907	0.686714	Ultradistal forearm bone mineral density || id:ebi-a-GCST90013422	Ultradistal forearm bone mineral density	Ultradistal forearm bone mineral density || ||	TRUE	igd	0.0095	62892	9.29095e-10	300641	16	ebi-a-GCST006867	Type 2 diabetes || id:ebi-a-GCST006867	TRUE

## Sheet: S4
Table S4. Mendelian randomization (MR) analysis of DM2 and H-BMD
SNP	effect_allele.exposure	other_allele.exposure	effect_allele.outcome	other_allele.outcome	beta.exposure	beta.outcome	eaf.exposure	eaf.outcome	remove	palindromic	ambiguous	id.outcome	chr	pos	se.outcome	samplesize.outcome	pval.outcome	outcome	originalname.outcome	outcome.deprecated	mr_keep.outcome	data_source.outcome	se.exposure	samplesize.exposure	pval.exposure	pos.exposure	chr.exposure	id.exposure	exposure	mr_keep.exposure	pval_origin.exposure	data_source.exposure	action	mr_keep
rs10077431	A	C	A	C	-0.0487	-0.00389889	0.214668	0.220139	FALSE	FALSE	FALSE	ebi-a-GCST006979	5	112927686	0.00224108	426824	0.0990011	Heel bone mineral density || id:ebi-a-GCST006979	Heel bone mineral density	Heel bone mineral density || ||	TRUE	igd	0.0089	62892	4.75499e-08	112927686	5	ebi-a-GCST006867	Type 2 diabetes || id:ebi-a-GCST006867	TRUE	reported	igd	1	TRUE
rs10087241	A	G	A	G	-0.0475	0.00345434	0.594893	0.594787	FALSE	FALSE	FALSE	ebi-a-GCST006979	8	30863722	0.00189038	426824	0.0269998	Heel bone mineral density || id:ebi-a-GCST006979	Heel bone mineral density	Heel bone mineral density || ||	TRUE	igd	0.008	62892	2.79602e-09	30863722	8	ebi-a-GCST006867	Type 2 diabetes || id:ebi-a-GCST006867	TRUE	reported	igd	1	TRUE
rs10100265	C	A	C	A	-0.0491	-0.0310058	0.61049	0.613167	FALSE	FALSE	FALSE	ebi-a-GCST006979	8	10633159	0.00190421	426824	2.39994e-45	Heel bone mineral density || id:ebi-a-GCST006979	Heel bone mineral density	Heel bone mineral density || ||	TRUE	igd	0.0079	62892	6.28796e-10	10633159	8	ebi-a-GCST006867	Type 2 diabetes || id:ebi-a-GCST006867	TRUE	reported	igd	1	TRUE
rs10114341	C	T	C	T	-0.0409	-0.0139956	0.440754	0.438404	FALSE	FALSE	FALSE	ebi-a-GCST006979	9	96919182	0.00186847	426824	2.09991e-13	Heel bone mineral density || id:ebi-a-GCST006979	Heel bone mineral density	Heel bone mineral density || ||	TRUE	igd	0.0072	62892	1.15101e-08	96919182	9	ebi-a-GCST006867	Type 2 diabetes || id:ebi-a-GCST006867	TRUE	reported	igd	1	TRUE
rs10401969	C	T	C	T	0.0921	0.007947	0.0765858	0.076501	FALSE	FALSE	FALSE	ebi-a-GCST006979	19	19407718	0.00349768	426824	0.0560003	Heel bone mineral density || id:ebi-a-GCST006979	Heel bone mineral density	Heel bone mineral density || ||	TRUE	igd	0.0133	62892	4.13143e-12	19407718	19	ebi-a-GCST006867	Type 2 diabetes || id:ebi-a-GCST006867	TRUE	reported	igd	1	TRUE
rs1050226	G	A	G	A	-0.0491	0.00710256	0.406792	0.410394	FALSE	FALSE	FALSE	ebi-a-GCST006979	6	7281654	0.00185935	426824	0.00329997	Heel bone mineral density || id:ebi-a-GCST006979	Heel bone mineral density	Heel bone mineral density || ||	TRUE	igd	0.0074	62892	3.34195e-11	7281654	6	ebi-a-GCST006867	Type 2 diabetes || id:ebi-a-GCST006867	TRUE	reported	igd	1	TRUE
rs1061813	A	G	A	G	-0.0429	-0.00770514	0.537119	0.535037	FALSE	FALSE	FALSE	ebi-a-GCST006979	5	14847331	0.00185384	426824	0.000280001	Heel bone mineral density || id:ebi-a-GCST006979	Heel bone mineral density	Heel bone mineral density || ||	TRUE	igd	0.0073	62892	3.37202e-09	14847331	5	ebi-a-GCST006867	Type 2 diabetes || id:ebi-a-GCST006867	TRUE	reported	igd	1	TRUE
rs1063355	G	T	G	T	0.0709	-0.000853846	0.602436	0.609412	FALSE	FALSE	FALSE	ebi-a-GCST006979	6	32627714	0.00187784	426824	0.75	Heel bone mineral density || id:ebi-a-GCST006979	Heel bone mineral density	Heel bone mineral density || ||	TRUE	igd	0.0079	62892	3.71535e-19	32627714	6	ebi-a-GCST006867	Type 2 diabetes || id:ebi-a-GCST006867	TRUE	reported	igd	1	TRUE
rs10740322	A	G	A	G	0.0477	-0.00146289	0.687104	0.686551	FALSE	FALSE	FALSE	ebi-a-GCST006979	10	71485458	0.00199326	426824	0.27	Heel bone mineral density || id:ebi-a-GCST006979	Heel bone mineral density	Heel bone mineral density || ||	TRUE	igd	0.0085	62892	2.10902e-08	71485458	10	ebi-a-GCST006867	Type 2 diabetes || id:ebi-a-GCST006867	TRUE	reported	igd	1	TRUE
rs10811661	C	T	C	T	-0.1569	0.00402292	0.173605	0.173282	FALSE	FALSE	FALSE	ebi-a-GCST006979	9	22134094	0.00244521	426824	0.0619998	Heel bone mineral density || id:ebi-a-GCST006979	Heel bone mineral density	Heel bone mineral density || ||	TRUE	igd	0.0098	62892	4.13238e-58	22134094	9	ebi-a-GCST006867	Type 2 diabetes || id:ebi-a-GCST006867	TRUE	reported	igd	1	TRUE
rs10830963	G	C	G	C	0.0909	0.00857529	0.275768	0.275315	FALSE	TRUE	FALSE	ebi-a-GCST006979	11	92708710	0.00205701	426824	0.000269998	Heel bone mineral density || id:ebi-a-GCST006979	Heel bone mineral density	Heel bone mineral density || ||	TRUE	igd	0.008	62892	5.84655e-30	92708710	11	ebi-a-GCST006867	Type 2 diabetes || id:ebi-a-GCST006867	TRUE	reported	igd	1	TRUE
rs10842994	T	C	T	C	-0.0755	-0.00434175	0.197025	0.196767	FALSE	FALSE	FALSE	ebi-a-GCST006979	12	27965150	0.00231723	426824	0.0980009	Heel bone mineral density || id:ebi-a-GCST006979	Heel bone mineral density	Heel bone mineral density || ||	TRUE	igd	0.0091	62892	1.01508e-16	27965150	12	ebi-a-GCST006867	Type 2 diabetes || id:ebi-a-GCST006867	TRUE	reported	igd	1	TRUE
rs10974438	C	A	C	A	0.0591	-0.00193743	0.351215	0.349873	FALSE	FALSE	FALSE	ebi-a-GCST006979	9	4291928	0.00194271	426824	0.12	Heel bone mineral density || id:ebi-a-GCST006979	Heel bone mineral density	Heel bone mineral density || ||	TRUE	igd	0.0075	62892	3.01301e-15	4291928	9	ebi-a-GCST006867	Type 2 diabetes || id:ebi-a-GCST006867	TRUE	reported	igd	1	TRUE
rs11098676	C	T	C	T	0.054	0.0108594	0.787639	0.79228	FALSE	FALSE	FALSE	ebi-a-GCST006979	4	123833154	0.00227379	426824	1.89998e-05	Heel bone mineral density || id:ebi-a-GCST006979	Heel bone mineral density	Heel bone mineral density || ||	TRUE	igd	0.0096	62892	2.02698e-08	123833154	4	ebi-a-GCST006867	Type 2 diabetes || id:ebi-a-GCST006867	TRUE	reported	igd	1	TRUE
rs11107116	T	G	T	G	0.0467	0.0117794	0.219714	0.221992	FALSE	FALSE	FALSE	ebi-a-GCST006979	12	93978504	0.00222131	426824	2.59998e-06	Heel bone mineral density || id:ebi-a-GCST006979	Heel bone mineral density	Heel bone mineral density || ||	TRUE	igd	0.0085	62892	3.74999e-08	93978504	12	ebi-a-GCST006867	Type 2 diabetes || id:ebi-a-GCST006867	TRUE	reported	igd	1	TRUE
rs1111875	T	C	T	C	-0.0948	-0.00138578	0.408262	0.409194	FALSE	FALSE	FALSE	ebi-a-GCST006979	10	94462882	0.00187412	426824	0.780001	Heel bone mineral density || id:ebi-a-GCST006979	Heel bone mineral density	Heel bone mineral density || ||	TRUE	igd	0.0072	62892	3.61493e-39	94462882	10	ebi-a-GCST006867	Type 2 diabetes || id:ebi-a-GCST006867	TRUE	reported	igd	1	TRUE
rs11257655	T	C	T	C	0.0737	-0.00380192	0.206773	0.208204	FALSE	FALSE	FALSE	ebi-a-GCST006979	10	12307894	0.00226809	426824	0.0769999	Heel bone mineral density || id:ebi-a-GCST006979	Heel bone mineral density	Heel bone mineral density || ||	TRUE	igd	0.0087	62892	1.96607e-17	12307894	10	ebi-a-GCST006867	Type 2 diabetes || id:ebi-a-GCST006867	TRUE	reported	igd	1	TRUE
rs1127655	T	C	T	C	-0.0438	-0.00241521	0.529064	0.530431	FALSE	FALSE	FALSE	ebi-a-GCST006979	1	117530507	0.00183478	426824	0.2	Heel bone mineral density || id:ebi-a-GCST006979	Heel bone mineral density	Heel bone mineral density || ||	TRUE	igd	0.0079	62892	2.47098e-08	117530507	1	ebi-a-GCST006867	Type 2 diabetes || id:ebi-a-GCST006867	TRUE	reported	igd	1	TRUE
rs11708067	G	A	G	A	-0.0965	-0.0129947	0.23899	0.244929	FALSE	FALSE	FALSE	ebi-a-GCST006979	3	123065778	0.00214649	426824	2.5e-07	Heel bone mineral density || id:ebi-a-GCST006979	Heel bone mineral density	Heel bone mineral density || ||	TRUE	igd	0.0086	62892	5.93335e-29	123065778	3	ebi-a-GCST006867	Type 2 diabetes || id:ebi-a-GCST006867	TRUE	reported	igd	1	TRUE
rs11925227	A	G	A	G	-0.0534	-0.00103358	0.183439	0.187983	FALSE	FALSE	FALSE	ebi-a-GCST006979	3	170766618	0.00238189	426824	0.91	Heel bone mineral density || id:ebi-a-GCST006979	Heel bone mineral density	Heel bone mineral density || ||	TRUE	igd	0.0095	62892	2.24999e-08	170766618	3	ebi-a-GCST006867	Type 2 diabetes || id:ebi-a-GCST006867	TRUE	reported	igd	1	TRUE
rs11926707	C	T	C	T	0.0463	0.00689018	0.625556	0.621834	FALSE	FALSE	FALSE	ebi-a-GCST006979	3	46925539	0.00196107	426824	0.000109999	Heel bone mineral density || id:ebi-a-GCST006979	Heel bone mineral density	Heel bone mineral density || ||	TRUE	igd	0.0082	62892	1.68601e-08	46925539	3	ebi-a-GCST006867	Type 2 diabetes || id:ebi-a-GCST006867	TRUE	reported	igd	1	TRUE
rs12088739	G	A	G	A	-0.0884	-0.0173534	0.0898481	0.090259	FALSE	FALSE	FALSE	ebi-a-GCST006979	1	51506886	0.00319437	426824	1.2e-05	Heel bone mineral density || id:ebi-a-GCST006979	Heel bone mineral density	Heel bone mineral density || ||	TRUE	igd	0.013	62892	9.79264e-12	51506886	1	ebi-a-GCST006867	Type 2 diabetes || id:ebi-a-GCST006867	TRUE	reported	igd	1	TRUE
rs12299509	G	A	G	A	0.0467	0.00657337	0.478622	0.469605	FALSE	FALSE	FALSE	ebi-a-GCST006979	12	4406281	0.00184938	426824	0.00189998	Heel bone mineral density || id:ebi-a-GCST006979	Heel bone mineral density	Heel bone mineral density || ||	TRUE	igd	0.0073	62892	2.08699e-10	4406281	12	ebi-a-GCST006867	Type 2 diabetes || id:ebi-a-GCST006867	TRUE	reported	igd	1	TRUE
rs12617659	T	C	T	C	-0.0685	0.000170508	0.147238	0.148883	FALSE	FALSE	FALSE	ebi-a-GCST006979	2	121309759	0.00257423	426824	0.87	Heel bone mineral density || id:ebi-a-GCST006979	Heel bone mineral density	Heel bone mineral density || ||	TRUE	igd	0.0103	62892	2.82683e-11	121309759	2	ebi-a-GCST006867	Type 2 diabetes || id:ebi-a-GCST006867	TRUE	reported	igd	1	TRUE
rs12910825	G	A	G	A	0.0517	0.00344695	0.360391	0.357202	FALSE	FALSE	FALSE	ebi-a-GCST006979	15	91511260	0.00193714	426824	0.19	Heel bone mineral density || id:ebi-a-GCST006979	Heel bone mineral density	Heel bone mineral density || ||	TRUE	igd	0.0074	62892	2.16421e-12	91511260	15	ebi-a-GCST006867	Type 2 diabetes || id:ebi-a-GCST006867	TRUE	reported	igd	1	TRUE
rs12945601	C	T	C	T	-0.048	0.00770184	0.613603	0.61991	FALSE	FALSE	FALSE	ebi-a-GCST006979	17	17653411	0.0019118	426824	0.00064	Heel bone mineral density || id:ebi-a-GCST006979	Heel bone mineral density	Heel bone mineral density || ||	TRUE	igd	0.008	62892	1.71799e-09	17653411	17	ebi-a-GCST006867	Type 2 diabetes || id:ebi-a-GCST006867	TRUE	reported	igd	1	TRUE
rs12970134	A	G	A	G	0.0555	0.016344	0.26512	0.266424	FALSE	FALSE	FALSE	ebi-a-GCST006979	18	57884750	0.00209994	426824	9.59997e-10	Heel bone mineral density || id:ebi-a-GCST006979	Heel bone mineral density	Heel bone mineral density || ||	TRUE	igd	0.008	62892	5.30884e-12	57884750	18	ebi-a-GCST006867	Type 2 diabetes || id:ebi-a-GCST006867	TRUE	reported	igd	1	TRUE
rs13234269	A	T	A	T	-0.0583	0.00464258	0.492515	0.496215	FALSE	TRUE	TRUE	ebi-a-GCST006979	7	130429186	0.0018303	426824	0.00809991	Heel bone mineral density || id:ebi-a-GCST006979	Heel bone mineral density	Heel bone mineral density || ||	TRUE	igd	0.0078	62892	6.9775e-14	130429186	7	ebi-a-GCST006867	Type 2 diabetes || id:ebi-a-GCST006867	TRUE	reported	igd	1	TRUE
rs13239186	T	C	T	C	0.0539	-0.00452545	0.302029	0.304113	FALSE	FALSE	FALSE	ebi-a-GCST006979	7	117510621	0.00200111	426824	0.0779992	Heel bone mineral density || id:ebi-a-GCST006979	Heel bone mineral density	Heel bone mineral density || ||	TRUE	igd	0.0085	62892	2.70402e-10	117510621	7	ebi-a-GCST006867	Type 2 diabetes || id:ebi-a-GCST006867	TRUE	reported	igd	1	TRUE
rs13330951	G	A	G	A	-0.0456	-0.000613524	0.488314	0.484435	FALSE	FALSE	FALSE	ebi-a-GCST006979	16	69563842	0.00188286	426824	0.85	Heel bone mineral density || id:ebi-a-GCST006979	Heel bone mineral density	Heel bone mineral density || ||	TRUE	igd	0.0081	62892	1.53801e-08	69563842	16	ebi-a-GCST006867	Type 2 diabetes || id:ebi-a-GCST006867	TRUE	reported	igd	1	TRUE
rs13389219	T	C	T	C	-0.0722	0.00254665	0.394368	0.392975	FALSE	FALSE	FALSE	ebi-a-GCST006979	2	165528876	0.00187174	426824	0.34	Heel bone mineral density || id:ebi-a-GCST006979	Heel bone mineral density	Heel bone mineral density || ||	TRUE	igd	0.0074	62892	2.1062e-22	165528876	2	ebi-a-GCST006867	Type 2 diabetes || id:ebi-a-GCST006867	TRUE	reported	igd	1	TRUE
rs1359790	A	G	A	G	-0.0796	-0.00927599	0.2867	0.288852	FALSE	FALSE	FALSE	ebi-a-GCST006979	13	80717156	0.00204642	426824	0.0002	Heel bone mineral density || id:ebi-a-GCST006979	Heel bone mineral density	Heel bone mineral density || ||	TRUE	igd	0.008	62892	2.79512e-23	80717156	13	ebi-a-GCST006867	Type 2 diabetes || id:ebi-a-GCST006867	TRUE	reported	igd	1	TRUE
rs1496653	G	A	G	A	-0.0769	-0.00267116	0.204782	0.204658	FALSE	FALSE	FALSE	ebi-a-GCST006979	3	23454790	0.00228649	426824	0.450001	Heel bone mineral density || id:ebi-a-GCST006979	Heel bone mineral density	Heel bone mineral density || ||	TRUE	igd	0.0088	62892	2.57217e-18	23454790	3	ebi-a-GCST006867	Type 2 diabetes || id:ebi-a-GCST006867	TRUE	reported	igd	1	TRUE
rs1552224	C	A	C	A	-0.1034	-0.00823004	0.15421	0.155291	FALSE	FALSE	FALSE	ebi-a-GCST006979	11	72433098	0.0025364	426824	0.0129999	Heel bone mineral density || id:ebi-a-GCST006979	Heel bone mineral density	Heel bone mineral density || ||	TRUE	igd	0.0101	62892	8.63575e-25	72433098	11	ebi-a-GCST006867	Type 2 diabetes || id:ebi-a-GCST006867	TRUE	reported	igd	1	TRUE
rs16988333	G	A	G	A	-0.0745	0.0194404	0.0904035	0.09321	FALSE	FALSE	FALSE	ebi-a-GCST006979	22	30552813	0.00320521	426824	2.30001e-08	Heel bone mineral density || id:ebi-a-GCST006979	Heel bone mineral density	Heel bone mineral density || ||	TRUE	igd	0.013	62892	9.16896e-09	30552813	22	ebi-a-GCST006867	Type 2 diabetes || id:ebi-a-GCST006867	TRUE	reported	igd	1	TRUE
rs17086692	T	G	T	G	-0.0467	-0.00222114	0.313426	0.310023	FALSE	FALSE	FALSE	ebi-a-GCST006979	4	53134293	0.00199752	426824	0.450001	Heel bone mineral density || id:ebi-a-GCST006979	Heel bone mineral density	Heel bone mineral density || ||	TRUE	igd	0.0084	62892	2.48102e-08	53134293	4	ebi-a-GCST006867	Type 2 diabetes || id:ebi-a-GCST006867	TRUE	reported	igd	1	TRUE
rs17168486	T	C	T	C	0.0742	-0.000864283	0.173603	0.173581	FALSE	FALSE	FALSE	ebi-a-GCST006979	7	14898282	0.00241715	426824	0.64	Heel bone mineral density || id:ebi-a-GCST006979	Heel bone mineral density	Heel bone mineral density || ||	TRUE	igd	0.0094	62892	2.17721e-15	14898282	7	ebi-a-GCST006867	Type 2 diabetes || id:ebi-a-GCST006867	TRUE	reported	igd	1	TRUE
rs17405722	A	G	A	G	0.087	-0.00177375	0.0741526	0.075399	FALSE	FALSE	FALSE	ebi-a-GCST006979	17	40542501	0.00350646	426824	0.68	Heel bone mineral density || id:ebi-a-GCST006979	Heel bone mineral density	Heel bone mineral density || ||	TRUE	igd	0.0146	62892	2.27798e-09	40542501	17	ebi-a-GCST006867	Type 2 diabetes || id:ebi-a-GCST006867	TRUE	reported	igd	1	TRUE
rs17411031	G	C	G	C	-0.045	-0.00294413	0.261729	0.261182	FALSE	TRUE	FALSE	ebi-a-GCST006979	8	19852310	0.00210782	426824	0.26	Heel bone mineral density || id:ebi-a-GCST006979	Heel bone mineral density	Heel bone mineral density || ||	TRUE	igd	0.0081	62892	3.03501e-08	19852310	8	ebi-a-GCST006867	Type 2 diabetes || id:ebi-a-GCST006867	TRUE	reported	igd	1	TRUE
rs1758632	G	C	G	C	0.0491	0.0126975	0.623407	0.622516	FALSE	TRUE	FALSE	ebi-a-GCST006979	9	34025640	0.00190816	426824	2.19999e-10	Heel bone mineral density || id:ebi-a-GCST006979	Heel bone mineral density	Heel bone mineral density || ||	TRUE	igd	0.0081	62892	1.36e-09	34025640	9	ebi-a-GCST006867	Type 2 diabetes || id:ebi-a-GCST006867	TRUE	reported	igd	1	TRUE
rs17631783	T	C	T	C	-0.0487	-0.00971607	0.26346	0.263144	FALSE	FALSE	FALSE	ebi-a-GCST006979	17	61687600	0.00210593	426824	4.70002e-06	Heel bone mineral density || id:ebi-a-GCST006979	Heel bone mineral density	Heel bone mineral density || ||	TRUE	igd	0.0089	62892	3.94903e-08	61687600	17	ebi-a-GCST006867	Type 2 diabetes || id:ebi-a-GCST006867	TRUE	reported	igd	1	TRUE
rs17791513	G	A	G	A	-0.1027	-0.0107875	0.0605985	0.061922	FALSE	FALSE	FALSE	ebi-a-GCST006979	9	81905590	0.00386361	426824	0.0230001	Heel bone mineral density || id:ebi-a-GCST006979	Heel bone mineral density	Heel bone mineral density || ||	TRUE	igd	0.0148	62892	4.61424e-12	81905590	9	ebi-a-GCST006867	Type 2 diabetes || id:ebi-a-GCST006867	TRUE	reported	igd	1	TRUE
rs1801214	T	C	T	C	0.0903	-0.000336093	0.599585	0.598091	FALSE	FALSE	FALSE	ebi-a-GCST006979	4	6303022	0.00188479	426824	0.81	Heel bone mineral density || id:ebi-a-GCST006979	Heel bone mineral density	Heel bone mineral density || ||	TRUE	igd	0.0074	62892	5.51569e-34	6303022	4	ebi-a-GCST006867	Type 2 diabetes || id:ebi-a-GCST006867	TRUE	reported	igd	1	TRUE
rs1899951	T	C	T	C	-0.1118	-0.00760358	0.123288	0.12227	FALSE	FALSE	FALSE	ebi-a-GCST006979	3	12394840	0.00281365	426824	0.00629999	Heel bone mineral density || id:ebi-a-GCST006979	Heel bone mineral density	Heel bone mineral density || ||	TRUE	igd	0.0109	62892	1.63682e-24	12394840	3	ebi-a-GCST006867	Type 2 diabetes || id:ebi-a-GCST006867	TRUE	reported	igd	1	TRUE
rs2058913	T	A	T	A	-0.0491	-0.0107713	0.565008	0.568384	FALSE	TRUE	TRUE	ebi-a-GCST006979	15	63831869	0.00187614	426824	3.59998e-07	Heel bone mineral density || id:ebi-a-GCST006979	Heel bone mineral density	Heel bone mineral density || ||	TRUE	igd	0.0078	62892	3.26099e-10	63831869	15	ebi-a-GCST006867	Type 2 diabetes || id:ebi-a-GCST006867	TRUE	reported	igd	1	TRUE
rs2237892	T	C	T	C	-0.096	0.00268508	0.0624896	0.064292	FALSE	FALSE	FALSE	ebi-a-GCST006979	11	2839751	0.00374838	426824	0.54	Heel bone mineral density || id:ebi-a-GCST006979	Heel bone mineral density	Heel bone mineral density || ||	TRUE	igd	0.0157	62892	8.74601e-10	2839751	11	ebi-a-GCST006867	Type 2 diabetes || id:ebi-a-GCST006867	TRUE	reported	igd	1	TRUE
rs2246618	T	C	T	C	0.0513	0.00163035	0.307253	0.306085	FALSE	FALSE	FALSE	ebi-a-GCST006979	6	31478986	0.00198234	426824	0.0549997	Heel bone mineral density || id:ebi-a-GCST006979	Heel bone mineral density	Heel bone mineral density || ||	TRUE	igd	0.0084	62892	1.20301e-09	31478986	6	ebi-a-GCST006867	Type 2 diabetes || id:ebi-a-GCST006867	TRUE	reported	igd	1	TRUE
rs2261181	T	C	T	C	0.0985	0.00270942	0.09647	0.095593	FALSE	FALSE	FALSE	ebi-a-GCST006979	12	66212318	0.00314866	426824	0.33	Heel bone mineral density || id:ebi-a-GCST006979	Heel bone mineral density	Heel bone mineral density || ||	TRUE	igd	0.0118	62892	9.1791e-17	66212318	12	ebi-a-GCST006867	Type 2 diabetes || id:ebi-a-GCST006867	TRUE	reported	igd	1	TRUE
rs2294120	G	A	G	A	-0.0443	-0.000484949	0.455879	0.455788	FALSE	FALSE	FALSE	ebi-a-GCST006979	8	146003567	0.00186127	426824	0.69	Heel bone mineral density || id:ebi-a-GCST006979	Heel bone mineral density	Heel bone mineral density || ||	TRUE	igd	0.0079	62892	1.61801e-08	146003567	8	ebi-a-GCST006867	Type 2 diabetes || id:ebi-a-GCST006867	TRUE	reported	igd	1	TRUE
rs2296173	G	A	G	A	0.065	0.0139128	0.212011	0.210964	FALSE	FALSE	FALSE	ebi-a-GCST006979	1	39913351	0.00224302	426824	8.70001e-06	Heel bone mineral density || id:ebi-a-GCST006979	Heel bone mineral density	Heel bone mineral density || ||	TRUE	igd	0.0087	62892	7.65773e-14	39913351	1	ebi-a-GCST006867	Type 2 diabetes || id:ebi-a-GCST006867	TRUE	reported	igd	1	TRUE
rs2299383	T	C	T	C	0.0412	0.00641798	0.423455	0.424525	FALSE	FALSE	FALSE	ebi-a-GCST006979	7	103418846	0.00185346	426824	4.30002e-05	Heel bone mineral density || id:ebi-a-GCST006979	Heel bone mineral density	Heel bone mineral density || ||	TRUE	igd	0.0073	62892	1.49001e-08	103418846	7	ebi-a-GCST006867	Type 2 diabetes || id:ebi-a-GCST006867	TRUE	reported	igd	1	TRUE
rs243019	C	T	C	T	0.0566	-0.00211184	0.455831	0.45466	FALSE	FALSE	FALSE	ebi-a-GCST006979	2	60585806	0.00184399	426824	0.56	Heel bone mineral density || id:ebi-a-GCST006979	Heel bone mineral density	Heel bone mineral density || ||	TRUE	igd	0.0071	62892	2.28981e-15	60585806	2	ebi-a-GCST006867	Type 2 diabetes || id:ebi-a-GCST006867	TRUE	reported	igd	1	TRUE
rs2493394	G	A	G	A	0.073	-0.00705513	0.107338	0.108881	FALSE	FALSE	FALSE	ebi-a-GCST006979	1	120471224	0.00293547	426824	0.0420001	Heel bone mineral density || id:ebi-a-GCST006979	Heel bone mineral density	Heel bone mineral density || ||	TRUE	igd	0.0113	62892	1.15101e-10	120471224	1	ebi-a-GCST006867	Type 2 diabetes || id:ebi-a-GCST006867	TRUE	reported	igd	1	TRUE
rs2796441	A	G	A	G	-0.0715	0.00253986	0.416458	0.419611	FALSE	FALSE	FALSE	ebi-a-GCST006979	9	84308948	0.0018728	426824	0.02	Heel bone mineral density || id:ebi-a-GCST006979	Heel bone mineral density	Heel bone mineral density || ||	TRUE	igd	0.0073	62892	1.962e-22	84308948	9	ebi-a-GCST006867	Type 2 diabetes || id:ebi-a-GCST006867	TRUE	reported	igd	1	TRUE
rs2820426	G	A	G	A	0.0521	0.00279331	0.610058	0.604368	FALSE	FALSE	FALSE	ebi-a-GCST006979	1	219660535	0.00187895	426824	0.33	Heel bone mineral density || id:ebi-a-GCST006979	Heel bone mineral density	Heel bone mineral density || ||	TRUE	igd	0.0073	62892	1.30197e-12	219660535	1	ebi-a-GCST006867	Type 2 diabetes || id:ebi-a-GCST006867	TRUE	reported	igd	1	TRUE
rs2867125	C	T	C	T	0.0601	0.0149949	0.827825	0.828067	FALSE	FALSE	FALSE	ebi-a-GCST006979	2	622827	0.00242179	426824	2.59998e-08	Heel bone mineral density || id:ebi-a-GCST006979	Heel bone mineral density	Heel bone mineral density || ||	TRUE	igd	0.0096	62892	4.32504e-10	622827	2	ebi-a-GCST006867	Type 2 diabetes || id:ebi-a-GCST006867	TRUE	reported	igd	1	TRUE
rs2908282	A	G	A	G	0.0552	-0.000839279	0.177395	0.178309	FALSE	FALSE	FALSE	ebi-a-GCST006979	7	44248828	0.00238356	426824	0.97	Heel bone mineral density || id:ebi-a-GCST006979	Heel bone mineral density	Heel bone mineral density || ||	TRUE	igd	0.0094	62892	4.25001e-09	44248828	7	ebi-a-GCST006867	Type 2 diabetes || id:ebi-a-GCST006867	TRUE	reported	igd	1	TRUE
rs2925979	C	T	C	T	-0.0534	0.00437937	0.70085	0.699396	FALSE	FALSE	FALSE	ebi-a-GCST006979	16	81534790	0.00201913	426824	0.0280001	Heel bone mineral density || id:ebi-a-GCST006979	Heel bone mineral density	Heel bone mineral density || ||	TRUE	igd	0.0078	62892	9.0615e-12	81534790	16	ebi-a-GCST006867	Type 2 diabetes || id:ebi-a-GCST006867	TRUE	reported	igd	1	TRUE
rs2943656	G	A	G	A	0.0902	0.00536145	0.635133	0.636687	FALSE	FALSE	FALSE	ebi-a-GCST006979	2	227121918	0.00190196	426824	0.0189998	Heel bone mineral density || id:ebi-a-GCST006979	Heel bone mineral density	Heel bone mineral density || ||	TRUE	igd	0.0074	62892	6.6973e-34	227121918	2	ebi-a-GCST006867	Type 2 diabetes || id:ebi-a-GCST006867	TRUE	reported	igd	1	TRUE
rs3217992	T	C	T	C	0.0527	0.00156198	0.369901	0.366004	FALSE	FALSE	FALSE	ebi-a-GCST006979	9	22003223	0.00192357	426824	0.18	Heel bone mineral density || id:ebi-a-GCST006979	Heel bone mineral density	Heel bone mineral density || ||	TRUE	igd	0.0073	62892	7.2277e-13	22003223	9	ebi-a-GCST006867	Type 2 diabetes || id:ebi-a-GCST006867	TRUE	reported	igd	1	TRUE
rs340874	C	T	C	T	0.0626	0.00415241	0.563904	0.570595	FALSE	FALSE	FALSE	ebi-a-GCST006979	1	214159256	0.00184679	426824	0.0879995	Heel bone mineral density || id:ebi-a-GCST006979	Heel bone mineral density	Heel bone mineral density || ||	TRUE	igd	0.0073	62892	8.40621e-18	214159256	1	ebi-a-GCST006867	Type 2 diabetes || id:ebi-a-GCST006867	TRUE	reported	igd	1	TRUE
rs348330	A	G	A	G	-0.0487	-0.00736078	0.633451	0.634195	FALSE	FALSE	FALSE	ebi-a-GCST006979	1	229672955	0.00190744	426824	1.29999e-05	Heel bone mineral density || id:ebi-a-GCST006979	Heel bone mineral density	Heel bone mineral density || ||	TRUE	igd	0.0081	62892	1.86402e-09	229672955	1	ebi-a-GCST006867	Type 2 diabetes || id:ebi-a-GCST006867	TRUE	reported	igd	1	TRUE
rs3756784	G	T	G	T	0.0505	0.00793758	0.185838	0.18783	FALSE	FALSE	FALSE	ebi-a-GCST006979	6	131950233	0.00234819	426824	9.59997e-05	Heel bone mineral density || id:ebi-a-GCST006979	Heel bone mineral density	Heel bone mineral density || ||	TRUE	igd	0.0091	62892	2.58899e-08	131950233	6	ebi-a-GCST006867	Type 2 diabetes || id:ebi-a-GCST006867	TRUE	reported	igd	1	TRUE
rs3802177	A	G	A	G	-0.1217	-0.00361279	0.311281	0.311074	FALSE	FALSE	FALSE	ebi-a-GCST006979	8	118185025	0.00200256	426824	0.27	Heel bone mineral density || id:ebi-a-GCST006979	Heel bone mineral density	Heel bone mineral density || ||	TRUE	igd	0.008	62892	2.32113e-52	118185025	8	ebi-a-GCST006867	Type 2 diabetes || id:ebi-a-GCST006867	TRUE	reported	igd	1	TRUE
rs459193	G	A	G	A	0.0711	-0.00761996	0.745338	0.746965	FALSE	FALSE	FALSE	ebi-a-GCST006979	5	55806751	0.0021199	426824	0.0008	Heel bone mineral density || id:ebi-a-GCST006979	Heel bone mineral density	Heel bone mineral density || ||	TRUE	igd	0.0083	62892	8.80846e-18	55806751	5	ebi-a-GCST006867	Type 2 diabetes || id:ebi-a-GCST006867	TRUE	reported	igd	1	TRUE
rs4622883	G	A	G	A	-0.0435	-0.00944642	0.508544	0.505315	FALSE	FALSE	FALSE	ebi-a-GCST006979	3	152188290	0.00184829	426824	2.80001e-06	Heel bone mineral density || id:ebi-a-GCST006979	Heel bone mineral density	Heel bone mineral density || ||	TRUE	igd	0.0078	62892	3.01599e-08	152188290	3	ebi-a-GCST006867	Type 2 diabetes || id:ebi-a-GCST006867	TRUE	reported	igd	1	TRUE
rs4686471	C	T	C	T	0.0534	-0.00197807	0.609775	0.609538	FALSE	FALSE	FALSE	ebi-a-GCST006979	3	187740899	0.00189998	426824	0.0860003	Heel bone mineral density || id:ebi-a-GCST006979	Heel bone mineral density	Heel bone mineral density || ||	TRUE	igd	0.0081	62892	4.28154e-11	187740899	3	ebi-a-GCST006867	Type 2 diabetes || id:ebi-a-GCST006867	TRUE	reported	igd	1	TRUE
rs4812829	A	G	A	G	0.0532	0.00630022	0.160871	0.158774	FALSE	FALSE	FALSE	ebi-a-GCST006979	20	42989267	0.00253959	426824	0.0309999	Heel bone mineral density || id:ebi-a-GCST006979	Heel bone mineral density	Heel bone mineral density || ||	TRUE	igd	0.0095	62892	2.44298e-08	42989267	20	ebi-a-GCST006867	Type 2 diabetes || id:ebi-a-GCST006867	TRUE	reported	igd	1	TRUE
rs4823182	G	A	G	A	0.0482	-0.000187512	0.335748	0.332731	FALSE	FALSE	FALSE	ebi-a-GCST006979	22	44377442	0.00197357	426824	0.69	Heel bone mineral density || id:ebi-a-GCST006979	Heel bone mineral density	Heel bone mineral density || ||	TRUE	igd	0.0077	62892	3.35799e-10	44377442	22	ebi-a-GCST006867	Type 2 diabetes || id:ebi-a-GCST006867	TRUE	reported	igd	1	TRUE
rs4865796	A	G	A	G	0.053	0.00569636	0.69309	0.692164	FALSE	FALSE	FALSE	ebi-a-GCST006979	5	53272664	0.00200023	426824	0.000389996	Heel bone mineral density || id:ebi-a-GCST006979	Heel bone mineral density	Heel bone mineral density || ||	TRUE	igd	0.0078	62892	1.32892e-11	53272664	5	ebi-a-GCST006867	Type 2 diabetes || id:ebi-a-GCST006867	TRUE	reported	igd	1	TRUE
rs516946	C	T	C	T	0.0824	0.000513125	0.760633	0.76298	FALSE	FALSE	FALSE	ebi-a-GCST006979	8	41519248	0.00217618	426824	0.37	Heel bone mineral density || id:ebi-a-GCST006979	Heel bone mineral density	Heel bone mineral density || ||	TRUE	igd	0.0085	62892	3.15864e-22	41519248	8	ebi-a-GCST006867	Type 2 diabetes || id:ebi-a-GCST006867	TRUE	reported	igd	1	TRUE
rs5215	T	C	T	C	-0.0678	-0.00141939	0.639941	0.642046	FALSE	FALSE	FALSE	ebi-a-GCST006979	11	17408630	0.0019191	426824	0.55	Heel bone mineral density || id:ebi-a-GCST006979	Heel bone mineral density	Heel bone mineral density || ||	TRUE	igd	0.0073	62892	2.08882e-20	17408630	11	ebi-a-GCST006867	Type 2 diabetes || id:ebi-a-GCST006867	TRUE	reported	igd	1	TRUE
rs55966194	G	C	G	C	-0.0526	0.0122753	0.281312	0.283633	FALSE	TRUE	FALSE	ebi-a-GCST006979	20	45599090	0.00205828	426824	9.90011e-08	Heel bone mineral density || id:ebi-a-GCST006979	Heel bone mineral density	Heel bone mineral density || ||	TRUE	igd	0.0088	62892	2.25398e-09	45599090	20	ebi-a-GCST006867	Type 2 diabetes || id:ebi-a-GCST006867	TRUE	reported	igd	1	TRUE
rs576674	A	G	A	G	-0.0654	0.0011447	0.832515	0.832891	FALSE	FALSE	FALSE	ebi-a-GCST006979	13	33554302	0.00248306	426824	0.22	Heel bone mineral density || id:ebi-a-GCST006979	Heel bone mineral density	Heel bone mineral density || ||	TRUE	igd	0.0097	62892	1.79184e-11	33554302	13	ebi-a-GCST006867	Type 2 diabetes || id:ebi-a-GCST006867	TRUE	reported	igd	1	TRUE
rs6059662	G	A	G	A	0.0446	0.010331	0.663176	0.654008	FALSE	FALSE	FALSE	ebi-a-GCST006979	20	32675727	0.00196139	426824	6.1e-05	Heel bone mineral density || id:ebi-a-GCST006979	Heel bone mineral density	Heel bone mineral density || ||	TRUE	igd	0.0079	62892	1.51199e-08	32675727	20	ebi-a-GCST006867	Type 2 diabetes || id:ebi-a-GCST006867	TRUE	reported	igd	1	TRUE
rs61953351	T	G	T	G	-0.07	-0.00167385	0.249902	0.250034	FALSE	FALSE	FALSE	ebi-a-GCST006979	12	121456616	0.00213249	426824	0.35	Heel bone mineral density || id:ebi-a-GCST006979	Heel bone mineral density	Heel bone mineral density || ||	TRUE	igd	0.0091	62892	1.97606e-14	121456616	12	ebi-a-GCST006867	Type 2 diabetes || id:ebi-a-GCST006867	TRUE	reported	igd	1	TRUE
rs622217	C	T	C	T	-0.0485	0.000960097	0.483932	0.482288	FALSE	FALSE	FALSE	ebi-a-GCST006979	6	160766770	0.00183491	426824	0.77	Heel bone mineral density || id:ebi-a-GCST006979	Heel bone mineral density	Heel bone mineral density || ||	TRUE	igd	0.0077	62892	3.12903e-10	160766770	6	ebi-a-GCST006867	Type 2 diabetes || id:ebi-a-GCST006867	TRUE	reported	igd	1	TRUE
rs6494307	G	C	G	C	-0.0443	0.00350126	0.426225	0.428313	FALSE	TRUE	TRUE	ebi-a-GCST006979	15	62394690	0.00187466	426824	0.0259998	Heel bone mineral density || id:ebi-a-GCST006979	Heel bone mineral density	Heel bone mineral density || ||	TRUE	igd	0.0078	62892	1.66802e-08	62394690	15	ebi-a-GCST006867	Type 2 diabetes || id:ebi-a-GCST006867	TRUE	reported	igd	1	TRUE
rs6515236	C	A	C	A	-0.0504	-0.00124711	0.24933	0.247834	FALSE	FALSE	FALSE	ebi-a-GCST006979	20	22435749	0.00215143	426824	0.16	Heel bone mineral density || id:ebi-a-GCST006979	Heel bone mineral density	Heel bone mineral density || ||	TRUE	igd	0.0091	62892	3.34303e-08	22435749	20	ebi-a-GCST006867	Type 2 diabetes || id:ebi-a-GCST006867	TRUE	reported	igd	1	TRUE
rs67232546	T	C	T	C	0.0596	0.00184687	0.209222	0.211825	FALSE	FALSE	FALSE	ebi-a-GCST006979	11	128398938	0.00226745	426824	0.64	Heel bone mineral density || id:ebi-a-GCST006979	Heel bone mineral density	Heel bone mineral density || ||	TRUE	igd	0.0096	62892	4.66101e-10	128398938	11	ebi-a-GCST006867	Type 2 diabetes || id:ebi-a-GCST006867	TRUE	reported	igd	1	TRUE
rs6767484	G	A	G	A	0.1209	0.0146525	0.312261	0.313547	FALSE	FALSE	FALSE	ebi-a-GCST006979	3	185520578	0.00198986	426824	3.69999e-08	Heel bone mineral density || id:ebi-a-GCST006979	Heel bone mineral density	Heel bone mineral density || ||	TRUE	igd	0.0076	62892	2.70085e-56	185520578	3	ebi-a-GCST006867	Type 2 diabetes || id:ebi-a-GCST006867	TRUE	reported	igd	1	TRUE
rs6785040	C	T	C	T	-0.0633	-0.00178358	0.15066	0.150434	FALSE	FALSE	FALSE	ebi-a-GCST006979	3	63897915	0.00258556	426824	0.4	Heel bone mineral density || id:ebi-a-GCST006979	Heel bone mineral density	Heel bone mineral density || ||	TRUE	igd	0.0111	62892	1.26401e-08	63897915	3	ebi-a-GCST006867	Type 2 diabetes || id:ebi-a-GCST006867	TRUE	reported	igd	1	TRUE
rs6795735	T	C	T	C	-0.0558	-0.00192283	0.410912	0.40553	FALSE	FALSE	FALSE	ebi-a-GCST006979	3	64705365	0.00188091	426824	0.31	Heel bone mineral density || id:ebi-a-GCST006979	Heel bone mineral density	Heel bone mineral density || ||	TRUE	igd	0.0073	62892	1.63005e-14	64705365	3	ebi-a-GCST006867	Type 2 diabetes || id:ebi-a-GCST006867	TRUE	reported	igd	1	TRUE
rs6878122	A	G	A	G	-0.0564	-0.0035081	0.681791	0.680191	FALSE	FALSE	FALSE	ebi-a-GCST006979	5	76427311	0.00198157	426824	0.12	Heel bone mineral density || id:ebi-a-GCST006979	Heel bone mineral density	Heel bone mineral density || ||	TRUE	igd	0.0079	62892	1.18796e-12	76427311	5	ebi-a-GCST006867	Type 2 diabetes || id:ebi-a-GCST006867	TRUE	reported	igd	1	TRUE
rs6960043	C	T	C	T	0.064	-0.0103063	0.521837	0.525508	FALSE	FALSE	FALSE	ebi-a-GCST006979	7	15052860	0.00182829	426824	1.5e-06	Heel bone mineral density || id:ebi-a-GCST006979	Heel bone mineral density	Heel bone mineral density || ||	TRUE	igd	0.0071	62892	3.61077e-19	15052860	7	ebi-a-GCST006867	Type 2 diabetes || id:ebi-a-GCST006867	TRUE	reported	igd	1	TRUE
rs7144011	T	G	T	G	0.0482	0.0068962	0.221063	0.222842	FALSE	FALSE	FALSE	ebi-a-GCST006979	14	79940383	0.00223219	426824	0.0860003	Heel bone mineral density || id:ebi-a-GCST006979	Heel bone mineral density	Heel bone mineral density || ||	TRUE	igd	0.0085	62892	1.63599e-08	79940383	14	ebi-a-GCST006867	Type 2 diabetes || id:ebi-a-GCST006867	TRUE	reported	igd	1	TRUE
rs7177055	A	G	A	G	0.0647	-0.00355399	0.718289	0.719019	FALSE	FALSE	FALSE	ebi-a-GCST006979	15	77832762	0.0020629	426824	0.0779992	Heel bone mineral density || id:ebi-a-GCST006979	Heel bone mineral density	Heel bone mineral density || ||	TRUE	igd	0.0079	62892	2.746e-16	77832762	15	ebi-a-GCST006867	Type 2 diabetes || id:ebi-a-GCST006867	TRUE	reported	igd	1	TRUE
rs7240767	C	T	C	T	0.0451	-0.0018892	0.383677	0.388311	FALSE	FALSE	FALSE	ebi-a-GCST006979	18	7070642	0.00190883	426824	0.42	Heel bone mineral density || id:ebi-a-GCST006979	Heel bone mineral density	Heel bone mineral density || ||	TRUE	igd	0.0081	62892	2.157e-08	7070642	18	ebi-a-GCST006867	Type 2 diabetes || id:ebi-a-GCST006867	TRUE	reported	igd	1	TRUE
rs72802358	C	G	C	G	-0.1168	-0.00711938	0.101594	0.101815	FALSE	TRUE	FALSE	ebi-a-GCST006979	16	75243657	0.00307616	426824	0.0299999	Heel bone mineral density || id:ebi-a-GCST006979	Heel bone mineral density	Heel bone mineral density || ||	TRUE	igd	0.0133	62892	1.97015e-18	75243657	16	ebi-a-GCST006867	Type 2 diabetes || id:ebi-a-GCST006867	TRUE	reported	igd	1	TRUE
rs72892910	T	G	T	G	0.0648	-0.000728895	0.172394	0.171998	FALSE	FALSE	FALSE	ebi-a-GCST006979	6	50816887	0.00243012	426824	0.34	Heel bone mineral density || id:ebi-a-GCST006979	Heel bone mineral density	Heel bone mineral density || ||	TRUE	igd	0.0099	62892	6.42836e-11	50816887	6	ebi-a-GCST006867	Type 2 diabetes || id:ebi-a-GCST006867	TRUE	reported	igd	1	TRUE
rs735949	C	T	C	T	-0.0711	0.0115704	0.14115	0.140077	FALSE	FALSE	FALSE	ebi-a-GCST006979	4	185716232	0.00266338	426824	1.89998e-05	Heel bone mineral density || id:ebi-a-GCST006979	Heel bone mineral density	Heel bone mineral density || ||	TRUE	igd	0.0106	62892	1.94581e-11	185716232	4	ebi-a-GCST006867	Type 2 diabetes || id:ebi-a-GCST006867	TRUE	reported	igd	1	TRUE
rs753270	C	T	C	T	0.0528	0.00203844	0.583535	0.583777	FALSE	FALSE	FALSE	ebi-a-GCST006979	10	80964975	0.00187779	426824	0.29	Heel bone mineral density || id:ebi-a-GCST006979	Heel bone mineral density	Heel bone mineral density || ||	TRUE	igd	0.0079	62892	2.70209e-11	80964975	10	ebi-a-GCST006867	Type 2 diabetes || id:ebi-a-GCST006867	TRUE	reported	igd	1	TRUE
rs7561798	G	A	G	A	0.04	-0.00153196	0.482171	0.479557	FALSE	FALSE	FALSE	ebi-a-GCST006979	2	228973660	0.0018297	426824	0.32	Heel bone mineral density || id:ebi-a-GCST006979	Heel bone mineral density	Heel bone mineral density || ||	TRUE	igd	0.0072	62892	2.79402e-08	228973660	2	ebi-a-GCST006867	Type 2 diabetes || id:ebi-a-GCST006867	TRUE	reported	igd	1	TRUE
rs7572970	G	A	G	A	0.059	-0.00350695	0.722047	0.721107	FALSE	FALSE	FALSE	ebi-a-GCST006979	2	161136656	0.0020405	426824	0.15	Heel bone mineral density || id:ebi-a-GCST006979	Heel bone mineral density	Heel bone mineral density || ||	TRUE	igd	0.0087	62892	1.39091e-11	161136656	2	ebi-a-GCST006867	Type 2 diabetes || id:ebi-a-GCST006867	TRUE	reported	igd	1	TRUE
rs7607777	T	G	T	G	-0.137	0.0255981	0.105906	0.106258	FALSE	FALSE	FALSE	ebi-a-GCST006979	2	43629931	0.00297257	426824	1.10002e-16	Heel bone mineral density || id:ebi-a-GCST006979	Heel bone mineral density	Heel bone mineral density || ||	TRUE	igd	0.0125	62892	9.39723e-28	43629931	2	ebi-a-GCST006867	Type 2 diabetes || id:ebi-a-GCST006867	TRUE	reported	igd	1	TRUE
rs7674212	T	G	T	G	-0.0465	0.00795093	0.408864	0.409401	FALSE	FALSE	FALSE	ebi-a-GCST006979	4	103988899	0.00188659	426824	0.000589997	Heel bone mineral density || id:ebi-a-GCST006979	Heel bone mineral density	Heel bone mineral density || ||	TRUE	igd	0.0075	62892	6.18201e-10	103988899	4	ebi-a-GCST006867	Type 2 diabetes || id:ebi-a-GCST006867	TRUE	reported	igd	1	TRUE
rs7685296	T	C	T	C	-0.0511	-0.00666309	0.279365	0.278461	FALSE	FALSE	FALSE	ebi-a-GCST006979	4	153254121	0.00206358	426824	0.0109999	Heel bone mineral density || id:ebi-a-GCST006979	Heel bone mineral density	Heel bone mineral density || ||	TRUE	igd	0.0081	62892	2.31702e-10	153254121	4	ebi-a-GCST006867	Type 2 diabetes || id:ebi-a-GCST006867	TRUE	reported	igd	1	TRUE
rs7729395	T	C	T	C	0.1373	0.00787023	0.0509409	0.053364	FALSE	FALSE	FALSE	ebi-a-GCST006979	5	102100576	0.00411138	426824	0.15	Heel bone mineral density || id:ebi-a-GCST006979	Heel bone mineral density	Heel bone mineral density || ||	TRUE	igd	0.016	62892	1.10103e-17	102100576	5	ebi-a-GCST006867	Type 2 diabetes || id:ebi-a-GCST006867	TRUE	reported	igd	1	TRUE
rs7756992	G	A	G	A	0.1297	-0.00190632	0.266896	0.265033	FALSE	FALSE	FALSE	ebi-a-GCST006979	6	20679709	0.00207143	426824	0.52	Heel bone mineral density || id:ebi-a-GCST006979	Heel bone mineral density	Heel bone mineral density || ||	TRUE	igd	0.0078	62892	5.99929e-62	20679709	6	ebi-a-GCST006867	Type 2 diabetes || id:ebi-a-GCST006867	TRUE	reported	igd	1	TRUE
rs7786095	G	A	G	A	-0.0743	0.00384861	0.10386	0.104532	FALSE	FALSE	FALSE	ebi-a-GCST006979	7	156983847	0.0029753	426824	0.69	Heel bone mineral density || id:ebi-a-GCST006979	Heel bone mineral density	Heel bone mineral density || ||	TRUE	igd	0.0129	62892	9.64295e-09	156983847	7	ebi-a-GCST006867	Type 2 diabetes || id:ebi-a-GCST006867	TRUE	reported	igd	1	TRUE
rs780094	C	T	C	T	0.0692	0.00434632	0.612845	0.618166	FALSE	FALSE	FALSE	ebi-a-GCST006979	2	27741237	0.00188242	426824	0.0329997	Heel bone mineral density || id:ebi-a-GCST006979	Heel bone mineral density	Heel bone mineral density || ||	TRUE	igd	0.0074	62892	5.15941e-21	27741237	2	ebi-a-GCST006867	Type 2 diabetes || id:ebi-a-GCST006867	TRUE	reported	igd	1	TRUE
rs7845219	C	T	C	T	-0.0422	0.0016539	0.492786	0.495763	FALSE	FALSE	FALSE	ebi-a-GCST006979	8	95937502	0.00185449	426824	0.6	Heel bone mineral density || id:ebi-a-GCST006979	Heel bone mineral density	Heel bone mineral density || ||	TRUE	igd	0.0072	62892	4.54496e-09	95937502	8	ebi-a-GCST006867	Type 2 diabetes || id:ebi-a-GCST006867	TRUE	reported	igd	1	TRUE
rs7903146	T	C	T	C	0.3059	0.0112731	0.291585	0.290178	FALSE	FALSE	FALSE	ebi-a-GCST006979	10	114758349	0.00202872	426824	8.10009e-09	Heel bone mineral density || id:ebi-a-GCST006979	Heel bone mineral density	Heel bone mineral density || ||	TRUE	igd	0.0077	62892	1e-200	114758349	10	ebi-a-GCST006867	Type 2 diabetes || id:ebi-a-GCST006867	TRUE	reported	igd	1	TRUE
rs7929543	C	A	C	A	0.0828	-0.0167041	0.0831599	0.083415	FALSE	FALSE	FALSE	ebi-a-GCST006979	11	49351026	0.00332732	426824	3.40001e-06	Heel bone mineral density || id:ebi-a-GCST006979	Heel bone mineral density	Heel bone mineral density || ||	TRUE	igd	0.0138	62892	2.19902e-09	49351026	11	ebi-a-GCST006867	Type 2 diabetes || id:ebi-a-GCST006867	TRUE	reported	igd	1	TRUE
rs7955901	T	C	T	C	-0.0444	-0.0019697	0.556668	0.558591	FALSE	FALSE	FALSE	ebi-a-GCST006979	12	71433293	0.00186326	426824	0.44	Heel bone mineral density || id:ebi-a-GCST006979	Heel bone mineral density	Heel bone mineral density || ||	TRUE	igd	0.0072	62892	7.16094e-10	71433293	12	ebi-a-GCST006867	Type 2 diabetes || id:ebi-a-GCST006867	TRUE	reported	igd	1	TRUE
rs8068804	A	G	A	G	0.0587	0.0119177	0.325097	0.327265	FALSE	FALSE	FALSE	ebi-a-GCST006979	17	3985864	0.00196991	426824	1.09999e-08	Heel bone mineral density || id:ebi-a-GCST006979	Heel bone mineral density	Heel bone mineral density || ||	TRUE	igd	0.0078	62892	4.41062e-14	3985864	17	ebi-a-GCST006867	Type 2 diabetes || id:ebi-a-GCST006867	TRUE	reported	igd	1	TRUE
rs8108269	G	T	G	T	0.0644	-0.00437139	0.281015	0.279369	FALSE	FALSE	FALSE	ebi-a-GCST006979	19	46158513	0.00206654	426824	0.0479999	Heel bone mineral density || id:ebi-a-GCST006979	Heel bone mineral density	Heel bone mineral density || ||	TRUE	igd	0.0079	62892	3.11387e-16	46158513	19	ebi-a-GCST006867	Type 2 diabetes || id:ebi-a-GCST006867	TRUE	reported	igd	1	TRUE
rs825476	T	C	T	C	0.0524	-0.011696	0.580549	0.580948	FALSE	FALSE	FALSE	ebi-a-GCST006979	12	124568456	0.00187017	426824	5.39995e-08	Heel bone mineral density || id:ebi-a-GCST006979	Heel bone mineral density	Heel bone mineral density || ||	TRUE	igd	0.0073	62892	6.80456e-13	124568456	12	ebi-a-GCST006867	Type 2 diabetes || id:ebi-a-GCST006867	TRUE	reported	igd	1	TRUE
rs840967	A	C	A	C	-0.0497	-0.00366581	0.605922	0.606395	FALSE	FALSE	FALSE	ebi-a-GCST006979	2	65701757	0.00187685	426824	0.77	Heel bone mineral density || id:ebi-a-GCST006979	Heel bone mineral density	Heel bone mineral density || ||	TRUE	igd	0.008	62892	5.44202e-10	65701757	2	ebi-a-GCST006867	Type 2 diabetes || id:ebi-a-GCST006867	TRUE	reported	igd	1	TRUE
rs849135	A	G	A	G	-0.0999	0.00627278	0.499052	0.500847	FALSE	FALSE	FALSE	ebi-a-GCST006979	7	28196413	0.00182147	426824	0.00569994	Heel bone mineral density || id:ebi-a-GCST006979	Heel bone mineral density	Heel bone mineral density || ||	TRUE	igd	0.0072	62892	1.04112e-43	28196413	7	ebi-a-GCST006867	Type 2 diabetes || id:ebi-a-GCST006867	TRUE	reported	igd	1	TRUE
rs853974	C	T	C	T	-0.0601	-0.0130183	0.737586	0.738987	FALSE	FALSE	FALSE	ebi-a-GCST006979	6	127068983	0.00208789	426824	1.6e-08	Heel bone mineral density || id:ebi-a-GCST006979	Heel bone mineral density	Heel bone mineral density || ||	TRUE	igd	0.0088	62892	7.85778e-12	127068983	6	ebi-a-GCST006867	Type 2 diabetes || id:ebi-a-GCST006867	TRUE	reported	igd	1	TRUE
rs9369425	A	G	A	G	-0.0546	-0.00131484	0.708185	0.707755	FALSE	FALSE	FALSE	ebi-a-GCST006979	6	43810974	0.00200914	426824	0.31	Heel bone mineral density || id:ebi-a-GCST006979	Heel bone mineral density	Heel bone mineral density || ||	TRUE	igd	0.0085	62892	1.12899e-10	43810974	6	ebi-a-GCST006867	Type 2 diabetes || id:ebi-a-GCST006867	TRUE	reported	igd	1	TRUE
rs963740	T	A	T	A	-0.0479	-0.0135123	0.294299	0.293962	FALSE	TRUE	FALSE	ebi-a-GCST006979	13	51096095	0.00203438	426824	2.70023e-11	Heel bone mineral density || id:ebi-a-GCST006979	Heel bone mineral density	Heel bone mineral density || ||	TRUE	igd	0.0086	62892	2.23198e-08	51096095	13	ebi-a-GCST006867	Type 2 diabetes || id:ebi-a-GCST006867	TRUE	reported	igd	1	TRUE
rs9844972	C	G	C	G	0.0956	0.0233299	0.0697229	0.071271	FALSE	TRUE	FALSE	ebi-a-GCST006979	3	150097635	0.00365005	426824	8.30004e-10	Heel bone mineral density || id:ebi-a-GCST006979	Heel bone mineral density	Heel bone mineral density || ||	TRUE	igd	0.0148	62892	1.02601e-10	150097635	3	ebi-a-GCST006867	Type 2 diabetes || id:ebi-a-GCST006867	TRUE	reported	igd	1	TRUE
rs9894220	G	A	G	A	-0.0585	-0.00200792	0.43374	0.434205	FALSE	FALSE	FALSE	ebi-a-GCST006979	17	46989154	0.0018625	426824	0.18	Heel bone mineral density || id:ebi-a-GCST006979	Heel bone mineral density	Heel bone mineral density || ||	TRUE	igd	0.0079	62892	1.51705e-13	46989154	17	ebi-a-GCST006867	Type 2 diabetes || id:ebi-a-GCST006867	TRUE	reported	igd	1	TRUE
rs9928094	G	A	G	A	0.1045	0.0194959	0.42602	0.422323	FALSE	FALSE	FALSE	ebi-a-GCST006979	16	53799905	0.00187318	426824	7.8001e-20	Heel bone mineral density || id:ebi-a-GCST006979	Heel bone mineral density	Heel bone mineral density || ||	TRUE	igd	0.0072	62892	3.58922e-47	53799905	16	ebi-a-GCST006867	Type 2 diabetes || id:ebi-a-GCST006867	TRUE	reported	igd	1	TRUE
rs993380	G	A	G	A	-0.0507	-0.00257692	0.66555	0.667463	FALSE	FALSE	FALSE	ebi-a-GCST006979	4	83584496	0.00195747	426824	0.0810009	Heel bone mineral density || id:ebi-a-GCST006979	Heel bone mineral density	Heel bone mineral density || ||	TRUE	igd	0.0081	62892	4.58701e-10	83584496	4	ebi-a-GCST006867	Type 2 diabetes || id:ebi-a-GCST006867	TRUE	reported	igd	1	TRUE
rs9940149	A	G	A	G	-0.058	0.00252691	0.178556	0.177706	FALSE	FALSE	FALSE	ebi-a-GCST006979	16	300641	0.00241884	426824	0.28	Heel bone mineral density || id:ebi-a-GCST006979	Heel bone mineral density	Heel bone mineral density || ||	TRUE	igd	0.0095	62892	9.29095e-10	300641	16	ebi-a-GCST006867	Type 2 diabetes || id:ebi-a-GCST006867	TRUE	reported	igd	1	TRUE

## Sheet: S5
Table S5. Mendelian randomization (MR) analysis of DM2 and LS-BMD
SNP	effect_allele.exposure	other_allele.exposure	effect_allele.outcome	other_allele.outcome	beta.exposure	beta.outcome	eaf.exposure	eaf.outcome	remove	palindromic	ambiguous	id.outcome	chr	pos	se.outcome	samplesize.outcome	pval.outcome	outcome	originalname.outcome	outcome.deprecated	mr_keep.outcome	data_source.outcome	se.exposure	samplesize.exposure	pval.exposure	pos.exposure	chr.exposure	id.exposure	exposure	mr_keep.exposure	pval_origin.exposure	data_source.exposure	action	mr_keep
rs10087241	A	G	A	G	-0.0475	-0.009405	0.594893	0.609944	FALSE	FALSE	FALSE	ieu-a-982	8	30863722	0.008918	44731	0.303008	Lumbar spine bone mineral density || id:ieu-a-982	Lumbar spine bone mineral density	Lumbar spine bone mineral density || ||	TRUE	igd	0.008	62892	2.79602e-09	30863722	8	ebi-a-GCST006867	Type 2 diabetes || id:ebi-a-GCST006867	TRUE	reported	igd	1	TRUE
rs1050226	G	A	G	A	-0.0491	-0.000909	0.406792	0.381782	FALSE	FALSE	FALSE	ieu-a-982	6	7281654	0.008886	44731	0.920427	Lumbar spine bone mineral density || id:ieu-a-982	Lumbar spine bone mineral density	Lumbar spine bone mineral density || ||	TRUE	igd	0.0074	62892	3.34195e-11	7281654	6	ebi-a-GCST006867	Type 2 diabetes || id:ebi-a-GCST006867	TRUE	reported	igd	1	TRUE
rs1063355	G	T	G	T	0.0709	-0.002425	0.602436	0.779395	FALSE	FALSE	FALSE	ieu-a-982	6	32627714	0.011533	44731	0.837259	Lumbar spine bone mineral density || id:ieu-a-982	Lumbar spine bone mineral density	Lumbar spine bone mineral density || ||	TRUE	igd	0.0079	62892	3.71535e-19	32627714	6	ebi-a-GCST006867	Type 2 diabetes || id:ebi-a-GCST006867	TRUE	reported	igd	1	TRUE
rs10740322	A	G	A	G	0.0477	0.000502	0.687104	0.648449	FALSE	FALSE	FALSE	ieu-a-982	10	71485458	0.009337	44731	0.958132	Lumbar spine bone mineral density || id:ieu-a-982	Lumbar spine bone mineral density	Lumbar spine bone mineral density || ||	TRUE	igd	0.0085	62892	2.10902e-08	71485458	10	ebi-a-GCST006867	Type 2 diabetes || id:ebi-a-GCST006867	TRUE	reported	igd	1	TRUE
rs10830963	G	C	G	C	0.0909	0.005328	0.275768	0.275338	FALSE	TRUE	FALSE	ieu-a-982	11	92708710	0.009938	44731	0.600588	Lumbar spine bone mineral density || id:ieu-a-982	Lumbar spine bone mineral density	Lumbar spine bone mineral density || ||	TRUE	igd	0.008	62892	5.84655e-30	92708710	11	ebi-a-GCST006867	Type 2 diabetes || id:ebi-a-GCST006867	TRUE	reported	igd	1	TRUE
rs11098676	C	T	C	T	0.054	0.015203	0.787639	0.738345	FALSE	FALSE	FALSE	ieu-a-982	4	123833154	0.010534	44731	0.15868	Lumbar spine bone mineral density || id:ieu-a-982	Lumbar spine bone mineral density	Lumbar spine bone mineral density || ||	TRUE	igd	0.0096	62892	2.02698e-08	123833154	4	ebi-a-GCST006867	Type 2 diabetes || id:ebi-a-GCST006867	TRUE	reported	igd	1	TRUE
rs11107116	T	G	T	G	0.0467	0.002948	0.219714	0.205648	FALSE	FALSE	FALSE	ieu-a-982	12	93978504	0.010416	44731	0.782208	Lumbar spine bone mineral density || id:ieu-a-982	Lumbar spine bone mineral density	Lumbar spine bone mineral density || ||	TRUE	igd	0.0085	62892	3.74999e-08	93978504	12	ebi-a-GCST006867	Type 2 diabetes || id:ebi-a-GCST006867	TRUE	reported	igd	1	TRUE
rs11257655	T	C	T	C	0.0737	0.006073	0.206773	0.247733	FALSE	FALSE	FALSE	ieu-a-982	10	12307894	0.010732	44731	0.58053	Lumbar spine bone mineral density || id:ieu-a-982	Lumbar spine bone mineral density	Lumbar spine bone mineral density || ||	TRUE	igd	0.0087	62892	1.96607e-17	12307894	10	ebi-a-GCST006867	Type 2 diabetes || id:ebi-a-GCST006867	TRUE	reported	igd	1	TRUE
rs1127655	T	C	T	C	-0.0438	0.00126	0.529064	0.547017	FALSE	FALSE	FALSE	ieu-a-982	1	117530507	0.00871	44731	0.887611	Lumbar spine bone mineral density || id:ieu-a-982	Lumbar spine bone mineral density	Lumbar spine bone mineral density || ||	TRUE	igd	0.0079	62892	2.47098e-08	117530507	1	ebi-a-GCST006867	Type 2 diabetes || id:ebi-a-GCST006867	TRUE	reported	igd	1	TRUE
rs11925227	A	G	A	G	-0.0534	0.008058	0.183439	0.168099	FALSE	FALSE	FALSE	ieu-a-982	3	170766618	0.011422	44731	0.490862	Lumbar spine bone mineral density || id:ieu-a-982	Lumbar spine bone mineral density	Lumbar spine bone mineral density || ||	TRUE	igd	0.0095	62892	2.24999e-08	170766618	3	ebi-a-GCST006867	Type 2 diabetes || id:ebi-a-GCST006867	TRUE	reported	igd	1	TRUE
rs11926707	C	T	C	T	0.0463	-0.002115	0.625556	0.570963	FALSE	FALSE	FALSE	ieu-a-982	3	46925539	0.009196	44731	0.82228	Lumbar spine bone mineral density || id:ieu-a-982	Lumbar spine bone mineral density	Lumbar spine bone mineral density || ||	TRUE	igd	0.0082	62892	1.68601e-08	46925539	3	ebi-a-GCST006867	Type 2 diabetes || id:ebi-a-GCST006867	TRUE	reported	igd	1	TRUE
rs12088739	G	A	G	A	-0.0884	0.014249	0.0898481	0.103739	FALSE	FALSE	FALSE	ieu-a-982	1	51506886	0.01516	44731	0.35862	Lumbar spine bone mineral density || id:ieu-a-982	Lumbar spine bone mineral density	Lumbar spine bone mineral density || ||	TRUE	igd	0.013	62892	9.79264e-12	51506886	1	ebi-a-GCST006867	Type 2 diabetes || id:ebi-a-GCST006867	TRUE	reported	igd	1	TRUE
rs12299509	G	A	G	A	0.0467	-0.000486	0.478622	0.445505	FALSE	FALSE	FALSE	ieu-a-982	12	4406281	0.009067	44731	0.958259	Lumbar spine bone mineral density || id:ieu-a-982	Lumbar spine bone mineral density	Lumbar spine bone mineral density || ||	TRUE	igd	0.0073	62892	2.08699e-10	4406281	12	ebi-a-GCST006867	Type 2 diabetes || id:ebi-a-GCST006867	TRUE	reported	igd	1	TRUE
rs12617659	T	C	T	C	-0.0685	-0.034258	0.147238	0.143596	FALSE	FALSE	FALSE	ieu-a-982	2	121309759	0.012485	44731	0.00738295	Lumbar spine bone mineral density || id:ieu-a-982	Lumbar spine bone mineral density	Lumbar spine bone mineral density || ||	TRUE	igd	0.0103	62892	2.82683e-11	121309759	2	ebi-a-GCST006867	Type 2 diabetes || id:ebi-a-GCST006867	TRUE	reported	igd	1	TRUE
rs12910825	G	A	G	A	0.0517	0.00234	0.360391	0.514161	FALSE	FALSE	FALSE	ieu-a-982	15	91511260	0.009834	44731	0.816198	Lumbar spine bone mineral density || id:ieu-a-982	Lumbar spine bone mineral density	Lumbar spine bone mineral density || ||	TRUE	igd	0.0074	62892	2.16421e-12	91511260	15	ebi-a-GCST006867	Type 2 diabetes || id:ebi-a-GCST006867	TRUE	reported	igd	1	TRUE
rs12945601	C	T	C	T	-0.048	-0.032512	0.613603	0.460302	FALSE	FALSE	FALSE	ieu-a-982	17	17653411	0.008984	44731	0.000410998	Lumbar spine bone mineral density || id:ieu-a-982	Lumbar spine bone mineral density	Lumbar spine bone mineral density || ||	TRUE	igd	0.008	62892	1.71799e-09	17653411	17	ebi-a-GCST006867	Type 2 diabetes || id:ebi-a-GCST006867	TRUE	reported	igd	1	TRUE
rs12970134	A	G	A	G	0.0555	0.01124	0.26512	0.242641	FALSE	FALSE	FALSE	ieu-a-982	18	57884750	0.010136	44731	0.278786	Lumbar spine bone mineral density || id:ieu-a-982	Lumbar spine bone mineral density	Lumbar spine bone mineral density || ||	TRUE	igd	0.008	62892	5.30884e-12	57884750	18	ebi-a-GCST006867	Type 2 diabetes || id:ebi-a-GCST006867	TRUE	reported	igd	1	TRUE
rs13234269	A	T	A	T	-0.0583	-0.009683	0.492515	0.424582	FALSE	TRUE	TRUE	ieu-a-982	7	130429186	0.008718	44731	0.277986	Lumbar spine bone mineral density || id:ieu-a-982	Lumbar spine bone mineral density	Lumbar spine bone mineral density || ||	TRUE	igd	0.0078	62892	6.9775e-14	130429186	7	ebi-a-GCST006867	Type 2 diabetes || id:ebi-a-GCST006867	TRUE	reported	igd	1	TRUE
rs13239186	T	C	T	C	0.0539	-0.004076	0.302029	0.253381	FALSE	FALSE	FALSE	ieu-a-982	7	117510621	0.009525	44731	0.676	Lumbar spine bone mineral density || id:ieu-a-982	Lumbar spine bone mineral density	Lumbar spine bone mineral density || ||	TRUE	igd	0.0085	62892	2.70402e-10	117510621	7	ebi-a-GCST006867	Type 2 diabetes || id:ebi-a-GCST006867	TRUE	reported	igd	1	TRUE
rs13330951	G	A	G	A	-0.0456	-0.007985	0.488314	0.412092	FALSE	FALSE	FALSE	ieu-a-982	16	69563842	0.00871	44731	0.370579	Lumbar spine bone mineral density || id:ieu-a-982	Lumbar spine bone mineral density	Lumbar spine bone mineral density || ||	TRUE	igd	0.0081	62892	1.53801e-08	69563842	16	ebi-a-GCST006867	Type 2 diabetes || id:ebi-a-GCST006867	TRUE	reported	igd	1	TRUE
rs1496653	G	A	G	A	-0.0769	-0.014447	0.204782	0.229356	FALSE	FALSE	FALSE	ieu-a-982	3	23454790	0.010807	44731	0.191666	Lumbar spine bone mineral density || id:ieu-a-982	Lumbar spine bone mineral density	Lumbar spine bone mineral density || ||	TRUE	igd	0.0088	62892	2.57217e-18	23454790	3	ebi-a-GCST006867	Type 2 diabetes || id:ebi-a-GCST006867	TRUE	reported	igd	1	TRUE
rs1552224	C	A	C	A	-0.1034	-0.004257	0.15421	0.129515	FALSE	FALSE	FALSE	ieu-a-982	11	72433098	0.012163	44731	0.732528	Lumbar spine bone mineral density || id:ieu-a-982	Lumbar spine bone mineral density	Lumbar spine bone mineral density || ||	TRUE	igd	0.0101	62892	8.63575e-25	72433098	11	ebi-a-GCST006867	Type 2 diabetes || id:ebi-a-GCST006867	TRUE	reported	igd	1	TRUE
rs16988333	G	A	G	A	-0.0745	0.028027	0.0904035	0.0688942	FALSE	FALSE	FALSE	ieu-a-982	22	30552813	0.01563	44731	0.0799098	Lumbar spine bone mineral density || id:ieu-a-982	Lumbar spine bone mineral density	Lumbar spine bone mineral density || ||	TRUE	igd	0.013	62892	9.16896e-09	30552813	22	ebi-a-GCST006867	Type 2 diabetes || id:ebi-a-GCST006867	TRUE	reported	igd	1	TRUE
rs17086692	T	G	T	G	-0.0467	0.002	0.313426	0.294193	FALSE	FALSE	FALSE	ieu-a-982	4	53134293	0.009388	44731	0.835179	Lumbar spine bone mineral density || id:ieu-a-982	Lumbar spine bone mineral density	Lumbar spine bone mineral density || ||	TRUE	igd	0.0084	62892	2.48102e-08	53134293	4	ebi-a-GCST006867	Type 2 diabetes || id:ebi-a-GCST006867	TRUE	reported	igd	1	TRUE
rs17405722	A	G	A	G	0.087	0.024344	0.0741526	0.0658711	FALSE	FALSE	FALSE	ieu-a-982	17	40542501	0.017082	44731	0.16395	Lumbar spine bone mineral density || id:ieu-a-982	Lumbar spine bone mineral density	Lumbar spine bone mineral density || ||	TRUE	igd	0.0146	62892	2.27798e-09	40542501	17	ebi-a-GCST006867	Type 2 diabetes || id:ebi-a-GCST006867	TRUE	reported	igd	1	TRUE
rs17411031	G	C	G	C	-0.045	0.003027	0.261729	0.257518	FALSE	TRUE	FALSE	ieu-a-982	8	19852310	0.009928	44731	0.765896	Lumbar spine bone mineral density || id:ieu-a-982	Lumbar spine bone mineral density	Lumbar spine bone mineral density || ||	TRUE	igd	0.0081	62892	3.03501e-08	19852310	8	ebi-a-GCST006867	Type 2 diabetes || id:ebi-a-GCST006867	TRUE	reported	igd	1	TRUE
rs1758632	G	C	G	C	0.0491	-0.012413	0.623407	0.62864	FALSE	TRUE	FALSE	ieu-a-982	9	34025640	0.009063	44731	0.180966	Lumbar spine bone mineral density || id:ieu-a-982	Lumbar spine bone mineral density	Lumbar spine bone mineral density || ||	TRUE	igd	0.0081	62892	1.36e-09	34025640	9	ebi-a-GCST006867	Type 2 diabetes || id:ebi-a-GCST006867	TRUE	reported	igd	1	TRUE
rs17631783	T	C	T	C	-0.0487	0.004242	0.26346	0.223787	FALSE	FALSE	FALSE	ieu-a-982	17	61687600	0.010045	44731	0.680033	Lumbar spine bone mineral density || id:ieu-a-982	Lumbar spine bone mineral density	Lumbar spine bone mineral density || ||	TRUE	igd	0.0089	62892	3.94903e-08	61687600	17	ebi-a-GCST006867	Type 2 diabetes || id:ebi-a-GCST006867	TRUE	reported	igd	1	TRUE
rs17791513	G	A	G	A	-0.1027	-0.026291	0.0605985	0.0711217	FALSE	FALSE	FALSE	ieu-a-982	9	81905590	0.01805	44731	0.154847	Lumbar spine bone mineral density || id:ieu-a-982	Lumbar spine bone mineral density	Lumbar spine bone mineral density || ||	TRUE	igd	0.0148	62892	4.61424e-12	81905590	9	ebi-a-GCST006867	Type 2 diabetes || id:ebi-a-GCST006867	TRUE	reported	igd	1	TRUE
rs1899951	T	C	T	C	-0.1118	-0.004053	0.123288	0.172076	FALSE	FALSE	FALSE	ieu-a-982	3	12394840	0.013254	44731	0.765225	Lumbar spine bone mineral density || id:ieu-a-982	Lumbar spine bone mineral density	Lumbar spine bone mineral density || ||	TRUE	igd	0.0109	62892	1.63682e-24	12394840	3	ebi-a-GCST006867	Type 2 diabetes || id:ebi-a-GCST006867	TRUE	reported	igd	1	TRUE
rs2058913	T	A	T	A	-0.0491	-0.004829	0.565008	0.486078	FALSE	TRUE	TRUE	ieu-a-982	15	63831869	0.008885	44731	0.595606	Lumbar spine bone mineral density || id:ieu-a-982	Lumbar spine bone mineral density	Lumbar spine bone mineral density || ||	TRUE	igd	0.0078	62892	3.26099e-10	63831869	15	ebi-a-GCST006867	Type 2 diabetes || id:ebi-a-GCST006867	TRUE	reported	igd	1	TRUE
rs2237892	T	C	T	C	-0.096	0.035521	0.0624896	0.0950676	FALSE	FALSE	FALSE	ieu-a-982	11	2839751	0.018352	44731	0.0587286	Lumbar spine bone mineral density || id:ieu-a-982	Lumbar spine bone mineral density	Lumbar spine bone mineral density || ||	TRUE	igd	0.0157	62892	8.74601e-10	2839751	11	ebi-a-GCST006867	Type 2 diabetes || id:ebi-a-GCST006867	TRUE	reported	igd	1	TRUE
rs2246618	T	C	T	C	0.0513	0.005556	0.307253	0.30008	FALSE	FALSE	FALSE	ieu-a-982	6	31478986	0.009828	44731	0.580863	Lumbar spine bone mineral density || id:ieu-a-982	Lumbar spine bone mineral density	Lumbar spine bone mineral density || ||	TRUE	igd	0.0084	62892	1.20301e-09	31478986	6	ebi-a-GCST006867	Type 2 diabetes || id:ebi-a-GCST006867	TRUE	reported	igd	1	TRUE
rs2299383	T	C	T	C	0.0412	0.00786	0.423455	0.421082	FALSE	FALSE	FALSE	ieu-a-982	7	103418846	0.008803	44731	0.383145	Lumbar spine bone mineral density || id:ieu-a-982	Lumbar spine bone mineral density	Lumbar spine bone mineral density || ||	TRUE	igd	0.0073	62892	1.49001e-08	103418846	7	ebi-a-GCST006867	Type 2 diabetes || id:ebi-a-GCST006867	TRUE	reported	igd	1	TRUE
rs243019	C	T	C	T	0.0566	-0.004363	0.455831	0.474224	FALSE	FALSE	FALSE	ieu-a-982	2	60585806	0.008759	44731	0.626672	Lumbar spine bone mineral density || id:ieu-a-982	Lumbar spine bone mineral density	Lumbar spine bone mineral density || ||	TRUE	igd	0.0071	62892	2.28981e-15	60585806	2	ebi-a-GCST006867	Type 2 diabetes || id:ebi-a-GCST006867	TRUE	reported	igd	1	TRUE
rs2493394	G	A	G	A	0.073	0.007711	0.107338	0.139777	FALSE	FALSE	FALSE	ieu-a-982	1	120471224	0.014084	44731	0.592893	Lumbar spine bone mineral density || id:ieu-a-982	Lumbar spine bone mineral density	Lumbar spine bone mineral density || ||	TRUE	igd	0.0113	62892	1.15101e-10	120471224	1	ebi-a-GCST006867	Type 2 diabetes || id:ebi-a-GCST006867	TRUE	reported	igd	1	TRUE
rs2796441	A	G	A	G	-0.0715	0.002944	0.416458	0.41066	FALSE	FALSE	FALSE	ieu-a-982	9	84308948	0.00898	44731	0.748799	Lumbar spine bone mineral density || id:ieu-a-982	Lumbar spine bone mineral density	Lumbar spine bone mineral density || ||	TRUE	igd	0.0073	62892	1.962e-22	84308948	9	ebi-a-GCST006867	Type 2 diabetes || id:ebi-a-GCST006867	TRUE	reported	igd	1	TRUE
rs2820426	G	A	G	A	0.0521	0.009295	0.610058	0.557279	FALSE	FALSE	FALSE	ieu-a-982	1	219660535	0.009048	44731	0.315705	Lumbar spine bone mineral density || id:ieu-a-982	Lumbar spine bone mineral density	Lumbar spine bone mineral density || ||	TRUE	igd	0.0073	62892	1.30197e-12	219660535	1	ebi-a-GCST006867	Type 2 diabetes || id:ebi-a-GCST006867	TRUE	reported	igd	1	TRUE
rs2867125	C	T	C	T	0.0601	0.003127	0.827825	0.841687	FALSE	FALSE	FALSE	ieu-a-982	2	622827	0.011772	44731	0.795278	Lumbar spine bone mineral density || id:ieu-a-982	Lumbar spine bone mineral density	Lumbar spine bone mineral density || ||	TRUE	igd	0.0096	62892	4.32504e-10	622827	2	ebi-a-GCST006867	Type 2 diabetes || id:ebi-a-GCST006867	TRUE	reported	igd	1	TRUE
rs2908282	A	G	A	G	0.0552	0.007058	0.177395	0.187828	FALSE	FALSE	FALSE	ieu-a-982	7	44248828	0.013411	44731	0.607288	Lumbar spine bone mineral density || id:ieu-a-982	Lumbar spine bone mineral density	Lumbar spine bone mineral density || ||	TRUE	igd	0.0094	62892	4.25001e-09	44248828	7	ebi-a-GCST006867	Type 2 diabetes || id:ebi-a-GCST006867	TRUE	reported	igd	1	TRUE
rs2925979	C	T	C	T	-0.0534	-0.015091	0.70085	0.701114	FALSE	FALSE	FALSE	ieu-a-982	16	81534790	0.009481	44731	0.120049	Lumbar spine bone mineral density || id:ieu-a-982	Lumbar spine bone mineral density	Lumbar spine bone mineral density || ||	TRUE	igd	0.0078	62892	9.0615e-12	81534790	16	ebi-a-GCST006867	Type 2 diabetes || id:ebi-a-GCST006867	TRUE	reported	igd	1	TRUE
rs2943656	G	A	G	A	0.0902	0.01708	0.635133	0.670485	FALSE	FALSE	FALSE	ieu-a-982	2	227121918	0.009062	44731	0.065675	Lumbar spine bone mineral density || id:ieu-a-982	Lumbar spine bone mineral density	Lumbar spine bone mineral density || ||	TRUE	igd	0.0074	62892	6.6973e-34	227121918	2	ebi-a-GCST006867	Type 2 diabetes || id:ebi-a-GCST006867	TRUE	reported	igd	1	TRUE
rs3217992	T	C	T	C	0.0527	0.00706	0.369901	0.359427	FALSE	FALSE	FALSE	ieu-a-982	9	22003223	0.00906	44731	0.446655	Lumbar spine bone mineral density || id:ieu-a-982	Lumbar spine bone mineral density	Lumbar spine bone mineral density || ||	TRUE	igd	0.0073	62892	7.2277e-13	22003223	9	ebi-a-GCST006867	Type 2 diabetes || id:ebi-a-GCST006867	TRUE	reported	igd	1	TRUE
rs340874	C	T	C	T	0.0626	0.000126	0.563904	0.492124	FALSE	FALSE	FALSE	ieu-a-982	1	214159256	0.008764	44731	0.988829	Lumbar spine bone mineral density || id:ieu-a-982	Lumbar spine bone mineral density	Lumbar spine bone mineral density || ||	TRUE	igd	0.0073	62892	8.40621e-18	214159256	1	ebi-a-GCST006867	Type 2 diabetes || id:ebi-a-GCST006867	TRUE	reported	igd	1	TRUE
rs348330	A	G	A	G	-0.0487	0.005386	0.633451	0.537072	FALSE	FALSE	FALSE	ieu-a-982	1	229672955	0.009997	44731	0.59874	Lumbar spine bone mineral density || id:ieu-a-982	Lumbar spine bone mineral density	Lumbar spine bone mineral density || ||	TRUE	igd	0.0081	62892	1.86402e-09	229672955	1	ebi-a-GCST006867	Type 2 diabetes || id:ebi-a-GCST006867	TRUE	reported	igd	1	TRUE
rs3756784	G	T	G	T	0.0505	0.010198	0.185838	0.278282	FALSE	FALSE	FALSE	ieu-a-982	6	131950233	0.011235	44731	0.375368	Lumbar spine bone mineral density || id:ieu-a-982	Lumbar spine bone mineral density	Lumbar spine bone mineral density || ||	TRUE	igd	0.0091	62892	2.58899e-08	131950233	6	ebi-a-GCST006867	Type 2 diabetes || id:ebi-a-GCST006867	TRUE	reported	igd	1	TRUE
rs459193	G	A	G	A	0.0711	-0.002516	0.745338	0.692761	FALSE	FALSE	FALSE	ieu-a-982	5	55806751	0.009988	44731	0.805626	Lumbar spine bone mineral density || id:ieu-a-982	Lumbar spine bone mineral density	Lumbar spine bone mineral density || ||	TRUE	igd	0.0083	62892	8.80846e-18	55806751	5	ebi-a-GCST006867	Type 2 diabetes || id:ebi-a-GCST006867	TRUE	reported	igd	1	TRUE
rs4622883	G	A	G	A	-0.0435	0.003059	0.508544	0.480191	FALSE	FALSE	FALSE	ieu-a-982	3	152188290	0.008772	44731	0.733468	Lumbar spine bone mineral density || id:ieu-a-982	Lumbar spine bone mineral density	Lumbar spine bone mineral density || ||	TRUE	igd	0.0078	62892	3.01599e-08	152188290	3	ebi-a-GCST006867	Type 2 diabetes || id:ebi-a-GCST006867	TRUE	reported	igd	1	TRUE
rs4686471	C	T	C	T	0.0534	-0.000993	0.609775	0.681623	FALSE	FALSE	FALSE	ieu-a-982	3	187740899	0.008922	44731	0.913434	Lumbar spine bone mineral density || id:ieu-a-982	Lumbar spine bone mineral density	Lumbar spine bone mineral density || ||	TRUE	igd	0.0081	62892	4.28154e-11	187740899	3	ebi-a-GCST006867	Type 2 diabetes || id:ebi-a-GCST006867	TRUE	reported	igd	1	TRUE
rs4812829	A	G	A	G	0.0532	0.01353	0.160871	0.193954	FALSE	FALSE	FALSE	ieu-a-982	20	42989267	0.011651	44731	0.256702	Lumbar spine bone mineral density || id:ieu-a-982	Lumbar spine bone mineral density	Lumbar spine bone mineral density || ||	TRUE	igd	0.0095	62892	2.44298e-08	42989267	20	ebi-a-GCST006867	Type 2 diabetes || id:ebi-a-GCST006867	TRUE	reported	igd	1	TRUE
rs55966194	G	C	G	C	-0.0526	0.005466	0.281312	0.235959	FALSE	TRUE	FALSE	ieu-a-982	20	45599090	0.009693	44731	0.581855	Lumbar spine bone mineral density || id:ieu-a-982	Lumbar spine bone mineral density	Lumbar spine bone mineral density || ||	TRUE	igd	0.0088	62892	2.25398e-09	45599090	20	ebi-a-GCST006867	Type 2 diabetes || id:ebi-a-GCST006867	TRUE	reported	igd	1	TRUE
rs576674	A	G	A	G	-0.0654	-0.005541	0.832515	0.772633	FALSE	FALSE	FALSE	ieu-a-982	13	33554302	0.012004	44731	0.652119	Lumbar spine bone mineral density || id:ieu-a-982	Lumbar spine bone mineral density	Lumbar spine bone mineral density || ||	TRUE	igd	0.0097	62892	1.79184e-11	33554302	13	ebi-a-GCST006867	Type 2 diabetes || id:ebi-a-GCST006867	TRUE	reported	igd	1	TRUE
rs6059662	G	A	G	A	0.0446	0.006303	0.663176	0.722514	FALSE	FALSE	FALSE	ieu-a-982	20	32675727	0.011263	44731	0.584686	Lumbar spine bone mineral density || id:ieu-a-982	Lumbar spine bone mineral density	Lumbar spine bone mineral density || ||	TRUE	igd	0.0079	62892	1.51199e-08	32675727	20	ebi-a-GCST006867	Type 2 diabetes || id:ebi-a-GCST006867	TRUE	reported	igd	1	TRUE
rs61953351	T	G	T	G	-0.07	-0.004644	0.249902	0.221877	FALSE	FALSE	FALSE	ieu-a-982	12	121456616	0.010127	44731	0.654226	Lumbar spine bone mineral density || id:ieu-a-982	Lumbar spine bone mineral density	Lumbar spine bone mineral density || ||	TRUE	igd	0.0091	62892	1.97606e-14	121456616	12	ebi-a-GCST006867	Type 2 diabetes || id:ebi-a-GCST006867	TRUE	reported	igd	1	TRUE
rs6494307	G	C	G	C	-0.0443	0.004341	0.426225	0.446858	FALSE	TRUE	TRUE	ieu-a-982	15	62394690	0.008859	44731	0.632295	Lumbar spine bone mineral density || id:ieu-a-982	Lumbar spine bone mineral density	Lumbar spine bone mineral density || ||	TRUE	igd	0.0078	62892	1.66802e-08	62394690	15	ebi-a-GCST006867	Type 2 diabetes || id:ebi-a-GCST006867	TRUE	reported	igd	1	TRUE
rs6515236	C	A	C	A	-0.0504	-0.007002	0.24933	0.337152	FALSE	FALSE	FALSE	ieu-a-982	20	22435749	0.009986	44731	0.493521	Lumbar spine bone mineral density || id:ieu-a-982	Lumbar spine bone mineral density	Lumbar spine bone mineral density || ||	TRUE	igd	0.0091	62892	3.34303e-08	22435749	20	ebi-a-GCST006867	Type 2 diabetes || id:ebi-a-GCST006867	TRUE	reported	igd	1	TRUE
rs67232546	T	C	T	C	0.0596	0.035006	0.209222	0.196977	FALSE	FALSE	FALSE	ieu-a-982	11	128398938	0.01076	44731	0.001493	Lumbar spine bone mineral density || id:ieu-a-982	Lumbar spine bone mineral density	Lumbar spine bone mineral density || ||	TRUE	igd	0.0096	62892	4.66101e-10	128398938	11	ebi-a-GCST006867	Type 2 diabetes || id:ebi-a-GCST006867	TRUE	reported	igd	1	TRUE
rs6767484	G	A	G	A	0.1209	0.028467	0.312261	0.349085	FALSE	FALSE	FALSE	ieu-a-982	3	185520578	0.011142	44731	0.0126069	Lumbar spine bone mineral density || id:ieu-a-982	Lumbar spine bone mineral density	Lumbar spine bone mineral density || ||	TRUE	igd	0.0076	62892	2.70085e-56	185520578	3	ebi-a-GCST006867	Type 2 diabetes || id:ebi-a-GCST006867	TRUE	reported	igd	1	TRUE
rs6785040	C	T	C	T	-0.0633	-0.019013	0.15066	0.189499	FALSE	FALSE	FALSE	ieu-a-982	3	63897915	0.011924	44731	0.119412	Lumbar spine bone mineral density || id:ieu-a-982	Lumbar spine bone mineral density	Lumbar spine bone mineral density || ||	TRUE	igd	0.0111	62892	1.26401e-08	63897915	3	ebi-a-GCST006867	Type 2 diabetes || id:ebi-a-GCST006867	TRUE	reported	igd	1	TRUE
rs6795735	T	C	T	C	-0.0558	0.006083	0.410912	0.528719	FALSE	FALSE	FALSE	ieu-a-982	3	64705365	0.00976	44731	0.542711	Lumbar spine bone mineral density || id:ieu-a-982	Lumbar spine bone mineral density	Lumbar spine bone mineral density || ||	TRUE	igd	0.0073	62892	1.63005e-14	64705365	3	ebi-a-GCST006867	Type 2 diabetes || id:ebi-a-GCST006867	TRUE	reported	igd	1	TRUE
rs6960043	C	T	C	T	0.064	-1.3e-05	0.521837	0.46786	FALSE	FALSE	FALSE	ieu-a-982	7	15052860	0.008745	44731	0.998883	Lumbar spine bone mineral density || id:ieu-a-982	Lumbar spine bone mineral density	Lumbar spine bone mineral density || ||	TRUE	igd	0.0071	62892	3.61077e-19	15052860	7	ebi-a-GCST006867	Type 2 diabetes || id:ebi-a-GCST006867	TRUE	reported	igd	1	TRUE
rs7177055	A	G	A	G	0.0647	-0.006656	0.718289	0.618616	FALSE	FALSE	FALSE	ieu-a-982	15	77832762	0.009665	44731	0.501206	Lumbar spine bone mineral density || id:ieu-a-982	Lumbar spine bone mineral density	Lumbar spine bone mineral density || ||	TRUE	igd	0.0079	62892	2.746e-16	77832762	15	ebi-a-GCST006867	Type 2 diabetes || id:ebi-a-GCST006867	TRUE	reported	igd	1	TRUE
rs7240767	C	T	C	T	0.0451	-0.00783	0.383677	0.469292	FALSE	FALSE	FALSE	ieu-a-982	18	7070642	0.009022	44731	0.396644	Lumbar spine bone mineral density || id:ieu-a-982	Lumbar spine bone mineral density	Lumbar spine bone mineral density || ||	TRUE	igd	0.0081	62892	2.157e-08	7070642	18	ebi-a-GCST006867	Type 2 diabetes || id:ebi-a-GCST006867	TRUE	reported	igd	1	TRUE
rs72802358	C	G	C	G	-0.1168	0.000221	0.101594	0.121082	FALSE	TRUE	FALSE	ieu-a-982	16	75243657	0.014125	44731	0.987826	Lumbar spine bone mineral density || id:ieu-a-982	Lumbar spine bone mineral density	Lumbar spine bone mineral density || ||	TRUE	igd	0.0133	62892	1.97015e-18	75243657	16	ebi-a-GCST006867	Type 2 diabetes || id:ebi-a-GCST006867	TRUE	reported	igd	1	TRUE
rs753270	C	T	C	T	0.0528	-0.001155	0.583535	0.605489	FALSE	FALSE	FALSE	ieu-a-982	10	80964975	0.008862	44731	0.898675	Lumbar spine bone mineral density || id:ieu-a-982	Lumbar spine bone mineral density	Lumbar spine bone mineral density || ||	TRUE	igd	0.0079	62892	2.70209e-11	80964975	10	ebi-a-GCST006867	Type 2 diabetes || id:ebi-a-GCST006867	TRUE	reported	igd	1	TRUE
rs7572970	G	A	G	A	0.059	0.013756	0.722047	0.718218	FALSE	FALSE	FALSE	ieu-a-982	2	161136656	0.009691	44731	0.165642	Lumbar spine bone mineral density || id:ieu-a-982	Lumbar spine bone mineral density	Lumbar spine bone mineral density || ||	TRUE	igd	0.0087	62892	1.39091e-11	161136656	2	ebi-a-GCST006867	Type 2 diabetes || id:ebi-a-GCST006867	TRUE	reported	igd	1	TRUE
rs7756992	G	A	G	A	0.1297	0.004926	0.266896	0.326253	FALSE	FALSE	FALSE	ieu-a-982	6	20679709	0.009871	44731	0.625979	Lumbar spine bone mineral density || id:ieu-a-982	Lumbar spine bone mineral density	Lumbar spine bone mineral density || ||	TRUE	igd	0.0078	62892	5.99929e-62	20679709	6	ebi-a-GCST006867	Type 2 diabetes || id:ebi-a-GCST006867	TRUE	reported	igd	1	TRUE
rs7786095	G	A	G	A	-0.0743	-0.000982	0.10386	0.0983294	FALSE	FALSE	FALSE	ieu-a-982	7	156983847	0.014105	44731	0.945764	Lumbar spine bone mineral density || id:ieu-a-982	Lumbar spine bone mineral density	Lumbar spine bone mineral density || ||	TRUE	igd	0.0129	62892	9.64295e-09	156983847	7	ebi-a-GCST006867	Type 2 diabetes || id:ebi-a-GCST006867	TRUE	reported	igd	1	TRUE
rs780094	C	T	C	T	0.0692	0.022082	0.612845	0.647255	FALSE	FALSE	FALSE	ieu-a-982	2	27741237	0.008935	44731	0.0158121	Lumbar spine bone mineral density || id:ieu-a-982	Lumbar spine bone mineral density	Lumbar spine bone mineral density || ||	TRUE	igd	0.0074	62892	5.15941e-21	27741237	2	ebi-a-GCST006867	Type 2 diabetes || id:ebi-a-GCST006867	TRUE	reported	igd	1	TRUE
rs7903146	T	C	T	C	0.3059	-0.01186	0.291585	0.26611	FALSE	FALSE	FALSE	ieu-a-982	10	114758349	0.009613	44731	0.228223	Lumbar spine bone mineral density || id:ieu-a-982	Lumbar spine bone mineral density	Lumbar spine bone mineral density || ||	TRUE	igd	0.0077	62892	1e-200	114758349	10	ebi-a-GCST006867	Type 2 diabetes || id:ebi-a-GCST006867	TRUE	reported	igd	1	TRUE
rs7929543	C	A	C	A	0.0828	0.006261	0.0831599	0.121798	FALSE	FALSE	FALSE	ieu-a-982	11	49351026	0.016069	44731	0.703578	Lumbar spine bone mineral density || id:ieu-a-982	Lumbar spine bone mineral density	Lumbar spine bone mineral density || ||	TRUE	igd	0.0138	62892	2.19902e-09	49351026	11	ebi-a-GCST006867	Type 2 diabetes || id:ebi-a-GCST006867	TRUE	reported	igd	1	TRUE
rs7955901	T	C	T	C	-0.0444	0.000568	0.556668	0.558075	FALSE	FALSE	FALSE	ieu-a-982	12	71433293	0.008834	44731	0.949921	Lumbar spine bone mineral density || id:ieu-a-982	Lumbar spine bone mineral density	Lumbar spine bone mineral density || ||	TRUE	igd	0.0072	62892	7.16094e-10	71433293	12	ebi-a-GCST006867	Type 2 diabetes || id:ebi-a-GCST006867	TRUE	reported	igd	1	TRUE
rs8108269	G	T	G	T	0.0644	0.012826	0.281015	0.327049	FALSE	FALSE	FALSE	ieu-a-982	19	46158513	0.009603	44731	0.192032	Lumbar spine bone mineral density || id:ieu-a-982	Lumbar spine bone mineral density	Lumbar spine bone mineral density || ||	TRUE	igd	0.0079	62892	3.11387e-16	46158513	19	ebi-a-GCST006867	Type 2 diabetes || id:ebi-a-GCST006867	TRUE	reported	igd	1	TRUE
rs840967	A	C	A	C	-0.0497	-0.010056	0.605922	0.631106	FALSE	FALSE	FALSE	ieu-a-982	2	65701757	0.008964	44731	0.273262	Lumbar spine bone mineral density || id:ieu-a-982	Lumbar spine bone mineral density	Lumbar spine bone mineral density || ||	TRUE	igd	0.008	62892	5.44202e-10	65701757	2	ebi-a-GCST006867	Type 2 diabetes || id:ebi-a-GCST006867	TRUE	reported	igd	1	TRUE
rs849135	A	G	A	G	-0.0999	-0.00711	0.499052	0.406126	FALSE	FALSE	FALSE	ieu-a-982	7	28196413	0.010334	44731	0.501644	Lumbar spine bone mineral density || id:ieu-a-982	Lumbar spine bone mineral density	Lumbar spine bone mineral density || ||	TRUE	igd	0.0072	62892	1.04112e-43	28196413	7	ebi-a-GCST006867	Type 2 diabetes || id:ebi-a-GCST006867	TRUE	reported	igd	1	TRUE
rs853974	C	T	C	T	-0.0601	-0.026646	0.737586	0.724264	FALSE	FALSE	FALSE	ieu-a-982	6	127068983	0.009846	44731	0.00823304	Lumbar spine bone mineral density || id:ieu-a-982	Lumbar spine bone mineral density	Lumbar spine bone mineral density || ||	TRUE	igd	0.0088	62892	7.85778e-12	127068983	6	ebi-a-GCST006867	Type 2 diabetes || id:ebi-a-GCST006867	TRUE	reported	igd	1	TRUE
rs9369425	A	G	A	G	-0.0546	0.001683	0.708185	0.708115	FALSE	FALSE	FALSE	ieu-a-982	6	43810974	0.009599	44731	0.863978	Lumbar spine bone mineral density || id:ieu-a-982	Lumbar spine bone mineral density	Lumbar spine bone mineral density || ||	TRUE	igd	0.0085	62892	1.12899e-10	43810974	6	ebi-a-GCST006867	Type 2 diabetes || id:ebi-a-GCST006867	TRUE	reported	igd	1	TRUE
rs963740	T	A	T	A	-0.0479	0.002919	0.294299	0.308751	FALSE	TRUE	FALSE	ieu-a-982	13	51096095	0.009455	44731	0.763031	Lumbar spine bone mineral density || id:ieu-a-982	Lumbar spine bone mineral density	Lumbar spine bone mineral density || ||	TRUE	igd	0.0086	62892	2.23198e-08	51096095	13	ebi-a-GCST006867	Type 2 diabetes || id:ebi-a-GCST006867	TRUE	reported	igd	1	TRUE
rs9844972	C	G	C	G	0.0956	0.043511	0.0697229	0.0498807	FALSE	TRUE	FALSE	ieu-a-982	3	150097635	0.017572	44731	0.0156131	Lumbar spine bone mineral density || id:ieu-a-982	Lumbar spine bone mineral density	Lumbar spine bone mineral density || ||	TRUE	igd	0.0148	62892	1.02601e-10	150097635	3	ebi-a-GCST006867	Type 2 diabetes || id:ebi-a-GCST006867	TRUE	reported	igd	1	TRUE
rs9894220	G	A	G	A	-0.0585	-0.000231	0.43374	0.400796	FALSE	FALSE	FALSE	ieu-a-982	17	46989154	0.008865	44731	0.979707	Lumbar spine bone mineral density || id:ieu-a-982	Lumbar spine bone mineral density	Lumbar spine bone mineral density || ||	TRUE	igd	0.0079	62892	1.51705e-13	46989154	17	ebi-a-GCST006867	Type 2 diabetes || id:ebi-a-GCST006867	TRUE	reported	igd	1	TRUE
rs993380	G	A	G	A	-0.0507	-0.003509	0.66555	0.639857	FALSE	FALSE	FALSE	ieu-a-982	4	83584496	0.009154	44731	0.708171	Lumbar spine bone mineral density || id:ieu-a-982	Lumbar spine bone mineral density	Lumbar spine bone mineral density || ||	TRUE	igd	0.0081	62892	4.58701e-10	83584496	4	ebi-a-GCST006867	Type 2 diabetes || id:ebi-a-GCST006867	TRUE	reported	igd	1	TRUE
rs9940149	A	G	A	G	-0.058	0.008647	0.178556	0.263246	FALSE	FALSE	FALSE	ieu-a-982	16	300641	0.011241	44731	0.452493	Lumbar spine bone mineral density || id:ieu-a-982	Lumbar spine bone mineral density	Lumbar spine bone mineral density || ||	TRUE	igd	0.0095	62892	9.29095e-10	300641	16	ebi-a-GCST006867	Type 2 diabetes || id:ebi-a-GCST006867	TRUE	reported	igd	1	TRUE
